1 **PTGER2- $\beta$ -Catenin Axis Links High Salt Environments to Autoimmunity by Balancing**  
2 **IFN $\gamma$  and IL-10 in FoxP3<sup>+</sup> Regulatory T cells**

3

4 Tomokazu Sumida<sup>1,3</sup>, Matthew R. Lincoln<sup>1</sup>, Chinonso M. Ukeje<sup>1</sup>, Donald M. Rodriguez<sup>1</sup>,  
5 Hiroshi Akazawa<sup>3</sup>, Tetsuo Noda<sup>4</sup>, Atsuhiko T. Naito<sup>2</sup>, Issei Komuro<sup>3</sup>, Margarita  
6 Dominguez-Villar<sup>1</sup>, David A. Hafler<sup>1</sup>

7

8 <sup>1</sup>Departments of Neurology and Immunobiology, Yale School of Medicine, New Haven, CT,  
9 USA

10 <sup>2</sup>Department of Pharmacology, Faculty of Medicine, Toho University School of Medicine,  
11 Tokyo, Japan

12 <sup>3</sup>Department of Cardiovascular Medicine, The University of Tokyo Graduate School of  
13 Medicine, Tokyo, Japan

14 <sup>4</sup>Department of Cell Biology, The Cancer Institute, Japanese Foundation for Cancer  
15 Research, Tokyo, Japan

16 Correspondence should be addressed to T.S. (tomokazu.sumida@yale.edu)

17

18

1 **Abstract**

2 Foxp3<sup>+</sup> regulatory T cells (Tregs) are the central component of peripheral immune tolerance.  
3 While dysregulation of the Treg cytokine signature has been observed in autoimmune  
4 diseases such as multiple sclerosis (MS) and type 1 diabetes, the regulatory mechanisms  
5 balancing pro- and anti-inflammatory cytokine production are not known. Here, we identify  
6 imbalance between IFN $\gamma$  and IL-10 as a shared Treg signature, present in patients with MS  
7 and under high salt conditions. By performing RNA-seq analysis on human Treg  
8 subpopulations, we identify  $\beta$ -catenin as a key regulator that controls the expression of IFN $\gamma$   
9 and IL-10. The activated  $\beta$ -catenin signature is enriched specifically in IFN $\gamma$ <sup>+</sup>Tregs in  
10 humans, and this was confirmed *in vivo* with Treg-specific  $\beta$ -catenin-stabilized mice  
11 exhibiting lethal autoimmunity with a dysfunctional, IFN $\gamma$ -producing, Treg phenotype.  
12 Moreover, we identify PTGER2 as a major factor balancing IFN $\gamma$  and IL-10 production in the  
13 context of a high salt environment, with skewed activation of the  $\beta$ -catenin/SGK1/Foxo axis  
14 in IFN $\gamma$ <sup>+</sup>Tregs. These findings identify a novel molecular mechanism underlying  
15 inflammatory Tregs in human autoimmune disease and reveal a new role for a  
16 PTGER2- $\beta$ -catenin loop in Tregs linking environmental high salt conditions to autoimmunity.  
17

## 1 Introduction

2 The homeostatic maintenance of T cells is finely tuned by Foxp3<sup>+</sup> regulatory T cells  
3 (Tregs). Tregs play a distinct role from the other CD4<sup>+</sup> T cells in dampening prolonged  
4 inflammation and preventing aberrant autoimmunity<sup>1</sup>. Foxp3 has been shown to be a unique  
5 master regulator of Treg function and differentiation, and loss of function of Foxp3 is known  
6 to cause severe autoimmune and inflammatory diseases, such as immunodysregulation  
7 polyendocrinopathy enteropathy X-linked (IPEX) syndrome in humans and the *scurfy*  
8 phenotype in mice<sup>2, 3</sup>. Although Tregs are potent suppressors of immune function, the  
9 number of Tregs is often normal in a variety of autoimmune diseases, including multiple  
10 sclerosis (MS), inflammatory bowel disease (IBD), and type 1 diabetes (T1D)<sup>4, 5</sup>. These  
11 observations suggest that not only a quantitative, but also a functional dysregulation of  
12 Tregs contributes to the development of autoimmunity.

13 Tregs display their suppressive capacity in peripheral immune responses through both  
14 contact-dependent and cytokine-mediated mechanisms<sup>6</sup>. It has been shown that Tregs  
15 demonstrate substantial heterogeneity and that the balance between pro- and  
16 anti-inflammatory populations is finely regulated to maintain immunologic homeostasis<sup>7</sup>.  
17 Recent studies provided evidence that IFN $\gamma$  identifies dysfunctional Tregs in patients with  
18 autoimmunity (MS<sup>8</sup> and T1D<sup>9</sup>) and cancer (glioblastoma<sup>10</sup>). Additionally, Tregs producing the  
19 anti-inflammatory cytokine IL-10 have been reported to play prominent roles in suppressing  
20 the immune response at environmental interfaces<sup>11</sup> and development of mature memory  
21 CD8<sup>+</sup> T cells to prevent autoimmunity and chronic infection in mice<sup>12</sup>. These studies suggest  
22 that the balance between IFN $\gamma$  and IL-10 production in Tregs may be central in the  
23 maintenance of immune homeostasis; however, the molecular mechanisms underlying this  
24 regulatory balance are not known.

25 Human autoimmune disease results from an interplay between genetic factors and  
26 environmental triggers. In this regard, MS is an autoimmune disease that results from the  
27 complex interaction of predominantly common genetic variants and environmental factors<sup>13</sup>,  
28 with 233 common risk haplotypes identified to date<sup>14,15</sup>. Several environmental factors are  
29 associated with an increased risk of MS including vitamin D insufficiency, smoking, obesity,  
30 and a high salt diet<sup>16</sup>. Increased dietary salt intake has recently been associated with  
31 increased clinical disease activity in MS patients. Previously, we have observed that a high

1 salt diet (HSD) exacerbated neuroinflammation in the experimental autoimmune  
2 encephalomyelitis (EAE) model of MS<sup>17, 18</sup>, and that higher salt concentration within the  
3 physiological range skewed naïve CD4<sup>+</sup> T cells into pro-inflammatory Th17 cells<sup>17, 18</sup> and  
4 impaired Treg suppressive function through induction of IFN $\gamma$  expression<sup>19</sup>. Studies using  
5 murine models of autoimmune disease are accumulating to support this theory<sup>20, 21</sup> and  
6 recent magnetic resonance imaging (MRI) studies investigating the association between  
7 interstitial sodium content and inflammatory diseases in humans revealed higher sodium  
8 accumulation in acute MS lesions compared to chronic lesions, suggesting higher sodium  
9 concentration within the pathogenic microenvironment in MS brain<sup>22</sup>. However, it remains  
10 unknown whether a high salt diet has a direct impact on MS clinical activity<sup>23</sup>.

11  $\beta$ -catenin is an essential component of the canonical Wnt signaling pathway and is  
12 known to be involved in a variety of biological processes including carcinogenesis, stem cell  
13 maintenance, organogenesis, and aging<sup>24, 25</sup>. In the absence of Wnt ligands,  $\beta$ -catenin is  
14 actively phosphorylated by a destruction complex composed of glycogen synthase kinase  
15 3 $\beta$  (GSK3 $\beta$ ), axis inhibition protein (Axin), and casein kinase 1 (CK1), and the complex is  
16 subsequently degraded by the ubiquitin-proteasome system. Binding of Wnt ligands to their  
17 receptors inactivates the destruction complex, leading to the accumulation of  
18 unphosphorylated  $\beta$ -catenin protein, which can interact with TCF/LEF transcription factors<sup>26</sup>.  
19 While  $\beta$ -catenin and canonical Wnt signaling have been studied in the context of memory  
20 CD8<sup>+</sup> T cell development, T helper cell differentiation, and Treg function<sup>27, 28, 29, 30</sup>, results  
21 differ from study to study, depending on the experimental model utilized. In Tregs, it was first  
22 demonstrated that forced induction of constitutively active  $\beta$ -catenin in human Tregs leads to  
23 induction of survival gene expression and promotion of anti-inflammatory function<sup>28</sup>. In  
24 contrast, recent work suggested that pharmacological activation of Wnt signaling modulates  
25 regulatory activity of Foxp3 and disrupts Treg function<sup>29</sup>. This result was partially supported  
26 by another study using transgenic mice in which  $\beta$ -catenin was stabilized specifically in  
27 CD4<sup>+</sup> T cells<sup>30, 31</sup>. Although these two recent studies suggested  $\beta$ -catenin as a driving factor  
28 of Treg dysfunction, the specific mechanisms by which  $\beta$ -catenin affects Treg function and  
29 their role in modulating cytokine production by Tregs, in particular in the context of human  
30 autoimmune disease, is poorly understood.

31 Here, we show that the imbalance between IFN $\gamma$  and IL-10 is a shared Treg signature

1 observed in the patients with multiple sclerosis and high salt environment. By performing  
2 unbiased RNA-seq analysis on human Treg subpopulations, we dissect Treg heterogeneity  
3 and identify  $\beta$ -catenin as central in maintaining Treg function and regulating both IFN $\gamma$  and  
4 IL-10 cytokine production. Moreover, we clarify a previously unknown role for  $\beta$ -catenin in  
5 mediating the high salt-induced pro-inflammatory signature by creating a feed forward loop  
6 with PTGER2, which is uniquely upregulated under high salt conditions. Finally, we  
7 demonstrate the clear association between IFN $\gamma$ ,  $\beta$ -catenin, and PTGER2 expression in  
8 Tregs from MS patients. Our findings suggest that the  $\beta$ -catenin-PTGER2 axis serves as a  
9 bridge between environmental factors and autoimmune disease by modulating Treg function  
10 and this axis may be involved in the pathogenesis of autoimmune disease.

11

## 1 Results

### 2 Treg cytokine imbalance in multiple sclerosis and high salt environment

3 We and others have previously identified a pro-inflammatory Treg population  
4 characterized by the secretion of IFN $\gamma$ . This population is dysfunctional both *in vitro* and *in*  
5 *vivo*, and a high frequency of this population is associated with autoimmune disease and  
6 cancer<sup>8, 9, 10</sup>. However, the balance between pro- and anti-inflammatory Treg populations  
7 has not been defined. To address this question, we evaluated the production of  
8 pro-inflammatory (IFN $\gamma$ ) and anti-inflammatory (IL-10) cytokines by circulating human Tregs  
9 from healthy subjects and patients with MS by flow cytometry. Based on our observation that  
10 CD25<sup>hi</sup>CD127<sup>low-neg</sup>CD45RO<sup>+</sup> Tregs (memory Tregs; mTregs) are the major source for  
11 effector cytokine expression in human Tregs (Supplementary Fig. 1), we focused on mTregs,  
12 so as to avoid the potential bias caused by the variable ratio of naïve Tregs and memory  
13 Tregs between subjects. We found that mTregs isolated from MS patients (MS-Tregs)  
14 produced more IFN $\gamma$  and less IL-10 compared to healthy donors, and the ratio of IFN $\gamma$  to  
15 IL-10 producing Tregs further highlights this imbalance (Fig. 1a, b). Furthermore, we  
16 examined the mRNA expression of *IFNG* and *IL10* genes in mTregs without  
17 PMA/iomomycin stimulation, better reflecting the situation *in vivo*, and identified a trend  
18 similar to that seen in protein expression (Fig. 1c).

19 We recently demonstrated that Tregs exposed to high salt concentrations exhibited a  
20 dysfunctional phenotype with a pro-inflammatory cytokine signature skewed towards IFN $\gamma$ <sup>19</sup>.  
21 We sought to determine whether high salt could also impair the IFN $\gamma$ /IL-10 balance and  
22 found that the high salt environment caused an increase in IFN $\gamma$  and decrease in IL-10  
23 production in human mTregs after 96 h in culture (Fig. 1d, e). Gene expression kinetics of  
24 *IFNG* and *IL10* by using qPCR identified early (8 h) and late (96 h) waves of gene expression.  
25 High salt stimulation suppressed the early wave of *IFNG* and *IL10*, and enhanced the late  
26 wave of *IFNG* but not *IL10* (Fig. 1f). These findings suggest that the imbalance of IFN $\gamma$ /IL-10  
27 induced by continuous exposure to high salt conditions, which is not observed at the phase  
28 of acute response to high salt stress, might capture the dysfunctional Treg properties in the  
29 setting of autoimmunity.

### 30 $\beta$ -catenin as a regulatory factor for IFN $\gamma$ /IL-10 production in human Tregs

31 While our previous investigations have identified the AKT pathway as important in

1 inducing IFN $\gamma$  secretion with loss of Treg function<sup>32</sup>, the molecular mechanisms  
2 underpinning the balance between IFN $\gamma$  and IL-10 in Tregs are largely unknown. To address  
3 this question, we performed RNA-sequencing (RNA-seq)-based genome-wide  
4 transcriptome analysis on human Treg subsets defined by IFN $\gamma$  and IL-10 production.  
5 mTregs isolated from peripheral mononuclear cells of healthy subjects were stimulated with  
6 PMA/iomomycin for 4 h *ex vivo*. After applying cytokine capture kits for IFN $\gamma$  and IL-10, we  
7 sorted four different subpopulations (IFN $\gamma$  single positive (IFN $\gamma$ SP), IL-10 single positive  
8 (IL10SP), IFN $\gamma$  and IL-10 double positive (DP), and double negative (DN)), and we  
9 performed RNA-seq on each subpopulation (Fig 2a). We identified 672 differentially  
10 expressed genes between IFN $\gamma$ SP and IL10SP and the four populations could be  
11 distinguished by their gene expression profiles (Fig. 2b). Of note, the IFN $\gamma$ -producing  
12 populations were highly distinct from IFN $\gamma$ -negative populations, suggesting that  
13 IFN $\gamma$ -secreting Tregs represent a more dominant signature than IL-10-secreting Tregs. We  
14 also identified ten clusters of co-expressed genes (C1-C10) across the populations. IFN $\gamma$   
15 and IL-10-associated genes are enriched in C9/C10 (e.g. *CXCR3*, *CD226*, and *NKG7*) and  
16 C1/C2 (e.g. *MAF*, *SOCS3*, and *NOTCH2*), respectively.

17 To predict the key transcriptional regulators that account for IFN $\gamma$  and IL-10 production  
18 in Tregs, we performed an upstream regulator analysis in Ingenuity Pathway Analysis (IPA),  
19 using differentially expressed genes from each population (Fig. 2c). We identified  $\beta$ -catenin  
20 (*CTNNB1*) as one of the top upstream regulators in the Treg populations producing IFN $\gamma$   
21 and/or IL-10 compared to DN. Intriguingly,  $\beta$ -catenin was ranked as the top-ranked upstream  
22 regulator in the comparison between IFN $\gamma$ SP and IL10SP. Together, these results suggest  
23 that  $\beta$ -catenin plays a critical role in driving the production of both IFN $\gamma$  and IL-10 in Tregs,  
24 especially for IFN $\gamma$ . We also identified several upstream regulators that have been  
25 demonstrated to have critical roles in maintaining Treg function, including *MYB*<sup>33</sup>, *SATB1*<sup>34</sup>,  
26 *NFATC2*<sup>35</sup>, and *KLF2*<sup>36</sup>, suggesting that our upstream regulator analysis provides a reliable  
27 readout.

28 In agreement with these findings, gene-set-enrichment analysis (GSEA) applied to  
29 transcriptional profiles in each population identified significant enrichment of the  
30 Wnt/ $\beta$ -catenin signaling pathway in IFN $\gamma$ -producing Treg subsets (Fig. 2d, Supplementary  
31 Fig. 2a). Notably, IFN $\gamma$ SP exhibited the highest enrichment score for the Wnt/ $\beta$ -catenin

1 signaling pathway. Further GSEA analysis with different gene sets also provided similar  
2 results (Supplementary Fig. 2b). Taken together, these findings suggest that Wnt/ $\beta$ -catenin  
3 signaling is more activated in IFN $\gamma$ -secreting Tregs than in other subpopulations of  
4 circulating human Tregs.

### 5 **$\beta$ -catenin is stabilized in the IFN $\gamma$ secreting Treg population**

6 As  $\beta$ -catenin has multiple cellular functions and interacts with a variety of regulatory  
7 molecules, there is a growing body of evidence indicating its potential role in multiple  
8 pathological conditions, including MS<sup>37,38</sup>. We first confirmed that  $\beta$ -catenin is stabilized and  
9 transcriptionally active in IFN $\gamma$ SP compared to DN in *ex vivo* Tregs by examining the level of  
10 active  $\beta$ -catenin (ABC), the dephosphorylated form of  $\beta$ -catenin with established active  
11 transcriptional activity<sup>39</sup> (Fig. 3a). Notably, the DP and IL10SP also exhibited increased  
12 active  $\beta$ -catenin expression compared to DN *ex vivo*, suggesting that  $\beta$ -catenin signaling is  
13 important not only for IFN $\gamma$  but also for IL-10 production in Tregs, consistent with our  
14 upstream regulator and enrichment analyses (Fig. 2c, Supplementary Fig. 2a). To exclude  
15 the possibility that PMA/iomomycin stimulation affected  $\beta$ -catenin stability, we also  
16 measured active  $\beta$ -catenin levels in CXCR3<sup>+</sup> Th1-like Tregs, which contain most of the  
17 IFN $\gamma$ -producing Tregs<sup>40</sup> without PMA/iomomycin stimulation; these analyses confirmed that  
18 active  $\beta$ -catenin expression was significantly increased in the CXCR3<sup>+</sup>Th1-like Treg  
19 population (Fig. 3b). In agreement with these data, the downstream  $\beta$ -catenin target genes,  
20 *AXIN2* and *TCF7*, and the protein TCF-1 (encoded by *TCF7*) were upregulated in IFN $\gamma$ SP  
21 compared to DN *ex vivo* (Fig. 3c, Supplementary Fig. 3c). This was consistent with our  
22 previously published microarray data for IFN $\gamma$ -positive and IFN $\gamma$ -negative Tregs<sup>32</sup>  
23 (Supplementary Fig. 3a).

24 To examine whether the *in vitro* model can recapitulate the *ex vivo* results, we examined  
25 active  $\beta$ -catenin levels on each of the Treg subsets after four days of culture with  
26 anti-CD3/CD28 stimulation. IFN $\gamma$ -producing Treg populations (IFN $\gamma$ SP and DP) showed  
27 higher active  $\beta$ -catenin expression compared to IL10SP and DN (Fig. 3d), indicating that  
28 stabilization of  $\beta$ -catenin is more enhanced in IFN $\gamma$ SP compared to IL10SP under TCR  
29 stimulation. IL-12 is an essential cytokine for Th1 differentiation and is known to induce  
30 IFN $\gamma$ -producing pathogenic Tregs under TCR stimulation<sup>8</sup>. We found that upregulation of  
31  $\beta$ -catenin was also observed in IL-12-induced Th1-like Tregs, especially in the



1 IFN $\gamma$ -producing population (Fig. 3e). To determine if Wnt/ $\beta$ -catenin signaling was necessary  
2 for IFN $\gamma$  production in Th1-like Tregs, we blocked  $\beta$ -catenin signaling with the  $\beta$ -catenin  
3 signaling inhibitor, PKF115-584 (PKF). Tregs treated with PKF exhibited a significantly  
4 reduced production of IFN $\gamma$  (Fig. 3f, g). IL-10 production was also suppressed by PKF  
5 treatment, albeit less dramatically than IFN $\gamma$ . To further confirm these results, we knocked  
6 down the *CTNNB1* gene in Tregs using short hairpin RNA (shRNA) (Supplementary Fig. 3b)  
7 and demonstrated that IL-12-induced IFN $\gamma$  and IL-10 production was suppressed by  
8 silencing of  $\beta$ -catenin (Fig. 3h, i). These data suggest that  $\beta$ -catenin plays a critical role in  
9 IFN $\gamma$  and IL-10 induction in human Tregs, but more profoundly in IFN $\gamma$  production under TCR  
10 stimulation.

### 11 **Constitutive activation of $\beta$ -catenin in Tregs induces *Scurfy*-like autoimmunity**

12 Although the role of Wnt/ $\beta$ -catenin signaling on Tregs has been assessed in different  
13 mouse models, the results vary from study to study. To ascertain the physiological relevance  
14 of  $\beta$ -catenin signaling in Tregs, we generated Treg-specific  $\beta$ -catenin stabilized mice  
15 (*Foxp3<sup>Cre</sup>/ $\beta$ -ctn <sup>$\Delta$ Ex3</sup>*) by crossing *Foxp3*-IRES-Cre mice<sup>41</sup> with  *$\beta$ -ctn <sup>$\Delta$ Ex3</sup>* mice<sup>42</sup>  
16 (Supplementary Fig. 4a), where the unphosphorylated active form of  $\beta$ -catenin was  
17 specifically induced in Tregs. In these *Foxp3<sup>Cre</sup>/ $\beta$ -ctn <sup>$\Delta$ Ex3</sup>* mice,  $\beta$ -catenin was highly  
18 stabilized in *Foxp3<sup>+</sup>* Tregs, but not on *Foxp3<sup>-</sup>* non-Tregs (Fig. 4a, Supplementary Fig. 4b, c).  
19 This mouse model allowed us to assess the role of  $\beta$ -catenin signaling in *Foxp3<sup>+</sup>* Tregs more  
20 precisely than using Tregs isolated from pan-CD4<sup>+</sup> T cell specific  $\beta$ -catenin-stabilized mice  
21 (*CD4-Cre/ $\beta$ -ctn <sup>$\Delta$ Ex3</sup>*) mice<sup>30</sup>. Because stabilization of  $\beta$ -catenin in conventional T cells  
22 resulted in a highly pro-inflammatory phenotype, there may be a substantial effect from  
23 conventional T cells to Tregs in *CD4-Cre/Ctnnb1 <sup>$\Delta$ Ex3</sup>* mice. *Foxp3<sup>Cre</sup>/ $\beta$ -ctn <sup>$\Delta$ Ex3</sup>* mice  
24 spontaneously developed a hunched posture, crusting of the ears, eyelids and tail and  
25 showed thymic atrophy, splenomegaly and lymphadenopathy (Fig. 4b). Histologic analysis  
26 demonstrated lymphocyte infiltration into several tissues, such as lung, pancreas, liver, and  
27 intestine, representing systemic inflammation in *Foxp3<sup>Cre</sup>/ $\beta$ -ctn <sup>$\Delta$ Ex3</sup>* mice (Fig. 4c). This  
28 *scurfy*-like fulminant autoimmunity led to premature death of *Foxp3<sup>Cre</sup>/ $\beta$ -ctn <sup>$\Delta$ Ex3</sup>* mice within  
29 40 days of birth with 100% penetrance (Fig. 4d).

30 The balance between Tregs and effector T cells is critical to maintain T cell homeostasis  
31 both in central and peripheral lymphoid tissue. The percentage of Tregs within thymic CD4<sup>+</sup>

1 T cells of *Foxp3<sup>Cre</sup>/β-ctn<sup>ΔEx3</sup>* mice remained at the same level as WT mice by the age of 3  
2 weeks and even increased at the age of 5 weeks; however, the number of Tregs in thymus  
3 began to decline at the age of 3 weeks in *Foxp3<sup>Cre</sup>/β-ctn<sup>ΔEx3</sup>* mice (Supplementary Fig. 4d).  
4 Notably, splenic Tregs showed a significant decrease at an early stage. In contrast,  
5 *Foxp3<sup>Cre</sup>/β-ctn<sup>ΔEx3</sup>* mice displayed an increased number of CD4<sup>+</sup> and CD8<sup>+</sup> conventional T  
6 cells in secondary lymphoid organs (spleen and lymph nodes) and higher expression of  
7 effector cytokines such as *IFNG*, *IL4*, and *IL10*, but not *IL17A* (Supplementary Fig. 4e).  
8 Downregulation of *RORC* in both Tregs and conventional CD4<sup>+</sup> T cells is the opposite for  
9 *CD4-Cre/β-ctn<sup>ΔEx3</sup>* mice<sup>30</sup>, highlighting the difference between *CD4-Cre/β-ctn<sup>ΔEx3</sup>* mice and  
10 *Foxp3<sup>Cre</sup>/β-ctn<sup>ΔEx3</sup>* mice. To characterize the functional properties of *Foxp3<sup>Cre</sup>/β-ctn<sup>ΔEx3</sup>* Tregs,  
11 we examined Helios expression<sup>43</sup>, and found that *Foxp3<sup>Cre</sup>/β-ctn<sup>ΔEx3</sup>* Tregs lost Helios  
12 expression compared to *Foxp3<sup>Cre</sup>* Tregs, supporting the unstable and dysfunctional feature  
13 of *Foxp3<sup>Cre</sup>/β-ctn<sup>ΔEx3</sup>* Tregs (Supplementary Fig. 4f). These results suggest that forced  
14 expression of a stabilized form of β-catenin in Tregs influences their functional stability in the  
15 periphery more than in the central compartment.

16 To examine the suppressive capacity of *Foxp3<sup>Cre</sup>/β-ctn<sup>ΔEx3</sup>* Tregs, we performed an *in*  
17 *vitro* suppression assay. As expected, *Foxp3<sup>Cre</sup>/β-ctn<sup>ΔEx3</sup>* Tregs showed less suppressive  
18 activity compared to *Foxp3<sup>Cre</sup>* Tregs (Fig. 4e). Given that the direct interaction of β-catenin  
19 with Foxo1 has been reported<sup>44,45</sup>, we noted that the morphological and pathophysiological  
20 phenotype of *Foxp3<sup>Cre</sup>/β-ctn<sup>ΔEx3</sup>* mice was similar to that of Treg-specific Foxo1 depletion  
21 mice, which exhibited fulminant autoimmunity and disrupted Treg function with aberrant  
22 IFNγ expression<sup>46</sup>. To identify transcriptional changes in β-catenin stabilized Tregs, we  
23 measured the gene expression signature of Tregs isolated from *Foxp3<sup>Cre</sup>/β-ctn<sup>ΔEx3</sup>* mice by  
24 genome-wide DNA microarrays (Fig. 4f). Further assessment with GSEA revealed similar  
25 transcriptional profiles between *Foxp3<sup>Cre</sup>/β-ctn<sup>ΔEx3</sup>* Tregs and Foxo1-depleted Tregs  
26 (Supplementary Fig. 4h). In agreement with this observation, phosphorylated Foxo1 and  
27 Foxo3a were increased in *Foxp3<sup>Cre</sup>/β-ctn<sup>ΔEx3</sup>* Tregs compared to *Foxp3<sup>Cre</sup>* Tregs (Fig. 4g). To  
28 determine whether β-catenin and Foxo1 are directly interacting with each other, we  
29 performed an *in situ* proximity ligation assay (PLA) on human Tregs and detected the PLA  
30 signal in human Tregs (Fig. 4h). Taken together, our results indicate that β-catenin regulates  
31 the pro-inflammatory Th1-skewing program in Tregs in concert with the Foxo pathway.

## 1 High salt environment activates the $\beta$ -catenin/SGK1/Foxo axis and produces 2 IFN $\gamma$ /IL-10 imbalance

3 It has been shown previously that the higher sodium concentration detected in tissue  
4 interstitium under physiological conditions boosted the induction of Th17 cells and  
5 diminished the suppressive capacity of Tregs through activation of SGK1<sup>17, 19</sup>. We recently  
6 demonstrated that the PI3K/AKT1/Foxo axis also played a pivotal role in inducing  
7 IFN $\gamma$ -producing dysfunctional Tregs<sup>32</sup>. Furthermore, we observed that p-Foxo1/3a and  
8 SGK1 were upregulated in *Foxp3<sup>Cre</sup>/ $\beta$ -ctn <sup>$\Delta$ Ex3</sup>* Tregs (Fig. 4g). To assess if the SGK1/Foxo  
9 axis is activated in human Treg subpopulations, we examined phosphorylated SGK1  
10 (p-SGK1) and phosphorylated Foxo1 (p-Foxo1) levels by flow cytometry and found that both  
11 were highly expressed in the IFN $\gamma$ -producing Treg population *ex vivo* (Supplementary Fig.  
12 5a). Additionally, we demonstrated the direct interaction between  $\beta$ -catenin and Foxo1 in  
13 IFN $\gamma$ -producing human Tregs by using PLA (Supplementary Fig. 5b). These findings  
14 prompted us to hypothesize that activation of  $\beta$ -catenin is involved in high salt-induced IFN $\gamma$   
15 production as an upstream regulator of the SGK1/Foxo axis. Higher expression of active  
16  $\beta$ -catenin, p-SGK1, and p-Foxo1 was observed specifically in the IFN $\gamma$ -producing human  
17 Treg subset under high salt conditions (Fig. 5a), but not in the IL-10-producing subset  
18 (Supplementary Fig. 5c). We also confirmed that  $\beta$ -catenin target genes (*AXIN2* and *TCF7*)  
19 and TCF-1 protein were upregulated in human Tregs treated with increased salt  
20 concentration (Fig. 5b, Supplemental Fig. 5d). Interestingly, additional salt treatment skewed  
21 the IL-12 induced, Th1-like Treg to produce more IFN $\gamma$  and less IL-10, suggesting that the  
22 high salt environment might exacerbate the IFN $\gamma$ -skewing pathogenic Treg signature that  
23 resembles the MS-Treg phenotype (Fig. 5c, Supplemental Fig. 5e). To determine if  $\beta$ -catenin  
24 activation was necessary for IFN $\gamma$  induction under high salt conditions, we  
25 pharmacologically blocked  $\beta$ -catenin signaling with two different Wnt/ $\beta$ -catenin signaling  
26 inhibitors, PKF and IWR-1. PKF or IWR-1 significantly downregulated high salt-induced IFN $\gamma$   
27 expression in human Tregs (Fig. 5d, Supplementary Fig. 5f). These results were also  
28 observed upon genetic knock down of *CTNNB1* by shRNA (Fig. 5e, f). Given that SGK1 is a  
29 target of  $\beta$ -catenin signaling<sup>47</sup>, we then tested the impact of inhibiting  $\beta$ -catenin signaling on  
30 SGK1 activation. Pharmacological inhibition of  $\beta$ -catenin signaling by PKF or IWR prevented  
31 SGK1 phosphorylation under high salt stimulation in human Tregs (Supplementary Fig. 5g).

1 To clarify the role of SGK1/Foxo axis in IFN $\gamma$  and IL-10 production under high salt conditions,  
2 we measured the production of IFN $\gamma$  and IL-10 and Foxo1 phosphorylation in the presence  
3 or absence of SGK1 inhibitor (GSK650394) in human Tregs. GSK650394 treatment  
4 ameliorated high salt-induced IFN $\gamma$  production and Foxo1 phosphorylation, but had no  
5 impact on IL-10 production (Supplementary Fig. 5h, i). These results suggest that  $\beta$ -catenin  
6 positively regulates salt-induced IFN $\gamma$  expression through activation of the SGK1/Foxo axis.  
7 We also extended the analysis to human effector T cells (Teff, CD4<sup>+</sup> CD25<sup>-</sup>) and Jurkat T  
8 cells. Both of these displayed active  $\beta$ -catenin signaling under high salt condition  
9 (Supplementary Fig. 6a). In Teff cells there was also an imbalance of IFN $\gamma$  and IL-10  
10 production in agreement with our Treg data (Supplementary Fig. 6b). In addition, to further  
11 define the action of  $\beta$ -catenin/SGK1/Foxo1 axis in high salt conditions, we generated  
12  $\beta$ -catenin-depleted human Jurkat T cells by using CRISPR/Cas9 technology and examined  
13 whether SGK1 and Foxo1 phosphorylation were regulated by  $\beta$ -catenin during high salt  
14 exposure. High salt-induced SGK1 and Foxo1 phosphorylation were attenuated in  $\beta$ -catenin  
15 knockout Jurkat T cells (Supplementary Fig. 6c, d). These data, along with the evidence  
16 from non-immune cells<sup>48</sup>, supports our hypothesis that the  $\beta$ -catenin/SGK1/Foxo1 axis is  
17 activated by high salt stimulation.

18 We next explored the molecular mechanisms underlying high salt-induced  $\beta$ -catenin  
19 activation. First, we examined whether Wnt ligands play a role in this aberrant activation of  
20  $\beta$ -catenin signaling in a high salt environment. We used Frizzled-8 FC chimera protein  
21 (Fzd8-FC), which is known to act as a scavenger of Wnt ligands, to inhibit the effect of Wnt  
22 ligands on Tregs. Activation of  $\beta$ -catenin assessed by ABC level or production of IFN $\gamma$  and  
23 IL-10 were not affected by Fzd8-FC treatment in control or high salt conditions, suggesting  
24 that the role of Wnt ligands in high salt-induced activation of  $\beta$ -catenin signaling was  
25 dispensable (Supplementary Fig. 7a, b). Although a salinity stress sensor has not been fully  
26 described in mammalian cells, a number of pathways contributing to the salt stress response  
27 have been identified<sup>48, 49</sup>. Within these pathways, we focused on AKT kinase because it is  
28 well known to regulate  $\beta$ -catenin signaling via direct phosphorylation of  $\beta$ -catenin<sup>50</sup> or  
29 indirectly through GSK3 $\beta$ , which is a negative regulator of  $\beta$ -catenin<sup>51</sup>. Moreover, AKT is  
30 known to play a prominent role on Th1 differentiation, and we recently reported that AKT1  
31 acted as a potent inducer for IFN $\gamma$ -producing, Th1-like Tregs and that AKT1 inhibition could

1 recover the dysfunctional MS-Treg phenotype<sup>32</sup>. Indeed, the PI3K-AKT pathway was highly  
2 enriched in the IFN $\gamma$ -producing Treg subset and AKT phosphorylation at S473 was  
3 increased in IFN $\gamma$ -producing Tregs (Supplementary Fig. 7c, d). These results prompted us to  
4 hypothesize that activation of AKT kinase regulates  $\beta$ -catenin signaling during chronic high  
5 salt stress conditions. To examine the effect of chronic high salt stimulation independently of  
6 TCR signaling, we took advantage of the Jurkat T cell line, that can be maintained without  
7 TCR stimulation. We then investigated whether  $\beta$ -catenin could be directly activated by AKT  
8 by examining AKT-specific phosphorylation of  $\beta$ -catenin (Ser522), which stabilizes  
9  $\beta$ -catenin<sup>50</sup>. Phosphorylation of  $\beta$ -catenin (Ser522) was increased in a high salt environment  
10 and this effect was reversed by the AKT inhibitor MK2206, indicating that activation of AKT is  
11 responsible for stabilizing  $\beta$ -catenin during high salt stimulation<sup>48</sup> (Supplementary Fig. 7e).  
12 Furthermore, we demonstrate that phosphorylation of GSK3 $\beta$  at Ser9, which is an important  
13 site of phosphorylation by AKT<sup>52</sup>, was increased by high salt stimulation (Supplementary Fig.  
14 7f). We also confirmed that both p-AKT and p-GSK3 $\beta$  levels were not affected by silencing  
15  $\beta$ -catenin (Supplemental Fig. 7f), suggesting that both of them act upstream of  $\beta$ -catenin.  
16 These data indicate that AKT regulates  $\beta$ -catenin activation in both direct and indirect  
17 mechanisms under high salt conditions.

## 18 **A high salt-induced PTGER2- $\beta$ -catenin loop leads to imbalance between IFN $\gamma$ and** 19 **IL-10**

20 Both IFN $\gamma$  and IL-10 are upregulated in IL-12-induced Th1-like Tregs in a  
21  $\beta$ -catenin-dependent manner (Fig. 3f-i). However, IL-10 expression was significantly  
22 suppressed by high salt treatment, contrary to IFN $\gamma$ . In fact, the  $\beta$ -catenin/SGK1/Foxo axis  
23 was not activated in IL-10SP after high salt treatment (Supplementary Fig. 5c). Additionally,  
24 the effect of high salt on IL-10 production could not be explained by activated  $\beta$ -catenin  
25 signaling (Fig. 5e, f, Supplementary Fig. 5f). Thus, we hypothesized that there might exist a  
26 factor that can be uniquely induced in the high salt environment but not in IL-12-driven Th1  
27 conditions, resulting in IL-10 inhibition. This was addressed by comparing gene expression  
28 profiles of Tregs between control media and IL-12 supplemented media (Th1), and also  
29 between control media and NaCl supplemented media (NaCl). Among the group of  
30 differentially expressed genes in each comparison, we identified six genes that were  
31 upregulated in high salt conditions but downregulated in Th1 conditions, and four genes that

1 were regulated in the opposite direction, which are potentially able to account for the high  
2 salt-induced IFN $\gamma$ /IL10 imbalance (Fig. 6a).

3 Prostaglandin E receptor 2 (PTGER2) is in the family of G protein-coupled receptors,  
4 and acts as one of the receptors for prostaglandin E2 (PGE2). PGE2-PTGER2 signaling  
5 increases intracellular cAMP, which in turn activates PKA signaling, dampening T cell  
6 activation<sup>53</sup>. However, the signal through PTGER2 is also known to regulate the production  
7 of cytokines in a context-dependent manner<sup>54-58</sup>, and the strength of PI3K-AKT signaling has  
8 been reported as an important component affecting the action of PTGER2 on cytokine  
9 production, especially IFN $\gamma$  production in T cells<sup>59</sup>. Since we have observed a role for  
10 PTGER2 in promoting the pathogenic phenotype by modulating IFN $\gamma$ /IL10 balance in Th17  
11 cells<sup>56</sup> and high salt treatment induces a pathogenic Th17 cell signature, we hypothesized  
12 that PTGER2 regulates the IFN $\gamma$ /IL-10 balance in salt stimulated Tregs. Indeed, *PTGER2*  
13 was upregulated after high salt treatment in human Tregs and Th17 cells (Fig. 6b) and was  
14 highly expressed in IFN $\gamma$ SP compared to IL10SP (Supplementary Fig. 8a).

15 Given the evidence of a positive relationship between  $\beta$ -catenin signaling and  
16 PTGER2<sup>60, 61</sup>, we investigated whether  $\beta$ -catenin and PTGER2 build an autoregulatory loop  
17 during chronic high salt exposure. To understand the link between  $\beta$ -catenin and PTGER2 in  
18 the high salt environment, we used Jurkat T cells to demonstrate that high salt-induced  
19 PTGER2 was suppressed by genetic deletion of *CTNNB1* (Supplementary Fig. 8b). We also  
20 confirmed that PTGER2 knockdown could partially ameliorate high salt-induced  $\beta$ -catenin  
21 activation (Supplementary Fig. 8c). These results suggest the presence of a  
22  $\beta$ -catenin-PTGER2 feed-forward loop under high salt conditions. We then examined  
23 whether the PTGER2- $\beta$ -catenin loop contributes to the IFN $\gamma$ -IL-10 balance in human Tregs  
24 under high salt conditions. To this end, human Tregs were transduced with shRNA directed  
25 against PTGER2 and stimulated in the presence and absence of additional NaCl. PTGER2  
26 silencing abolished the high salt-induced imbalance of IFN $\gamma$  and IL-10 production (Fig. 6c, d).  
27 Moreover, PTGER2 knockdown eliminated the high salt-induced increase of ABC in IFN $\gamma$ SP,  
28 while it did not affect ABC level in IL10SP, suggesting that induction of IFN $\gamma$  by high salt  
29 conditions depended on the PTGER2- $\beta$ -catenin loop, but IL-10 suppression by high salt  
30 is dependent on PTGER2 *per se* but not on  $\beta$ -catenin.

31 PTGER2 is known to regulate cytokine production in a context-dependent manner<sup>58</sup>,



1 and the strength of PI3K-AKT signaling has been reported as one of the important  
2 components affecting the action of PTGER2 on cytokine production, especially in IFN $\gamma$   
3 production on conventional CD4<sup>+</sup> T cells<sup>59</sup>. Based on this evidence, we hypothesized that  
4 the high salt-induced PTGER2- $\beta$ -catenin loop could be amplified in cells where AKT is  
5 activated, such as in IFN $\gamma$  producing Tregs (IFN $\gamma$ SP), but not in the cells with lower AKT  
6 activity, such as IL-10 producing Tregs (IL10SP). We then tested the impact of modulating  
7 AKT signaling on IFN $\gamma$  and IL-10 production in Tregs under high salt conditions via  
8 increasing CD28 co-stimulation. High salt-induced IFN $\gamma$  production was boosted by  
9 strengthening AKT signaling with higher CD28 co-stimulation (Supplementary Fig. 8d)<sup>59</sup>. By  
10 contrast, high salt-induced IL-10 inhibition was not altered. Together, these data indicated  
11 that high salt induces a positive feedback loop between  $\beta$ -catenin and PTGER2 in  
12 conjunction with activated AKT status, resulting in amplification of IFN $\gamma$  production in Tregs.

### 13 **Stabilized $\beta$ -catenin is observed in Tregs from mice fed a high salt diet and MS** 14 **patients**

15 To examine if  $\beta$ -catenin is stabilized under high salt conditions *in vivo*, we fed wild type  
16 mice with either a normal salt diet (NSD), containing 0.4% of NaCl, or a high salt diet (HSD),  
17 containing 4% NaCl, and assayed  $\beta$ -catenin expression on Tregs. We found that  $\beta$ -catenin  
18 and phosphorylated Foxo1/3a/4 were increased in Tregs from high salt diet mice (Fig. 7a).  
19 Next, we determined if  $\beta$ -catenin is more stabilized in MS-Tregs as compared to Tregs from  
20 healthy subjects. The level of active  $\beta$ -catenin in IFN $\gamma$  producing Tregs was increased in MS  
21 patients compared to healthy subjects (Fig. 7b). We also found a positive correlation  
22 between IFN $\gamma$  production and the level of active  $\beta$ -catenin in MS-Tregs but not in healthy  
23 subjects (Fig. 7c). Furthermore, to investigate the link between *PTGER2* expression and  
24 active  $\beta$ -catenin level or *IFNG* expression in MS-Tregs, we assessed the expression of  
25 these factors in Tregs from healthy subjects and MS patients. Notably, higher expression of  
26 *PTGER2* and active  $\beta$ -catenin level correlated with *IFNG* expression in MS-Tregs but not in  
27 Tregs from healthy subjects (Fig. 7d, e). These findings provide *in vivo* evidence to support  
28 our hypothesis that the PTGER2- $\beta$ -catenin loop plays an important role in the salt-induced  
29 malfunction of Tregs and links this salt signature to the pathogenic profile of MS-Tregs.

## 1 Discussion

2 Loss of Foxp3<sup>+</sup> regulatory T cell function is associated with a number of autoimmune  
3 diseases including MS<sup>8</sup> and type 1 diabetes<sup>9</sup>, and clinical trials involving adoptive transfer of  
4 autologous Tregs are now in progress. We and others have shown that IFN $\gamma$  expression  
5 correlates with loss of Treg function, and that blocking IFN $\gamma$  can partially restore *in vitro*  
6 suppressor function. Moreover, a high salt environment skews Tregs into an IFN $\gamma$ -producing  
7 dysfunctional state. Here, we present data demonstrating that not only induction of IFN $\gamma$ , but  
8 also reduction of IL-10, is observed in Tregs from MS patients as a shared signature with  
9 high salt conditions. Using RNA-seq based transcriptional profiling of IFN $\gamma$  and/or IL-10  
10 producing human Tregs, we identified  $\beta$ -catenin as an upstream regulator for IFN $\gamma$  and IL-10  
11 production. Treg-specific activation of  $\beta$ -catenin resulted in *scurfy*-like lethal autoimmunity  
12 accompanied by Treg dysfunction and excessive IFN $\gamma$  expression. Furthermore,  $\beta$ -catenin is  
13 stabilized under high salt conditions and acts upstream of the SGK1/Foxo axis, accounting  
14 for the pathogenic phenotype. Our results demonstrate a novel role of  $\beta$ -catenin as a  
15 regulatory molecule for Treg functional plasticity and also provide molecular mechanisms  
16 that link an environmental factor to autoimmune disease (Supplementary Fig. 9).

17 It has become apparent that Tregs display heterogeneity and plasticity in function and  
18 cytokine profile and an IFN $\gamma$ -producing phenotype has been observed in autoimmune  
19 diseases, such as MS<sup>8</sup> and T1D<sup>9</sup>. These Th1-like Tregs are dysfunctional and are  
20 considered to be important in disease pathophysiology. In contrast, IL-10 producing Tregs  
21 appear to play a protective role in autoimmunity, given that IL-10 is an anti-inflammatory  
22 cytokine and defects in IL-10 are known to induce autoimmunity<sup>11</sup>. However, the molecular  
23 mechanisms that control IL-10 production in Tregs and the mechanisms that regulate the  
24 balance between IFN $\gamma$  and IL-10 are poorly understood. Moreover, with clinical trials of  
25 autologous Treg infusions in patients with autoimmune disease, identification of targetable  
26 pathways to alter the dysfunctional Treg state may be of clinical utility.

27 In our experiments, transcriptional profiling of human Treg subsets based on IFN $\gamma$  and  
28 IL-10 production provided new insights into Treg heterogeneity. We identify  $\beta$ -catenin as a  
29 key regulator identified by upstream regulator analysis and demonstrate its role in skewing  
30 Tregs into an IFN $\gamma$ -producing dysfunctional state in human Tregs and in murine models. Of  
31 note, we also identified additional upstream regulators, either previously reported or of



1 interest for future studies: *MYB*, *SATB1*, *NFATC2*, *KLF2*, *ZBTB16*, and *DDIT3* were all found  
2 to be significant upstream regulators across the Treg subpopulations. Treg-specific roles for  
3 *MYB*<sup>33</sup>, *SATB1*<sup>34</sup>, *NFATC2*<sup>35</sup>, and *KLF2*<sup>36</sup> have already been demonstrated in maintaining  
4 Treg functional properties, supporting the validity of our upstream regulator analysis. Given  
5 that these factors have a capacity to interact with  $\beta$ -catenin, for example,  $\beta$ -catenin can form  
6 a complex with SATB1 and modulate Th2 cell differentiation<sup>62</sup>, it is likely that these factors  
7 can interact to establish a complex regulatory system in Treg homeostasis.

8 Although several studies have demonstrated the role of  $\beta$ -catenin in Tregs, it is still  
9 unknown how  $\beta$ -catenin contributes to Treg function and the effector cytokine signature. One  
10 study demonstrated  $\beta$ -catenin as an anti-inflammatory factor in the context of generating  
11 long-lived suppressive Tregs via anti-apoptotic gene induction<sup>28</sup>, and two previous studies  
12 showed that activation of  $\beta$ -catenin provokes Treg dysfunction, leading to exaggerated  
13 colitis in a murine model<sup>29,30</sup>. We show that Treg-specific stabilization of  $\beta$ -catenin resulted in  
14 loss of suppressive properties of Tregs and induced a lethal *scurfy*-like phenotype in mice.  
15 Tregs isolated from *Foxp3*<sup>Cre</sup>/ *$\beta$ -ctn* <sup>$\Delta$ Ex3</sup> mice had significant upregulation of effector cytokines,  
16 such as IFN $\gamma$ , IL-4, IL-10, but not IL-17A. This result is consistent with a model, supported by  
17 our transcriptional analysis on human Treg subsets, where  $\beta$ -catenin plays a role in IL-10 as  
18 well as IFN $\gamma$  production. While a Th17-like signature was previously reported as a result of  
19 activation of  $\beta$ -catenin in Tregs, the examination of cytokine signature and functional  
20 experiments were all performed on Tregs isolated from *CD4-Cre/Cttnb1* <sup>$\Delta$ Ex3</sup> mice<sup>30</sup>. Given  
21 that conventional CD4<sup>+</sup> T cells in *CD4-Cre/Cttnb1* <sup>$\Delta$ Ex3</sup> mice displayed a robust  
22 pro-inflammatory phenotype, the properties of Tregs in those mice can be affected by their  
23 altered cytokine microenvironment, and it is not surprising that our results with Treg-specific  
24 genetic intervention using *Foxp3-Cre* mice provide different results as compared to  
25 *CD4-Cre*-based intervention. Our *Foxp3-Cre*-based Treg specific intervention provides  
26 direct evidence for the role of  $\beta$ -catenin in Tregs.

27 The incidence of autoimmune diseases has been increasing in the last half century,  
28 which cannot be explained by genetic adaptation. Thus, there is great interest in studying  
29 the interplay between genetic risks and environmental triggers<sup>63</sup>. Among several  
30 environmental triggers, a high salt diet may be one factor contributing to the increasing  
31 incidence of autoimmune diseases, though this as yet requires further epidemiologic

1 investigations<sup>64</sup>. There is growing evidence that the excess uptake of salt can modulate both  
2 the innate and adaptive immune system<sup>65</sup>. We previously observed that higher salt  
3 concentration has direct effects on the induction of Th17 cells and the stability of Tregs,  
4 manifest by aberrant IFN $\gamma$  production<sup>19</sup>. Of note, we also found that high salt-exposed Tregs  
5 lose IL-10 expression. This IFN $\gamma$ /IL-10 imbalance was observed in MS-Tregs, suggesting  
6 that the salt-induced Treg signature may overlap with the MS pathogenic profile. The  
7 importance of IFN $\gamma$ /IL-10 balance in the context of salt-induced immune alteration was  
8 supported by a previous study showing that increased sodium content in colon tissue of  
9 HSD mice resulted in excessive inflammation in IBD models<sup>21</sup>. Interestingly,  $\beta$ -catenin  
10 signaling was activated not only in Tregs but also in Th17 cells under stimulation with high  
11 salt (data not shown). Furthermore, here we demonstrate that PTGER2 accounts for high  
12 salt-induced IFN $\gamma$ /IL-10 imbalance in Tregs by creating a positive feed forward loop with  
13  $\beta$ -catenin. Notably, previous studies have clarified the interaction between PGE2, a ligand  
14 for PTGER2, and Wnt/ $\beta$ -catenin signaling in colorectal carcinogenesis<sup>60, 61, 66</sup>. It has also  
15 been reported that Tregs can produce PGE2<sup>67</sup> and that PGE2 is enriched in EAE lesions<sup>68</sup>.  
16 Therefore, PGE2-PTGER2 signaling could be amplified in Tregs under high salt conditions  
17 and also in the MS lesion. However, the role of PGE2 in EAE and MS remains unclear and  
18 further investigation is needed. Given that emerging studies have highlighted the role of  
19 PGE2 signaling and Wnt/ $\beta$ -catenin signaling in mucosal tolerance, our finding of a high  
20 salt-induced PTGER2/ $\beta$ -catenin axis may provide new insights into the regulation of gut  
21 immune homeostasis. Since  $\beta$ -catenin activation is reported to induce tolerogenic dendritic  
22 cells and PTGER2 has a context-dependent role on innate cells, future studies with more  
23 detailed characterization of PTGER2- $\beta$ -catenin signaling dynamics in mucosal immune  
24 homeostasis are warranted.

25 In summary, we provide genome-wide transcriptomic profiles of human *ex vivo* Treg  
26 subpopulations, which unveil the heterogeneity of Tregs in terms of IFN $\gamma$  and IL-10  
27 production. Further analysis and biological validation identify  $\beta$ -catenin as a key molecule in  
28 maintaining Treg function and production of IFN $\gamma$ /IL-10 cytokines in both human and murine  
29 Tregs. Moreover, we uncover the unexpected role of PTGER2 in driving the imbalance of  
30 IFN $\gamma$ /IL-10 concomitant with activation of  $\beta$ -catenin signaling under high salt conditions.  
31 Lastly, we show that Tregs from MS patients display positive correlations among

1 IFN $\gamma$  production, *PTGER2* expression, and active  $\beta$ -catenin level, which are not observed in  
2 Tregs from healthy subjects (Fig. 7c-e). Thus, our study in humans with autoimmune  
3 disease and confirmed in mouse models indicates that the *PTGER2*- $\beta$ -catenin axis serves  
4 as a bridge between environmental factors and autoimmune disease by modulating Treg  
5 properties.

## 1 **Methods**

### 2 **Study subjects**

3 Peripheral blood was drawn from healthy individuals and patients with MS after informed  
4 consent and approval by the Institutional Review Board at Yale University. The patients were  
5 diagnosed with either Clinically Isolated Syndrome (CIS) or Relapsing-Remitting MS  
6 (RRMS) by 2010 MacDonald Criteria and were not treated with any immunomodulatory  
7 therapy at the time of the blood draw. All experiments conformed to the principles set out in  
8 the WMA Declaration of Helsinki and the Department of Health and Human Services  
9 Belmont Report. Clinical characteristics of evaluated MS patients are listed in  
10 Supplementary Table 1.

11

### 12 **Mice**

13 C57BL/6J mice were purchased from the Jackson Laboratory or CLEA Japan. FIC mice<sup>41</sup>,  
14 and *Ctnnb1*<sup>ΔEx3</sup> mice<sup>42</sup> have been described, and mice backcrossed into the C57BL/6J strain  
15 were used. *Foxp3*<sup>Cre</sup>/*β-ctn*<sup>ΔEx3</sup> mice were studied at 3-5 weeks of age. For high salt diet  
16 (HSD) experiments, six-week-old male wild type mice were fed with normal chow (control  
17 group) or sodium-rich chow containing 4% NaCl (Research Diets; HSD group) with normal  
18 tap water for 3 weeks. Cells were isolated from the spleen and/or mesenteric lymph nodes  
19 and Foxp3<sup>+</sup>Tregs were analyzed by flow cytometry. All experiments were approved by the  
20 University of Tokyo Ethics Committee for Animal Experiments and strictly adhered to the  
21 guidelines for animal experiments of the University of Tokyo.

22

### 23 **Human T cell isolation and culture**

24 Peripheral blood mononuclear cells (PBMCs) were isolated from donors by Ficoll-Paque  
25 PLUS (GE Healthcare) or Lymphoprep (Stemcell) gradient centrifugation. Total CD4<sup>+</sup> T cells  
26 were isolated by negative magnetic selection using a CD4 T cell isolation kit (Stemcell) and  
27 CD4<sup>+</sup>CD25<sup>hi</sup>CD127<sup>low-neg</sup>CD45RO<sup>+</sup> Tregs were sorted on a FACS Aria (BD Biosciences).  
28 Tregs were cultured in RPMI 1640 medium supplemented with 5% Human serum, 2 nM  
29 L-glutamine, 5 mM HEPES, and 100 U/ml penicillin, 100 μg/ml streptomycin, 0.5 mM sodium  
30 pyruvate, 0.05 mM nonessential amino acids, and 5% human AB serum (Gemini  
31 Bio-Products). 96-well round bottom plates (Corning) were pre-coated with anti-human CD3

1 (UCHT1) (1-2 µg/ml) and used for Treg *in vitro* culture with soluble anti-human CD28 (28.2)  
2 (1-5 µg/ml) (BD Bioscience) and human IL-2 (50 U/ml). Human IL-2 was obtained through  
3 the AIDS Research and Reference Reagent Program, Division of AIDS, National Institute of  
4 Allergy and Infectious Diseases (NIAID), National Institutes of Health (NIH). Th1-Tregs  
5 induced with human recombinant IL-12 (20 ng/ml) (R&D). The Wnt/β-catenin inhibitor  
6 PKF115-584 (Tocris) was used at 200 nM and IWR-1 (Tocris) was used at 20 µM. SGK1  
7 inhibitor GSK650394 (Tocris) was used at 10 µM. AKT inhibitor MK2206 (Tocris) was used  
8 5 µM. Frizzled 8 FC chimera protein (R&D) was used at 500 ng/ml.

9

### 10 **Suppression assay**

11 CD4<sup>+</sup>CD25<sup>+</sup> Tregs and CD4<sup>+</sup>CD25<sup>-</sup> T responder cells were isolated from spleen and lymph  
12 node from *Foxp3<sup>Cre</sup>* mice or *Foxp3<sup>Cre</sup>/β-ctn<sup>ΔEx3</sup>* mice by using CD4<sup>+</sup>CD25<sup>+</sup> Regulatory T Cell  
13 Isolation Kit (Miltenyi Biotec). T responder cells were labeled with CFSE and then  
14 co-cultured with Tregs (5 x 10<sup>4</sup>) at 1:1 ratio in RPMI 1640 medium supplemented with 10%  
15 FBS (HyClone), 50 µM 2-Mercaptoethanol (Sigma-Aldrich), 1x GlutaMAX, 50 U/ml  
16 penicillin, and 100 µg/ml streptomycin with Dynabeads Mouse T-Activator CD3/CD28 at  
17 2:1 bead-to-cell ratio. The proliferation of T responder cells was determined at day 4 by  
18 FACS on a Verse instrument (BD Bioscience).

19

### 20 **Quantitative PCR**

21 Total RNA was extracted using RNeasy Micro Kit (QIAGEN), or ZR-96 Quick-RNA kit (Zymo  
22 Research), according to the manufacturer's instructions. RNA was treated with DNase and  
23 reverse transcribed using TaqMan Reverse Transcription Reagents (Applied Biosystems)  
24 or SuperScript IV VILO Master Mix (Invitrogen). cDNAs were amplified with Taqman probes  
25 (Taqman Gene Expression Arrays) and TaqMan Fast Advanced Master Mix on a StepOne  
26 Real-Time PCR System (Applied Biosystems) according to the manufacturer's instructions.  
27 mRNA expression was measured relative to *B2M* expression.

28

### 29 **Flow cytometry analysis**

30 Single-cell suspensions were prepared from PBMCs or mouse tissues and stained with  
31 fixable viability dye for 10 min at RT, followed by staining with surface antibodies for 30 min

1 at 4°C. For intracellular staining, cells were fixed and permeabilized with the Foxp3  
2 Fix/Perm buffer set (eBioscience) for 1 h at 4°C, followed by staining with intracellular  
3 antibodies. For cytokine staining, cells were stimulated with PMA (50 ng/ml) and ionomycin  
4 (for *ex vivo* Tregs; 1000 ng/ml, for *in vitro* cultured Tregs; 250 ng/ml) in the presence of  
5 GolgiPlug (BD Bioscience) for 4 h at 37°C. Antibodies and reagents used for flow  
6 cytometric analysis are listed in Supplementary Table 2. Stained samples were analyzed  
7 with a BD FACS Verse or an LSR Fortessa flow cytometer (BD Bioscience). Data were  
8 analyzed with FlowJo software (Treestar).

9

## 10 **RNA-seq library preparation and data analysis**

### 11 *Preparation of cells for RNA-seq:*

12 For the *ex vivo* Treg subpopulations, CD4<sup>+</sup>CD25<sup>hi</sup>CD127<sup>neg-low</sup>CD45RO<sup>+</sup> memory Tregs  
13 from healthy donors were sorted and immediately stimulated with PMA (50 ng/ml) and  
14 ionomycin (1000 ng/ml) for 4 h. By combining IFN $\gamma$  secretion assay (APC) and IL-10  
15 secretion assay (PE) (Miltenyi), Tregs were labeled based on the expression of IFN $\gamma$  and  
16 IL-10. To avoid RNA degradation, cells were kept in CellCover (Anacyte) before a second  
17 round of sorting. For *in vitro* cultured Tregs in Th1 or high salt conditions, mTregs were  
18 cultured in each condition for four days as described. Cells were harvested and  
19 immediately processed for cDNA preparation. Samples were collected from four healthy  
20 subjects for identification of the Th1 signature and five healthy subjects for identification of  
21 the high salt signature.

### 22 *cDNA and library preparation and sequencing:*

23 cDNAs were generated directly from resorted and harvested cells using the SMART-Seq v4  
24 Ultra Low Input RNA Kit for sequencing (Takara/Clontech). Barcoded libraries were  
25 generated by the Nextera XT DNA Library Preparation kit (Illumina) and sequenced with a 2  
26 x 100 bp paired-end protocol on the HiSeq 2000 Sequencing System (Illumina).

### 27 *RNA-seq data analysis:*

28 RNA-seq analysis was performed using Partek flow (v6.6). First, RNA-seq reads were  
29 trimmed and mapped to the hg19 genome reference using STAR (2.5.0e). Aligned reads  
30 were quantified to the gene level using Partek's E/M algorithm and gene annotation from  
31 Ensembl release 75. Gene-level quantitations were normalized by dividing the gene counts

1 by the total number of reads, following by addition of a small offset (0.001). The offset was  
2 added to enable log2 transformation and the value of the offset was determined by  
3 exploring the data distribution. Differential expression was assessed by fitting Partek's  
4 log-normal model with shrinkage (comparable in performance to limma-trend). Genes  
5 having geometric mean below 1.0 were removed from the analysis.

6  
7 For *ex vivo* Treg subpopulation data, differentially expressed genes (Fold change > 1.5, *P*  
8 value < 0.05) were used for functional analysis using IPA and upstream regulator analysis  
9 (<https://www.qiagenbioinformatics.com/products/ingenuity-pathway-analysis/>). Gene set  
10 enrichment analysis was performed on normalized gene expression counts of RNA-seq  
11 data or microarray data as described previously.

12 For *in vitro* Th1-Treg and high salt Treg data, differentially expressed genes (Fold change >  
13 2, *P* value < 0.05) were used.

14

## 15 **Microarray**

16 For the Oligo DNA microarray analysis, total RNA samples were extracted from sorted  
17 CD4<sup>+</sup>CD25<sup>hi</sup>Tregs of *Foxp3*<sup>Cre</sup> mice or *Foxp3*<sup>Cre</sup>/*β-ctn*<sup>ΔEx3</sup> mice. Microarray analysis was  
18 performed with a 3D-Gene Mouse Oligo chip 24k (Toray Industries Inc., Tokyo, Japan).  
19 Total RNA was labeled with Cy5 by using the Amino Allyl MessageAMP II aRNA  
20 Amplification Kit (Applied Biosystems). The Cy5-labeled aRNA pools were mixed with  
21 hybridization buffer, and hybridized for 16 h. The hybridization signals were obtained by  
22 using a 3D-Gene Scanner and processed by 3D-Gene Extraction software (Toray  
23 Industries Inc.). Detected signals for each gene were normalized with the global  
24 normalization method (the median of the detected signal intensity was adjusted to 25).

25

## 26 **Histology**

27 Mouse tissues were fixed in Ufix (Sakura Finetek Japan) and embedded in paraffin. 6-μm  
28 tissue sections were stained with haematoxylin and eosin.

29

## 30 **Lentiviral transduction for shRNA gene silencing and CRISPR/Cas9-mediated gene** 31 **deletion**



1 Lentiviral plasmids encoding shRNAs were obtained from Sigma-Aldrich and all-in-one  
2 vectors carrying *CTNNB1* sgRNA/Cas9 with GFP reporter were obtained from Applied  
3 Biological Materials. Each plasmid was transformed into One Shot® Stbl3™ chemically  
4 competent cells (Invitrogen) and purified by ZymoPURE plasmid Maxiprep kit (Zymo  
5 research). Lentiviral pseudoparticles were obtained after plasmid transfection of 293FT  
6 cells using Lipofectamine 2000 (Invitrogen). The lentivirus-containing media was harvested  
7 48 or 72 h after transfection and concentrated 40 - 50 times using Lenti-X concentrator  
8 (Takara Clontech). Sorted Tregs were stimulated with plate-bound anti-CD3 (1 µg/ml) and  
9 soluble anti-CD28 (1 µg/ml) for 24 h and transduced with lentiviral particles by spinfection  
10 (1000 x *g* for 90 min at 32°C) in the presence of Polybrene (5 µg/ml) on the plates coated  
11 with Retronectin (50 µg/ml) (Takara/Clontech) and anti-CD3 (1-2 µg/ml). Human Jurkat T  
12 cells were directly transduced with lentiviral particles by spinfection. Five days after  
13 transduction, cells were sorted on the basis of expression of GFP. GFP expressing human  
14 Jurkat T cells were further purified by FACS at least three times before using for  
15 experiments.

16

### 17 **Proximity ligation assay (PLA)**

18 PLA was performed with Duolink In Situ Detection Reagents Orange (Sigma) according to  
19 the manufacturer's recommendation with minor modifications. Tregs were cultured for four  
20 days and harvested, and cells were fixed with 2% paraformaldehyde for 10 min at RT. Fixed  
21 cells were incubated in Foxp3 Fix/Perm buffer set for 30 min at 4°C, followed by staining  
22 with mouse anti-β-catenin and rabbit anti-Foxo1 for 1 h at RT in Foxp3 staining buffer. Cells  
23 were washed and stained in Foxp3 staining buffer with the secondary mouse PLUS and  
24 rabbit MINUS antibodies for 30 min at RT. Cells were washed in TBS (0.01 M Tris, 0.15 M  
25 NaCl) with 0.5% BSA and the ligation reaction was performed at 37°C for 30 min, followed  
26 by the amplification reaction at 37°C for 100 min. Cells were washed in TBS (0.2 M Tris, 0.1  
27 M NaCl) with 0.5% BSA and stained with anti-Foxp3 antibody for 30 min at 4°C. Cells were  
28 analyzed with a 60x or 100x objective on a Leica DM6000 CS confocal microscope.

29

### 30 **Statistical analysis**



1 All statistical analyses were performed using GraphPad Prism 6 (GraphPad Software).  
2 Detailed information about statistical analysis, including tests and values used, is provided  
3 in the figure legends. Values of  $P < 0.05$  or less were considered significant.

4

5 **Data availability statement**

6 The data that support the findings of this study are available from the corresponding  
7 authors upon request.

8

9

## 1 Reference

- 2 1. Sakaguchi S, Ono M, Setoguchi R, Yagi H, Hori S, Fehervari Z, *et al.* Foxp3+ CD25+  
3 CD4+ natural regulatory T cells in dominant self-tolerance and autoimmune disease.  
4 *Immunol Rev* 2006, **212**: 8-27.  
5
- 6 2. Bennett CL, Christie J, Ramsdell F, Brunkow ME, Ferguson PJ, Whitesell L, *et al.* The  
7 immune dysregulation, polyendocrinopathy, enteropathy, X-linked syndrome (IPEX) is  
8 caused by mutations of FOXP3. *Nat Genet* 2001, **27**(1): 20-21.  
9
- 10 3. Lahl K, Loddenkemper C, Drouin C, Freyer J, Arnason J, Eberl G, *et al.* Selective  
11 depletion of Foxp3+ regulatory T cells induces a scurfy-like disease. *J Exp Med* 2007,  
12 **204**(1): 57-63.  
13
- 14 4. Viglietta V, Baecher-Allan C, Weiner HL, Hafler DA. Loss of functional suppression by  
15 CD4+CD25+ regulatory T cells in patients with multiple sclerosis. *J Exp Med* 2004,  
16 **199**(7): 971-979.  
17
- 18 5. Buckner JH. Mechanisms of impaired regulation by CD4(+)CD25(+)FOXP3(+)  
19 regulatory T cells in human autoimmune diseases. *Nat Rev Immunol* 2010, **10**(12):  
20 849-859.  
21
- 22 6. Vignali DA, Collison LW, Workman CJ. How regulatory T cells work. *Nat Rev Immunol*  
23 2008, **8**(7): 523-532.  
24
- 25 7. Miyara M, Yoshioka Y, Kitoh A, Shima T, Wing K, Niwa A, *et al.* Functional delineation  
26 and differentiation dynamics of human CD4+ T cells expressing the FoxP3 transcription  
27 factor. *Immunity* 2009, **30**(6): 899-911.  
28
- 29 8. Dominguez-Villar M, Baecher-Allan CM, Hafler DA. Identification of T helper type 1-like,  
30 Foxp3+ regulatory T cells in human autoimmune disease. *Nat Med* 2011, **17**(6):  
31 673-675.

- 1
- 2 9. McClymont SA, Putnam AL, Lee MR, Esensten JH, Liu W, Hulme MA, *et al.* Plasticity of  
3 human regulatory T cells in healthy subjects and patients with type 1 diabetes. *J*  
4 *Immunol* 2011, **186**(7): 3918-3926.
- 5
- 6 10. Lowther DE, Goods BA, Lucca LE, Lerner BA, Raddassi K, van Dijk D, *et al.* PD-1  
7 marks dysfunctional regulatory T cells in malignant gliomas. *JCI Insight* 2016, **1**(5).
- 8
- 9 11. Rubtsov YP, Rasmussen JP, Chi EY, Fontenot J, Castelli L, Ye X, *et al.* Regulatory T  
10 cell-derived interleukin-10 limits inflammation at environmental interfaces. *Immunity*  
11 2008, **28**(4): 546-558.
- 12
- 13 12. Laidlaw BJ, Cui W, Amezcua RA, Gray SM, Guan T, Lu Y, *et al.* Production of IL-10 by  
14 CD4(+) regulatory T cells during the resolution of infection promotes the maturation of  
15 memory CD8(+) T cells. *Nat Immunol* 2015, **16**(8): 871-879.
- 16
- 17 13. Marson A, Housley WJ, Hafler DA. Genetic basis of autoimmunity. *J Clin Invest* 2015,  
18 **125**(6): 2234-2241.
- 19
- 20 14. International Multiple Sclerosis Genetics C, Hafler DA, Compston A, Sawcer S, Lander  
21 ES, Daly MJ, *et al.* Risk alleles for multiple sclerosis identified by a genomewide study.  
22 *N Engl J Med* 2007, **357**(9): 851-862.
- 23
- 24 15. International Multiple Sclerosis Genetics C, Nikolaos Patsopoulos, Sergio E. Baranzini,  
25 Adam Santaniello PS, Chris Cotsapas, Garrett Wong, Ashley H. Beecham, Tojo James,  
26 Joseph Replogle, Ioannis Vlachos, Cristin McCabe, Tune Pers, Aaron Brandes, Charles  
27 White, Brendan Keenan, Maria Cimpean, Phoebe Winn, Ioannis-Pavlos Panteliadis,  
28 Allison Robbins, Till F. M. Andlauer, Onigiusz Zarzycki, Benedicte Dubois, An Goris,  
29 Helle Bach Sondergaard, Finn Sellebjerg, Per Soelberg Sorensen, Henrik Ullum, Lise  
30 Wegner Thoerner, Janna Saarela, Isabelle Cournu-Rebeix, Vincent Damotte, Bertrand  
31 Fontaine, Lena Guillot-Noel, Mark Lathrop, Sandra Vukusik, Achim Berthele, Viola

1 Biberacher, Dorothea Buck, Christiane Gasperi, Christiane Graetz, Verena Grummel,  
2 Bernhard Hemmer, Muni Hoshi, Benjamin Knier, Thomas Korn, Christina M Lill, Felix  
3 Luessi, Mark Muhlau, Frauke Zipp, Efthimios Dardiotis, Cristina Agliardi, Antonio  
4 Amoroso, Nadia Barizzzone, Maria Donata Benedetti, Luisa Bernardinelli, Paola Cavalla,  
5 Ferdinando Clarelli, Giancarlo Comi, Daniele Cusi, Federica Esposito, Laura Ferre,  
6 Daniela Galimberti, Clara Guaschino, Maurizio A. Leone, Vittorio Martinelli, Lucia  
7 Moiola, Marco Salvetti, Melissa Sorosina, Domizia Vecchio, Andrea Zauli, Silvia  
8 Santoro, Miriam Zuccala, Julia Mescheriakova, Cornelia van Duijn, Steffan D. Bos,  
9 Elisabeth G. Celius, Anne Spurkland, Manuel Comabella, Xavier Montalban, Lars  
10 Alfredsson, Izaura L. Bomfim, David Gomez-Cabrero, Jan Hillert, Maja Jagodic,  
11 Magdalena Linden, Fredrik Piehl, Ilijas Jelcic, Roland Martin, Mireia Sospedra, Amie  
12 Baker, Maria Ban, Clive Hawkins, Pirro Hysi, Seema Kalra, Fredrik Karpe, Jyoti  
13 Khadake, Genevieve Lachance, Paul Molyneux, Matthew Neville, John Thorpe,  
14 Elizabeth Bradshaw, Stacy J. Caillier, Peter Calabresi, Bruce A. C. Cree, Anne Cross,  
15 Mary F. Davis, Paul de Bakker, Silvia Delgado, Marieme Dembele, Keith Edwards, Kate  
16 Fitzgerald, Irene Y. Frohlich, Pierre-Antoine Gourraud, Jonathan L. Haines, Hakon  
17 Hakonarson, Dorlan Kimbrough, Noriko Isobe, Ioanna Konidari, Ellen Lathi, Michelle H.  
18 Lee, Taibo Li, David An, Andrew Zimmer, Albert Lo, Lohith Madireddy, Clara P.  
19 Manrique, Mitja Mitrovic, Marta Olah, Ellis Patrick, Margaret A. Pericak-Vance, Laura  
20 Piccio, Cathy Schaefer, Howard Weiner, Kasper Lage, - ANZgene, - IIBDGC, -  
21 WTCCC2, Alastair Compston, David Hafler, Hanne F. Harbo, Stephen L. Hauser,  
22 Graeme Stewart, Sandra D'Alfonso, Georgios Hadjigeorgiou, Bruce Taylor, Lisa F.  
23 Barcellos, David Booth, Rogier Hintzen, Ingrid Kockum, Filippo Martinelli-Boneschi,  
24 Jacob L. McCauley, Jorge R. Oksenberg, Annette Oturai, Stephen Sawcer, Adrian J.  
25 Ivinson, Tomas Olsson, Philip L. De Jager. The Multiple Sclerosis Genomic Map: Role  
26 of peripheral immune cells and resident microglia in susceptibility. *bioRxiv* 2017,  
27 <https://www.biorxiv.org/content/early/2017/07/13/143933>.

28

29 16. Olsson T, Barcellos LF, Alfredsson L. Interactions between genetic, lifestyle and  
30 environmental risk factors for multiple sclerosis. *Nat Rev Neurol* 2017, **13**(1): 25-36.

31

- 1 17. Kleinewietfeld M, Manzel A, Titze J, Kvakana H, Yosef N, Linker RA, *et al.* Sodium  
2 chloride drives autoimmune disease by the induction of pathogenic TH17 cells. *Nature*  
3 2013, **496**(7446): 518-522.  
4
- 5 18. Wu C, Yosef N, Thalhammer T, Zhu C, Xiao S, Kishi Y, *et al.* Induction of pathogenic  
6 TH17 cells by inducible salt-sensing kinase SGK1. *Nature* 2013, **496**(7446): 513-517.  
7
- 8 19. Hernandez AL, Kitz A, Wu C, Lowther DE, Rodriguez DM, Vudattu N, *et al.* Sodium  
9 chloride inhibits the suppressive function of FOXP3+ regulatory T cells. *J Clin Invest*  
10 2015, **125**(11): 4212-4222.  
11
- 12 20. Wei Y, Lu C, Chen J, Cui G, Wang L, Yu T, *et al.* High salt diet stimulates gut Th17  
13 response and exacerbates TNBS-induced colitis in mice. *Oncotarget* 2017, **8**(1): 70-82.  
14
- 15 21. Tubbs AL, Liu B, Rogers TD, Sartor RB, Miao EA. Dietary Salt Exacerbates  
16 Experimental Colitis. *J Immunol* 2017, **199**(3): 1051-1059.  
17
- 18 22. Paling D, Solanky BS, Riemer F, Tozer DJ, Wheeler-Kingshott CA, Kapoor R, *et al.*  
19 Sodium accumulation is associated with disability and a progressive course in multiple  
20 sclerosis. *Brain* 2013, **136**(Pt 7): 2305-2317.  
21
- 22 23. Fitzgerald KC, Munger KL, Hartung HP, Freedman MS, Montalban X, Edan G, *et al.*  
23 Sodium intake and multiple sclerosis activity and progression in BENEFIT. *Ann Neurol*  
24 2017, **82**(1): 20-29.  
25
- 26 24. Clevers H. Wnt/beta-catenin signaling in development and disease. *Cell* 2006, **127**(3):  
27 469-480.  
28
- 29 25. Naito AT, Sumida T, Nomura S, Liu ML, Higo T, Nakagawa A, *et al.* Complement C1q  
30 activates canonical Wnt signaling and promotes aging-related phenotypes. *Cell* 2012,  
31 **149**(6): 1298-1313.

- 1
- 2 26. Niehrs C. The complex world of WNT receptor signalling. *Nat Rev Mol Cell Biol* 2012,
- 3 13(12): 767-779.
- 4
- 5 27. Staal FJ, Luis TC, Tiemessen MM. WNT signalling in the immune system: WNT is
- 6 spreading its wings. *Nat Rev Immunol* 2008, 8(8): 581-593.
- 7
- 8 28. Ding Y, Shen S, Lino AC, Curotto de Lafaille MA, Lafaille JJ. Beta-catenin stabilization
- 9 extends regulatory T cell survival and induces anergy in nonregulatory T cells. *Nat Med*
- 10 2008, 14(2): 162-169.
- 11
- 12 29. van Loosdregt J, Fleskens V, Tiemessen MM, Mokry M, van Boxtel R, Meeding J, *et al.*
- 13 Canonical Wnt signaling negatively modulates regulatory T cell function. *Immunity* 2013,
- 14 39(2): 298-310.
- 15
- 16 30. Keerthivasan S, Aghajani K, Dose M, Molinero L, Khan MW, Venkateswaran V, *et al.*
- 17 beta-Catenin promotes colitis and colon cancer through imprinting of proinflammatory
- 18 properties in T cells. *Sci Transl Med* 2014, 6(225): 225ra228.
- 19
- 20 31. Sorcini D, Bruscoli S, Frammartino T, Cimino M, Mazzon E, Galuppo M, *et al.*
- 21 Wnt/beta-Catenin Signaling Induces Integrin alpha4beta1 in T Cells and Promotes a
- 22 Progressive Neuroinflammatory Disease in Mice. *J Immunol* 2017, 199(9): 3031-3041.
- 23
- 24 32. Kitz A, de Marcken M, Gautron AS, Mitrovic M, Hafler DA, Dominguez-Villar M. AKT
- 25 isoforms modulate Th1-like Treg generation and function in human autoimmune
- 26 disease. *EMBO Rep* 2016, 17(8): 1169-1183.
- 27
- 28 33. Dias S, D'Amico A, Cretney E, Liao Y, Tellier J, Bruggeman C, *et al.* Effector Regulatory
- 29 T Cell Differentiation and Immune Homeostasis Depend on the Transcription Factor
- 30 Myb. *Immunity* 2017, 46(1): 78-91.
- 31

- 1 34. Kitagawa Y, Ohkura N, Kidani Y, Vandenbon A, Hirota K, Kawakami R, *et al.* Guidance  
2 of regulatory T cell development by Satb1-dependent super-enhancer establishment.  
3 *Nat Immunol* 2017, **18**(2): 173-183.  
4
- 5 35. Wu Y, Borde M, Heissmeyer V, Feuerer M, Lapan AD, Stroud JC, *et al.* FOXP3 controls  
6 regulatory T cell function through cooperation with NFAT. *Cell* 2006, **126**(2): 375-387.  
7
- 8 36. Pabbisetty SK, Rabacal W, Volanakis EJ, Parekh VV, Olivares-Villagomez D, Cendron  
9 D, *et al.* Peripheral tolerance can be modified by altering KLF2-regulated Treg migration.  
10 *Proc Natl Acad Sci U S A* 2016, **113**(32): E4662-4670.  
11
- 12 37. Lengfeld JE, Lutz SE, Smith JR, Diaconu C, Scott C, Kofman SB, *et al.* Endothelial  
13 Wnt/beta-catenin signaling reduces immune cell infiltration in multiple sclerosis. *Proc*  
14 *Natl Acad Sci U S A* 2017, **114**(7): E1168-E1177.  
15
- 16 38. Tawk M, Makoukji J, Belle M, Fonte C, Trousson A, Hawkins T, *et al.* Wnt/beta-catenin  
17 signaling is an essential and direct driver of myelin gene expression and  
18 myelinogenesis. *J Neurosci* 2011, **31**(10): 3729-3742.  
19
- 20 39. Staal FJ, van Noort M, Strous GJ, Clevers HC. Wnt signals are transmitted through  
21 N-terminally dephosphorylated beta-catenin. *EMBO Rep* 2002, **3**(1): 63-68.  
22
- 23 40. Duhon T, Duhon R, Lanzavecchia A, Sallusto F, Campbell DJ. Functionally distinct  
24 subsets of human FOXP3+ Treg cells that phenotypically mirror effector Th cells. *Blood*  
25 2012, **119**(19): 4430-4440.  
26
- 27 41. Wing K, Onishi Y, Prieto-Martin P, Yamaguchi T, Miyara M, Fehervari Z, *et al.* CTLA-4  
28 control over Foxp3+ regulatory T cell function. *Science* 2008, **322**(5899): 271-275.  
29
- 30 42. Harada N, Tamai Y, Ishikawa T, Sauer B, Takaku K, Oshima M, *et al.* Intestinal polyposis  
31 in mice with a dominant stable mutation of the beta-catenin gene. *EMBO J* 1999,

- 1       **18**(21): 5931-5942.
- 2
- 3   43. Sebastian M, Lopez-Ocasio M, Metidji A, Rieder SA, Shevach EM, Thornton AM. Helios
- 4       Controls a Limited Subset of Regulatory T Cell Functions. *J Immunol* 2016, **196**(1):
- 5       144-155.
- 6
- 7   44. Essers MA, de Vries-Smits LM, Barker N, Polderman PE, Burgering BM, Korswagen
- 8       HC. Functional interaction between beta-catenin and FOXO in oxidative stress
- 9       signaling. *Science* 2005, **308**(5725): 1181-1184.
- 10
- 11   45. Okada K, Naito AT, Higo T, Nakagawa A, Shibamoto M, Sakai T, *et al.* Wnt/beta-Catenin
- 12       Signaling Contributes to Skeletal Myopathy in Heart Failure via Direct Interaction With
- 13       Forkhead Box O. *Circ Heart Fail* 2015, **8**(4): 799-808.
- 14
- 15   46. Ouyang W, Liao W, Luo CT, Yin N, Huse M, Kim MV, *et al.* Novel Foxo1-dependent
- 16       transcriptional programs control T(reg) cell function. *Nature* 2012, **491**(7425): 554-559.
- 17
- 18   47. Dehner M, Hadjihannas M, Weiske J, Huber O, Behrens J. Wnt signaling inhibits
- 19       Forkhead box O3a-induced transcription and apoptosis through up-regulation of serum-
- 20       and glucocorticoid-inducible kinase 1. *J Biol Chem* 2008, **283**(28): 19201-19210.
- 21
- 22   48. Wang R, Ferraris JD, Izumi Y, Dmitrieva N, Ramkissoon K, Wang G, *et al.* Global
- 23       discovery of high-NaCl-induced changes of protein phosphorylation. *Am J Physiol Cell*
- 24       *Physiol* 2014, **307**(5): C442-454.
- 25
- 26   49. Irarrazabal CE, Burg MB, Ward SG, Ferraris JD. Phosphatidylinositol 3-kinase mediates
- 27       activation of ATM by high NaCl and by ionizing radiation: Role in osmoprotective
- 28       transcriptional regulation. *Proc Natl Acad Sci U S A* 2006, **103**(23): 8882-8887.
- 29
- 30   50. Fang D, Hawke D, Zheng Y, Xia Y, Meisenhelder J, Nika H, *et al.* Phosphorylation of
- 31       beta-catenin by AKT promotes beta-catenin transcriptional activity. *J Biol Chem* 2007,



- 1       **282**(15): 11221-11229.
- 2
- 3   51. McCubrey JA, Steelman LS, Bertrand FE, Davis NM, Abrams SL, Montalto G, *et al.*
- 4       Multifaceted roles of GSK-3 and Wnt/beta-catenin in hematopoiesis and
- 5       leukemogenesis: opportunities for therapeutic intervention. *Leukemia* 2014, **28**(1):
- 6       15-33.
- 7
- 8   52. Fang X, Yu SX, Lu Y, Bast RC, Jr., Woodgett JR, Mills GB. Phosphorylation and
- 9       inactivation of glycogen synthase kinase 3 by protein kinase A. *Proc Natl Acad Sci U S*
- 10      A 2000, **97**(22): 11960-11965.
- 11
- 12   53. Wehbi VL, Tasken K. Molecular Mechanisms for cAMP-Mediated Immunoregulation in T
- 13      cells - Role of Anchored Protein Kinase A Signaling Units. *Front Immunol* 2016, **7**: 222.
- 14
- 15   54. Lund RJ, Loytomaki M, Naumanen T, Dixon C, Chen Z, Ahlfors H, *et al.* Genome-wide
- 16      identification of novel genes involved in early Th1 and Th2 cell differentiation. *J*
- 17      *Immunol* 2007, **178**(6): 3648-3660.
- 18
- 19   55. Boniface K, Bak-Jensen KS, Li Y, Blumenschein WM, McGeachy MJ, McClanahan TK,
- 20      *et al.* Prostaglandin E2 regulates Th17 cell differentiation and function through cyclic
- 21      AMP and EP2/EP4 receptor signaling. *J Exp Med* 2009, **206**(3): 535-548.
- 22
- 23   56. Kofler DM, Marson A, Dominguez-Villar M, Xiao S, Kuchroo VK, Hafler DA. Decreased
- 24      RORC-dependent silencing of prostaglandin receptor EP2 induces autoimmune Th17
- 25      cells. *J Clin Invest* 2014, **124**(6): 2513-2522.
- 26
- 27   57. Li X, Murray F, Koide N, Goldstone J, Dann SM, Chen J, *et al.* Divergent requirement for
- 28      Galphas and cAMP in the differentiation and inflammatory profile of distinct mouse Th
- 29      subsets. *J Clin Invest* 2012, **122**(3): 963-973.
- 30
- 31   58. Sreeramkumar V, Fresno M, Cuesta N. Prostaglandin E2 and T cells: friends or foes?

- 1        *Immunol Cell Biol* 2012, **90**(6): 579-586.
- 2
- 3    59. Yao C, Hirata T, Soontrapa K, Ma X, Takemori H, Narumiya S. Prostaglandin E(2)
- 4        promotes Th1 differentiation via synergistic amplification of IL-12 signalling by cAMP
- 5        and PI3-kinase. *Nat Commun* 2013, **4**: 1685.
- 6
- 7    60. Shin H, Kwack MH, Shin SH, Oh JW, Kang BM, Kim AA, *et al.* Identification of
- 8        transcriptional targets of Wnt/beta-catenin signaling in dermal papilla cells of human
- 9        scalp hair follicles: EP2 is a novel transcriptional target of Wnt3a. *J Dermatol Sci* 2010,
- 10       **58**(2): 91-96.
- 11
- 12   61. Castellone MD, Teramoto H, Williams BO, Druey KM, Gutkind JS. Prostaglandin E2
- 13        promotes colon cancer cell growth through a Gs-axin-beta-catenin signaling axis.
- 14        *Science* 2005, **310**(5753): 1504-1510.
- 15
- 16   62. Notani D, Gottimukkala KP, Jayani RS, Limaye AS, Damle MV, Mehta S, *et al.* Global
- 17        regulator SATB1 recruits beta-catenin and regulates T(H)2 differentiation in
- 18        Wnt-dependent manner. *PLoS Biol* 2010, **8**(1): e1000296.
- 19
- 20   63. Pappalardo JL, Hafler DA. The Human Functional Genomics Project: Understanding
- 21        Generation of Diversity. *Cell* 2016, **167**(4): 894-896.
- 22
- 23   64. Wilck N, Matus MG, Kearney SM, Olesen SW, Forslund K, Bartolomaeus H, *et al.*
- 24        Salt-responsive gut commensal modulates TH17 axis and disease. *Nature* 2017.
- 25
- 26   65. Vojdani A. A Potential Link between Environmental Triggers and Autoimmunity.
- 27        *Autoimmune Dis* 2014, **2014**: 437231.
- 28
- 29   66. Shao J, Jung C, Liu C, Sheng H. Prostaglandin E2 Stimulates the beta-catenin/T cell
- 30        factor-dependent transcription in colon cancer. *J Biol Chem* 2005, **280**(28):
- 31        26565-26572.

- 1
- 2 67. Mahic M, Yaqub S, Johansson CC, Tasken K, Aandahl EM. FOXP3+CD4+CD25+
- 3 adaptive regulatory T cells express cyclooxygenase-2 and suppress effector T cells by
- 4 a prostaglandin E2-dependent mechanism. *J Immunol* 2006, **177**(1): 246-254.
- 5
- 6 68. Kihara Y, Matsushita T, Kita Y, Uematsu S, Akira S, Kira J, *et al*. Targeted lipidomics
- 7 reveals mPGES-1-PGE2 as a therapeutic target for multiple sclerosis. *Proc Natl Acad*
- 8 *Sci U S A* 2009, **106**(51): 21807-21812.
- 9
- 10
- 11

## 1 **Acknowledgements**

2 We thank L. Devine, C. Wang, and H. Tomita for cell sorting, and Ee-chun Cheng and M.  
3 Zhang for preparation of the RNA-seq library, K. Tanaka for microscopic imaging, and M.  
4 Shimizu, H. Taniwaki, and N. Yamanaka for technical support. FIC mice were a generous  
5 gift from S. Sakaguchi (Osaka University). This work was supported by grants from the  
6 Uehara Memorial Foundation Research Fellowship, MSD Life Science Foundation  
7 Research Fellowship, LEGEND Study Abroad Grant from BioLegend and Tomy Digital  
8 Biology (to T.S.), the Ministry of Education, Culture, Sports, Science and Technology  
9 (MEXT); JSPS KAKENHI (Grant Number 21229010), the Core Research for Evolutional  
10 Science and Technology (CREST) program from the Japan Science and Technology  
11 Agency (to I.K.), National Institutes of Health Grants (P01 AI045757, U19 AI046130, U19  
12 AI070352, and P01 AI039671), and the Nancy Taylor Foundation for Chronic Diseases (to  
13 D.A.H.). RNA sequencing service was conducted at Yale Stem Cell Center Genomics Core  
14 facility that was supported by the Connecticut Regenerative Medicine Research Fund and  
15 the Li Ka Shing Foundation.

16

## 17 **Contributions**

18 T.S., D.M.R., and C.M.U. performed *in vitro* experiments with the help of M.R.L. and M.D.V.;  
19 T.S. and A.T.N. performed *in vivo* experiments with the help of H.A. and T.N.; T.S. and  
20 M.R.L. analyzed the RNA-seq data under the supervision of D.A.H.; T.S. performed data  
21 analysis and wrote the manuscript under the supervision of A.T.N., I.K., M.R.L., M.D.V., and  
22 D.A.H.; A.T.N., I.K., M.D.V. and D.A.H. supervised the overall study.

23

## 24 **Competing interests**

25 The authors declare no competing financial interests.

26

## 27 **Corresponding author**

28 Correspondence to Tomokazu Sumida.

## 1 **Figure legends**

2

### 3 **Figure 1**

#### 4 **IFN $\gamma$ /IL-10 balance of human Tregs in MS and high salt treatment**

5 **(a)** Representative flow cytometric analysis of *ex vivo* human Tregs  
6 (CD4<sup>+</sup>CD25<sup>hi</sup>CD127<sup>neg</sup>CD45RO<sup>+</sup>) isolated from healthy donor and MS patient. FACS  
7 isolated Tregs were stimulated with PMA/ionomycin for 4 h followed by intracellular  
8 staining for IFN $\gamma$  and IL-10. **(b)** IFN $\gamma$  and IL-10 cytokine profiles of *ex vivo* human Tregs.  
9 Percentage of IFN $\gamma$  and/or IL-10 producing Tregs was shown (left). Ratio between IFN $\gamma$   
10 positive and IL-10 positive Tregs was plotted (right). (HC; n=12, MS; n=14) \* $P$ <0.05,  
11 \*\* $P$ <0.01 (two-way ANOVA with Sidak's multiple comparisons test). **(c)** *IFNG* and *IL10* gene  
12 expression was determined on *ex vivo* Tregs by qPCR. Ratio between *IFNG* and *IL10*  
13 expression was shown at the right (HC; n=36, MS; n=27). \*\* $P$ <0.01 (two-tailed unpaired  
14 Student's *t*-test). **(d)** Representative flow cytometric analysis of IFN $\gamma$  and IL-10 production  
15 in human Tregs stimulated with anti-CD3 and anti-CD28 in the normal media (Control) or  
16 media supplemented with additional 40 mM NaCl (NaCl) for 96 h. Percentage of IFN $\gamma$   
17 and/or IL-10 producing Tregs was shown at the right (n=21 subjects). **(e)** *IFNG* and *IL10*  
18 mRNA expression was assessed at 96 h following stimulation as in **(d)** (n=41 subjects).  
19 Ratio between *IFNG* and *IL10* expression was plotted (right). \* $P$ <0.05, \*\* $P$ <0.01 (two-tailed  
20 unpaired Student's *t*-test). **(f)** mRNA expression kinetics of *IFNG* and *IL10* from 9 different  
21 time points were plotted. Data were represented as mean  $\pm$  SEM (n=6 subjects). \* $P$ <0.05,  
22 \*\* $P$ <0.01, \*\*\* $P$ <0.001 (two-way ANOVA with Sidak's multiple comparisons test).

23

### 24 **Figure 2**

#### 25 **Transcriptional profiling of IFN $\gamma$ /IL-10 producing human Treg subsets**

26 **(a)** Experimental workflow for RNA-seq with IFN $\gamma$ /IL10 producing Treg subpopulations. **(b)**  
27 Heatmap of 672 differentially expressed genes between IFN $\gamma$ SP and IL10SP. 10 clusters  
28 are identified and representative genes for each cluster are shown. **(c)** Lists of the  
29 top-ranking genes identified by IPA analysis as upstream regulators between each Treg  
30 subpopulations. Tables show statistically significant (overlap  $P$  value <0.05) upstream  
31 regulators in each comparison (Genes that could not be calculated for fold change were

1 blank). *CTNNB1* gene, which codes  $\beta$ -catenin protein, was highlighted in red. **(d)** GSEA  
2 enrichment plots of KEGG Wnt signaling pathway between  $\text{INF}\gamma\text{SP}$  vs. DN and  $\text{INF}\gamma\text{SP}$  vs.  
3  $\text{IL10SP}$ . Normalized enrichment score (NES) and false discovery rate (FDR) were  
4 represented at the bottom of each plot.

5

### 6 **Figure 3**

#### 7 **$\beta$ -catenin is stabilized in the $\text{INF}\gamma$ secreting Treg population**

8 **(a)** Relative expression level of Active  $\beta$ -catenin (ABC) on *ex vivo* Treg subpopulations  
9 analyzed by flow cytometry (n=11 subjects). Fold change in gMFI over DN were depicted.  
10 \* $P$ <0.05, \*\* $P$ <0.01 (one-way ANOVA with Tukey's multiple comparisons test). gMFI,  
11 geometric mean fluorescence intensity. **(b)** Expression level of ABC between  $\text{CXCR3}^-$  and  
12  $\text{CXCR3}^+$  *ex vivo* Tregs from healthy controls. Representative histogram (left) and summary  
13 of results (n=7 subjects) (right). \* $P$ <0.05 (two-tailed paired Student's *t*-test). **(c)** Gene  
14 expression of Wnt/ $\beta$ -catenin signaling target genes (*AXIN2* and *TCF7*) assessed by  
15 RNA-seq. \* $P$ <0.05, \*\* $P$ <0.01 (one-way ANOVA with Tukey's multiple comparisons test). **(d)**  
16 Relative expression level of ABC on Tregs stimulated with anti-CD3 and anti-CD28 for 4  
17 days, followed by 4 h PMA/iomomycin stimulation and intracellular cytokine staining for  
18  $\text{INF}\gamma$  and IL-10 (n=12 subjects). Fold change in gMFI over DN were depicted. \* $P$ <0.05,  
19 \*\* $P$ <0.01, \*\*\* $P$ <0.001 (one-way ANOVA with Tukey's multiple comparisons test). **(e)**  
20 Expression level of  $\beta$ -catenin on Tregs stimulated with anti-CD3 and anti-CD28 in the  
21 presence (Th1) or absence (Th0) of IL-12 for 4 days.  $\beta$ -catenin level was determined  
22 directly by intracellular staining (left) (n=9 subjects) and  $\beta$ -catenin level on  $\text{INF}\gamma$   
23 positive/negative Treg populations was determined after 4 h PMA/iomomycin stimulation  
24 (middle) (n=4 subjects). Representative histogram for  $\beta$ -catenin expression was shown  
25 (right). \* $P$ <0.05 (two-tailed unpaired Student's *t*-test). **(f, g)** Frequency of  $\text{INF}\gamma$  and IL-10  
26 positive cell number **(f)** and gene expression of *IFNG* and *IL10* by qPCR **(g)**. Tregs were  
27 stimulated with anti-CD3 and anti-CD28 in the presence of Wnt/ $\beta$ -catenin signaling inhibitor  
28 PKF115-584 (PKF), IL-12 (Th1), or IL-12 and PKF115-584 (Th1+PKF) (n=4 subjects)  
29 \* $P$ <0.05, \*\* $P$ <0.01, \*\*\* $P$ <0.001 (one-way ANOVA with Tukey's multiple comparisons test).  
30 **(h, i)** Relative frequency of  $\text{INF}\gamma$  and IL-10 positive cell number (fold of scramble  
31 shRNA/control condition) **(h)** and gene expression of *IFNG* and *IL10* by qPCR **(i)**. Tregs

1 were transduced with a non-targeted shRNA or a *CTNNB1* shRNA and cultured in Th0 or  
2 Th1 condition for 5 days (**h**; n=7 subjects, **i**; n=5 subjects). \* $P < 0.05$ , \*\* $P < 0.01$  (one-way  
3 ANOVA with Tukey's multiple comparisons test). Data are representative of two  
4 experiments (**e** (middle), and **f**) or are from more than three experiments.

5

## 6 **Figure 4**

### 7 **Treg specific activation of $\beta$ -catenin induces IFN $\gamma$ secreting dysfunctional phenotype** 8 **with Scurfy-like autoimmunity**

9 **(a)** Flow cytometric analysis of  $\beta$ -catenin in splenic CD4<sup>+</sup>Foxp3<sup>+</sup> Tregs from  
10 Foxp3-IRES-Cre/wild-type mice (*Foxp3<sup>Cre</sup>*) and Foxp3-IRES-Cre/*Cttnb1 $\Delta$ Ex3*  
11 (*Foxp3<sup>Cre</sup>/ $\beta$ -ctn $\Delta$ Ex3*) mice. Dashed lane is for isotope control. **(b)** Images of 4-week-old  
12 *Foxp3<sup>Cre</sup>* mouse and *Foxp3<sup>Cre</sup>/ $\beta$ -ctn $\Delta$ Ex3* mouse (left). Representative pictures of thymus,  
13 peripheral lymph nodes, and spleens isolated from 4 week-old *Foxp3<sup>Cre</sup>* or  
14 *Foxp3<sup>Cre</sup>/ $\beta$ -ctn $\Delta$ Ex3* mice. **(c)** Hematoxylin and eosin staining of thymus, spleen, liver,  
15 intestine, pancreas, and lung sections from 4 week-old *Foxp3<sup>Cre</sup>* and *Foxp3<sup>Cre</sup>/ $\beta$ -ctn $\Delta$ Ex3*  
16 mice. Scale bars, 300  $\mu$ m in the lower magnification and 150 $\mu$ m in the higher magnification.  
17 **(d)** Survival of *Foxp3<sup>Cre</sup>* and *Foxp3<sup>Cre</sup>/ $\beta$ -ctn $\Delta$ Ex3* mice. **(e)** Representative histogram of CFSE  
18 dilution for Treg suppression assay. Yellow; *Foxp3<sup>Cre</sup>* Teff only, Blue; *Foxp3<sup>Cre</sup>* Tregs and  
19 *Foxp3<sup>Cre</sup>* Teff at 1:1 ratio, Red; *Foxp3<sup>Cre</sup>/ $\beta$ -ctn $\Delta$ Ex3* Tregs and *Foxp3<sup>Cre</sup>* Teff at 1:1 ratio (left).  
20 Bar graph shows percentage of suppression (right) (n=3) \* $P < 0.05$  (two-tailed unpaired  
21 Student's *t*-test). **(f)** Gene expression profile of *Foxp3<sup>Cre</sup>* and *Foxp3<sup>Cre</sup>/ $\beta$ -ctn $\Delta$ Ex3* Tregs by  
22 microarray analysis. **(g)** Flow cytometric analysis on peripheral lymph node Tregs from  
23 *Foxp3<sup>Cre</sup>* and *Foxp3<sup>Cre</sup>/ $\beta$ -ctn $\Delta$ Ex3* mice. Quantification of gMFI for indicated molecules was  
24 shown. (*Foxp3<sup>Cre</sup>*; n=4, *Foxp3<sup>Cre</sup>/ $\beta$ -ctn $\Delta$ Ex3*; n=4 or 5). **(h)** Representative  
25 immunofluorescence images of human Tregs with PLA signal for  $\beta$ -catenin-Foxo1  
26 interaction (red) and Foxp3 staining (green). Nuclei were stained with DAPI (blue).

27

## 28 **Figure 5**

### 29 **High salt environment induces $\beta$ -catenin signal activation and IFN $\gamma$ /IL-10 cytokine** 30 **imbalance**

31 **(a)** Flow cytometric analysis of ABC, phospho-SGK1 (Thr256), and phospho-Foxo1

1 (Ser256) expression in human IFN $\gamma$ -producing Tregs. Tregs were stimulated with anti-CD3  
2 and anti-CD28 in the presence (NaCl) or absence (Control) of additional 40 mM NaCl for 96  
3 h followed by 4 h PMA/iomomycin stimulation (n=13-18 subjects). \* $P$ <0.05, \*\* $P$ <0.01  
4 (two-tailed unpaired Student's  $t$ -test). **(b)** mRNA expression kinetics for Wnt/ $\beta$ -catenin  
5 target genes (*AXIN2* and *TCF7*) from 9 time points were plotted and each dots represent  
6 the average of 4 different experiments. \* $P$ <0.05, \*\* $P$ <0.01, \*\*\* $P$ <0.001 (two-way ANOVA  
7 with Sidak's multiple comparisons test). **(c)** *IFNG* mRNA expression in human Tregs  
8 cultured in Th0 or Th1 condition in the presence (NaCl) or absence (Control) of additional  
9 40 mM NaCl for 96 h (n=19 subjects). \* $P$ <0.05, \*\* $P$ <0.01, \*\*\* $P$ <0.001 (one-way ANOVA  
10 with Tukey's multiple comparisons test). **(d)** *IFNG* mRNA expression in human Tregs  
11 stimulated in the presence (NaCl) or absence (Control) of additional 40 mM NaCl with and  
12 without Wnt/inhibitor PKF115-584 (PKF) or IWR-1 (IWR) for 96 h (n=7-10 subjects).  
13 \* $P$ <0.05 (one-way ANOVA with Tukey's multiple comparisons test). **(e)** Representative flow  
14 cytometric analysis of IFN $\gamma$  and IL-10 production in human Tregs transduced with a  
15 non-targeted shRNA or a *CTNNB1* shRNA and cultured in the normal media (Control) or  
16 media supplemented with additional 40 mM NaCl (NaCl) for 96 h. **(f)** *IFNG* and *IL10* mRNA  
17 expression on Tregs, and **(g)** frequency of IFN $\gamma$  and IL-10 producing Tregs relative to  
18 control/scramble shRNA condition were shown. Tregs were treated as in **(e)** (**f**; n=9  
19 subjects, **g**; n=8 subjects). \* $P$ <0.05, \*\* $P$ <0.01, \*\*\* $P$ <0.001 (one-way ANOVA with Tukey's  
20 multiple comparisons test).

21

## 22 **Figure 6**

### 23 **PTGER2 is a unique factor regulating IFN $\gamma$ and IL-10 in conjunction with $\beta$ -catenin** 24 **under high salt condition**

25 **(a)** Venn diagrams showing the overlapped genes between the genes upregulated in NaCl  
26 treatment (NaCl Up) and downregulated in Th1 condition (Th1 Down) (left), and between  
27 the genes downregulated in NaCl treatment (NaCl Down) and upregulated in Th1 condition  
28 (Th1 Up) (right). **(b)** *PTGER2* mRNA expression in human Tregs (left) and Th17 cells (right).  
29 Tregs were stimulated with anti-CD3 and anti-CD28 in the normal media (Control) or media  
30 supplemented with additional 40 mM NaCl (NaCl) for 96 h (n=14 subjects). Naïve CD4<sup>+</sup> T  
31 cells were cultured in the normal Th17 condition (Control) or Th17 condition supplemented



1 with additional 40 mM NaCl (NaCl) for 72 h (n=6 subjects). \* $P$ <0.05, \*\*\* $P$ <0.001 (two-tailed  
2 Student's  $t$ -test). **(c)** Representative flow cytometric analysis of IFN $\gamma$  and IL-10 production in  
3 human Tregs transduced with a scramble shRNA or a *PTGER2* shRNA and cultured in the  
4 normal media (Control) or media supplemented with additional 40 mM NaCl (NaCl) for 96 h.  
5 **(d)** Relative frequency of IFN $\gamma$  and IL-10 producing Tregs, and **(e)** relative expression level  
6 of ABC in Tregs were shown. Tregs were treated as in **(c)** (**d, e**; n=8 subjects). \* $P$ <0.05,  
7 \*\* $P$ <0.01, \*\*\* $P$ <0.001 (one-way ANOVA with Tukey's multiple comparisons test).

8

## 9 **Figure 7**

### 10 **Stabilized $\beta$ -catenin associated with IFN $\gamma$ and *PTGER2* expression in Tregs from MS** 11 **patients**

12 **(a)** Flow cytometric analysis of Tregs from the mesenteric lymph nodes of wild type mice  
13 fed a normal diet (ND) or a high-salt diet (HSD) for 3 weeks. Quantification of gMFI for  
14  $\beta$ -catenin and p-Foxo1/3a/4 were shown (ND; n=4, HSD; n=4). \* $P$ <0.05 (two-tailed  
15 unpaired Student's  $t$ -test). **(b)** Flow cytometric analysis of ABC level in *ex vivo* Tregs of  
16 healthy controls and MS patients (HC; n=14 subjects, MS; n=11 subjects). Correlation plots  
17 **(c)**; between the percentage of IFN $\gamma$ -producing Tregs and gMFI of Active  $\beta$ -catenin (ABC),  
18 **(d)**; between *IFNG* and *PTGER2* mRNA expression, **(e)**; between ABC level and *PTGER2*  
19 mRNA expression level in healthy subjects and MS patients. Linear regression is shown  
20 with 95% confidence interval (dotted lines). Correlation statistics by two-tailed Spearman  
21 rank correlation test.

22

1 **Supplementary Figure legends**

2

3 **Supplementary Figure 1**

4 **Memory Tregs are the main source of effector cytokines IFN $\gamma$  and IL-10**

5 **(a)** Sorting strategy for memory and naive Tregs from circulating human CD4<sup>+</sup> T cells. **(b)**  
6 mRNA expression of *IFNG* and *IL10* gene on memory and naive Tregs (memory Tregs;  
7 n=35 subjects, naïve Tregs; n=16 subjects). \**P*<0.05, \*\**P*<0.01 (two-tailed unpaired  
8 Student's *t*-test).

9

10 **Supplementary Figure 2**

11 **GSEA of Wnt signaling pathway on Treg subsets**

12 **(a)** GSEA enrichment plots of KEGG Wnt signaling pathway between IL10SP vs. DN and  
13 DP vs. DN. **(b)** GSEA enrichment plots of four different Wnt signaling pathway gene sets  
14 between IFN $\gamma$ SP vs. DN.

15

16 **Supplementary Figure 3**

17  **$\beta$ -catenin signaling is activated in IFN $\gamma$  producing human Treg subset**

18 **(a)** *AXIN2* and *TCF7* mRNA expression in IFN $\gamma$ <sup>+</sup> and IFN $\gamma$ <sup>-</sup> human Treg populations  
19 assessed by DNA microarray (n=8 subjects)<sup>32</sup>. \**P*<0.05 (two-tailed paired Student's *t*-test).

20 **(b)** *CTNNB1* gene expression on Tregs transduced with a non-targeted shRNA or a  
21 *CTNNB1* shRNA and cultured for 5 days (n=10 subjects). \*\*\**P*<0.001 (two-tailed unpaired  
22 Student's *t*-test). **(c)** Flow cytometric analysis of TCF1 expression on *ex vivo* Treg

23 subpopulations relative to DN (n=8 subjects). \**P*<0.05, \*\**P*<0.01 (one-way ANOVA with  
24 Tukey's multiple comparisons test). **(d)** Frequency of IFN $\gamma$  and IL-10 positive cell number.

25 Tregs were stimulated with anti-CD3 and anti-CD28 in the presence of SGK1 inhibitor  
26 GSK650394 (SGK1-i), IL-12 (Th1), or IL-12 and GSK650394 (Th1+ SGK1-i) (n=6 subjects)  
27 \*\*\**P*<0.001 (one-way ANOVA with Tukey's multiple comparisons test).

28

29 **Supplementary Figure 4**

30 **Treg specific activation of  $\beta$ -catenin induces IFN $\gamma$  secreting dysfunctional phenotype**  
31 **with *Scurfy*-like autoimmunity**

1 **(a)** Schematic of the wild-type and targeted *CTNNB1* allele. Exon3 of *CTNNB1* gene  
2 encodes a phosphorylation site necessary for  $\beta$ -catenin degradation. Therefore, Exon3  
3 deleted  $\beta$ -catenin can escaped degradation and works as a constitutively active form. **(b)**  
4 Flow cytometric analysis of  $\beta$ -catenin on peripheral lymph node Foxp3<sup>+</sup> Tregs (Treg) and  
5 Foxp3<sup>-</sup> CD4<sup>+</sup> T cells (CD4T) from *Foxp3<sup>Cre</sup>* and *Foxp3<sup>Cre</sup>/ $\beta$ -ctn <sup>$\Delta$ Ex3</sup>* mice. **(c)** Flow cytometric  
6 analysis of  $\beta$ -catenin and Foxp3 in peripheral lymph nodes, spleen, and thymus CD4<sup>+</sup> T  
7 cells from *Foxp3<sup>Cre</sup>* and *Foxp3<sup>Cre</sup>/ $\beta$ -ctn <sup>$\Delta$ Ex3</sup>* mice. **(d)** The percentage of Foxp3<sup>+</sup> Tregs within  
8 CD4<sup>+</sup> T cells and the cell numbers of Foxp3<sup>+</sup> Tregs in spleen (top) and thymus (bottom)  
9 from *Foxp3<sup>Cre</sup>* and *Foxp3<sup>Cre</sup>/ $\beta$ -ctn <sup>$\Delta$ Ex3</sup>* mice at 3 weeks (3wks) and 5 week old (5wks) of age.  
10 **(e)** Flow cytometric analysis of CD4<sup>+</sup> and CD8<sup>+</sup> T cells in peripheral lymph nodes and  
11 spleen from *Foxp3<sup>Cre</sup>* and *Foxp3<sup>Cre</sup>/ $\beta$ -ctn <sup>$\Delta$ Ex3</sup>* mice at the age of 3 weeks. Cell count and  
12 percentages of CD4<sup>+</sup> and CD8<sup>+</sup> T cells among CD3<sup>+</sup> T cells from the spleen were shown at  
13 the bottom. \*\* $P$ <0.01 \*\*\* $P$ <0.001, \*\*\*\* $P$ <0.0001 (two-way ANOVA with Sidak's multiple  
14 comparisons test). **(f)** Expression for classical helper cytokines and transcription factors in  
15 both Tregs and T effector cells (CD4<sup>+</sup> CD25<sup>neg</sup>) assessed by qPCR (n=4 mice). \* $P$ <0.05,  
16 \*\* $P$ <0.01 (two-tailed Student's  $t$ -test). **(g)** Flow cytometric analysis of Foxp3 and Helios  
17 expression on CD4<sup>+</sup> T cells in peripheral lymph nodes and spleen from *Foxp3<sup>Cre</sup>* and  
18 *Foxp3<sup>Cre</sup>/ $\beta$ -ctn <sup>$\Delta$ Ex3</sup>* mice at the age of 3 weeks. Percentages of Foxp3<sup>+</sup> and/or Helios<sup>+</sup> CD4<sup>+</sup>  
19 T cells isolated from lymph nodes are shown at the bottom. (n=5-6 mice) \*\*\* $P$ <0.001  
20 (two-way ANOVA with Sidak's multiple comparisons test). **(h)** GSEA enrichment plot  
21 between *Foxp3<sup>Cre</sup>* and *Foxp3<sup>Cre</sup>/ $\beta$ -ctn <sup>$\Delta$ Ex3</sup>* Tregs using the gene set that is positively  
22 regulated by Foxo1 (left) and negatively regulated by Foxo1 (right) identified from the  
23 comparison between Wild type vs. Foxo1 KO Tregs (GSE40655). Normalized enrichment  
24 score (NES) and false discovery rate (FDR) are indicated.

25

## 26 **Supplementary Figure 5**

### 27 **High salt activates the $\beta$ -catenin/SGK1/Foxo axis in IFN $\gamma$ -producing human Tregs**

28 **(a)** Flow cytometric analysis of phospho-SGK1 (left) and phospho-Foxo1 (right) level in  
29 human Treg subsets. Tregs were stimulated with anti-CD3 and anti-CD28 for 96 h followed  
30 by 4 h PMA/iomomycin stimulation, and the expression of p-SGK1 and p-Foxo1 were  
31 determined by intracellular staining in each subset. (n=12 subjects; pSGK1, n=10 subjects;

1 p-Foxo1) **(b)** Representative immunofluorescence images of human Tregs with PLA signal  
2 for  $\beta$ -catenin-Foxo1 interaction (red) and IFN $\gamma$  staining (green). Nuclei were stained with  
3 DAPI (blue). PLA signal (arrowheads) was observed in an IFN $\gamma$  positive cell (arrow). **(c)**  
4 Flow cytometric analysis of ABC, phospho-Foxo1 (Ser256), and phospho-SGK1 (Thr256)  
5 expression in human IL-10 producing Tregs. Tregs were stimulated with anti-CD3 and  
6 anti-CD28 in the presence (NaCl) or absence (Control) of additional 40 mM NaCl for 96 h  
7 followed by PMA/ionomycin stimulation for 4 h (n=10-15 subjects). \* $P$ <0.05 (two-tailed  
8 unpaired Student's  $t$ -test). **(d)** Flow cytometric analysis of TCF1 expression in human IFN $\gamma$   
9 producing Tregs. Tregs were cultured as in **(c)** (n=3 subjects). \* $P$ <0.05 (two-tailed unpaired  
10 Student's  $t$ -test). **(e)** Relative frequency of IFN $\gamma$  and IL-10 positive cell number (fold of  
11 control condition) in human Tregs cultured as in Fig. 5c (n=11 subjects). \* $P$ <0.05, \*\* $P$ <0.01  
12 (one-way ANOVA with Tukey's multiple comparisons test). **(f)** Relative frequency of IFN $\gamma$   
13 and IL-10 positive cell number (fold of control condition) in human Tregs cultured as in Fig.  
14 5d (n=9 subjects). \* $P$ <0.05, \*\* $P$ <0.01 (one-way ANOVA with Tukey's multiple comparisons  
15 test). **(g)** Flow cytometric analysis of p-SGK1 expression in human IFN $\gamma$  producing Tregs.  
16 Tregs were cultured as in Fig. 5d (n=6 subjects). \* $P$ <0.05, \*\* $P$ <0.01 (one-way ANOVA with  
17 Tukey's multiple comparisons test). **(h)** Frequency of IFN $\gamma$  and IL-10 positive cell number in  
18 human Tregs stimulated in the presence (NaCl) or absence (Control) of additional 40 mM  
19 NaCl with and without Wnt/inhibitor GSK650394 (SGK1-i) for 96 h (n=11 subjects). \* $P$ <0.05,  
20 \*\* $P$ <0.01 (one-way ANOVA with Tukey's multiple comparisons test). **(i)** Flow cytometric  
21 analysis of p-Foxo1 expression in human IFN $\gamma$  producing Tregs. Tregs were cultured as in  
22 **(h)** (n=8 subjects). \* $P$ <0.05 (one-way ANOVA with Tukey's multiple comparisons test).

23

## 24 **Supplementary Figure 6**

25 **The  $\beta$ -catenin/SGK1/Foxo axis is also activated in Teff and human Jurkat T cells**  
26 **under high salt conditions.**

27 **(a)** Flow cytometric analysis of ABC expression in human T effector cells (Teffs) and human  
28 Jurkat T cells. Human Teff were stimulated as well as Tregs for 96 h (n=8 subjects). Human  
29 Jurkat T cells were cultured without TCR stimulation for 120 h (n=12). Both were cultured in  
30 the presence (NaCl) or absence (Control) of additional 40 mM NaCl. \* $P$ <0.05, \*\*\* $P$ <0.001  
31 (two-tailed unpaired Student's  $t$ -test). **(b)** Relative frequency of IFN $\gamma$  and IL-10 positive cell

1 number (fold of control condition) in human Tregs cultured as in **(a)** (n=8 subjects). \*\* $P < 0.01$ ,  
2 \*\*\* $P < 0.001$  (two-tailed unpaired Student's *t*-test). **(c, d)** Flow cytometric analysis of SGK1  
3 phosphorylation at Thr256 **(c)** and Foxo1 phosphorylation at Ser256 **(d)** in human Jurkat T  
4 cells. Human Jurkat T cells were transduced with scramble gRNA (CRISPR/Scramble) or  
5 *CTNNB1* targeted gRNA (CRISPR/*CTNNB1*) with Cas9. Both cell lines were cultured in the  
6 presence (NaCl) or absence (Control) of additional 40 mM NaCl without TCR stimulation for  
7 120 h (n=4). \*\* $P < 0.01$  (one-way ANOVA with Tukey's multiple comparisons test).

8

### 9 **Supplementary Figure 7**

#### 10 **High salt induced $\beta$ -catenin activation via AKT is independent of Wnt ligands**

11 **(a)** Relative frequency of IFN $\gamma$  and IL-10 positive cell number (fold of control condition) in  
12 human Tregs. Tregs were stimulated with anti-CD3 and anti-CD28 in the presence of  
13 Fzd8-FC (Fzd), additional 40 mM NaCl (NaCl), or Fzd8-FC and NaCl (NaCl + Fzd8) (n=7  
14 subjects). \* $P < 0.05$ , \*\* $P < 0.01$  (one-way ANOVA with Tukey's multiple comparisons test). **(b)**  
15 Relative expression level of ABC in human Tregs cultured as in **(a)**. (n=7 subjects) \* $P < 0.05$ ,  
16 \*\* $P < 0.01$  (one-way ANOVA with Tukey's multiple comparisons test). **(c)** GSEA enrichment  
17 plots of PI3K/AKT pathway gene sets between IFN $\gamma$ SP vs. IL10SP. Normalized enrichment  
18 score (NES) and false discovery rate (FDR) are indicated at the bottom of each plot. **(d)**  
19 Relative expression level of p-AKT on Treg subsets. Tregs were stimulated with anti-CD3  
20 and anti-CD28 for 4 days, followed by 4 h PMA/iomomycin stimulation and intracellular  
21 cytokine staining for IFN $\gamma$  and IL-10 (n=5 subjects). \* $P < 0.05$ , \*\* $P < 0.01$  (one-way ANOVA  
22 with Tukey's multiple comparisons test). **(e)** Flow cytometric analysis of  $\beta$ -catenin  
23 phosphorylation at s522 in human Jurkat T cells. Human Jurkat T cells were stimulated in  
24 the presence of AKT inhibitor MK2206 (AKT-i), additional 40 mM NaCl (NaCl), or MK2206  
25 and NaCl (NaCl + AKT-i) (n=4). **(f)** Flow cytometric analysis of GSK3 $\beta$  phosphorylation at  
26 s9 and AKT phosphorylation at s473 in human Jurkat T cells. Human Jurkat T cells were  
27 prepared as in Supplementary Fig. 6c. (n=4). \* $P < 0.05$ , \*\* $P < 0.01$  (one-way ANOVA with  
28 Tukey's multiple comparisons test).

29

### 30 **Supplementary Figure 8**

#### 31 **PTGER2- $\beta$ -catenin loop is activated by high salt stimulation**

1 **(a)** *PTGER2* expression assessed by RNA-seq on *ex vivo* Treg subpopulations (n=8  
2 subjects). **(b)** Flow cytometric analysis of *PTGER2* in human Jurkat T cells. Human Jurkat T  
3 cells were prepared as in Supplementary Fig. 6c. (n=4). \*\* $P < 0.01$ , \*\*\* $P < 0.001$  (one-way  
4 ANOVA with Tukey's multiple comparisons test). **(c)** Flow cytometric analysis of ABC in  
5 human Jurkat T cells. Human Jurkat T cells were transduced with a scramble shRNA or a  
6 *PTGER2* shRNA and cultured in normal media (Control) or media supplemented with  
7 additional 40 mM NaCl (NaCl) for 120 h. (n=4) \* $P < 0.05$ , \*\* $P < 0.01$  (one-way ANOVA with  
8 Tukey's multiple comparisons test). **(d)** Representative flow cytometric analysis of IFN $\gamma$  and  
9 IL-10 production in human Tregs cultured in the normal media (Control) or media  
10 supplemented with additional 40 mM NaCl (NaCl) with anti CD3 (2 $\mu$ g/ml) and different  
11 concentration of anti CD28 (1, 2, 5  $\mu$ g/ml) for 96 h. Relative frequency of IFN $\gamma$  and IL-10  
12 producing Tregs are shown at the bottom (n=4 subjects). \* $P < 0.05$ , \*\* $P < 0.01$  (two-way  
13 ANOVA with Sidak's multiple comparisons test).

14

#### 15 **Supplementary Figure 9**

#### 16 **Schematic model of the role of *PTGER2* and the AKT/ $\beta$ -catenin/SGK1/Foxo axis for** 17 **the production of IFN $\gamma$ and IL-10 in Tregs**

18 AKT/ $\beta$ -catenin signaling balances IFN $\gamma$ /IL-10 production in Tregs. Under high salt  
19 conditions, *PTGER2* was increased and established the positive feed forward loop with  
20  $\beta$ -catenin, resulted in amplified activation of the  $\beta$ -catenin/SGK1/Foxo axis in  
21 IFN $\gamma$ -producing Tregs.

22

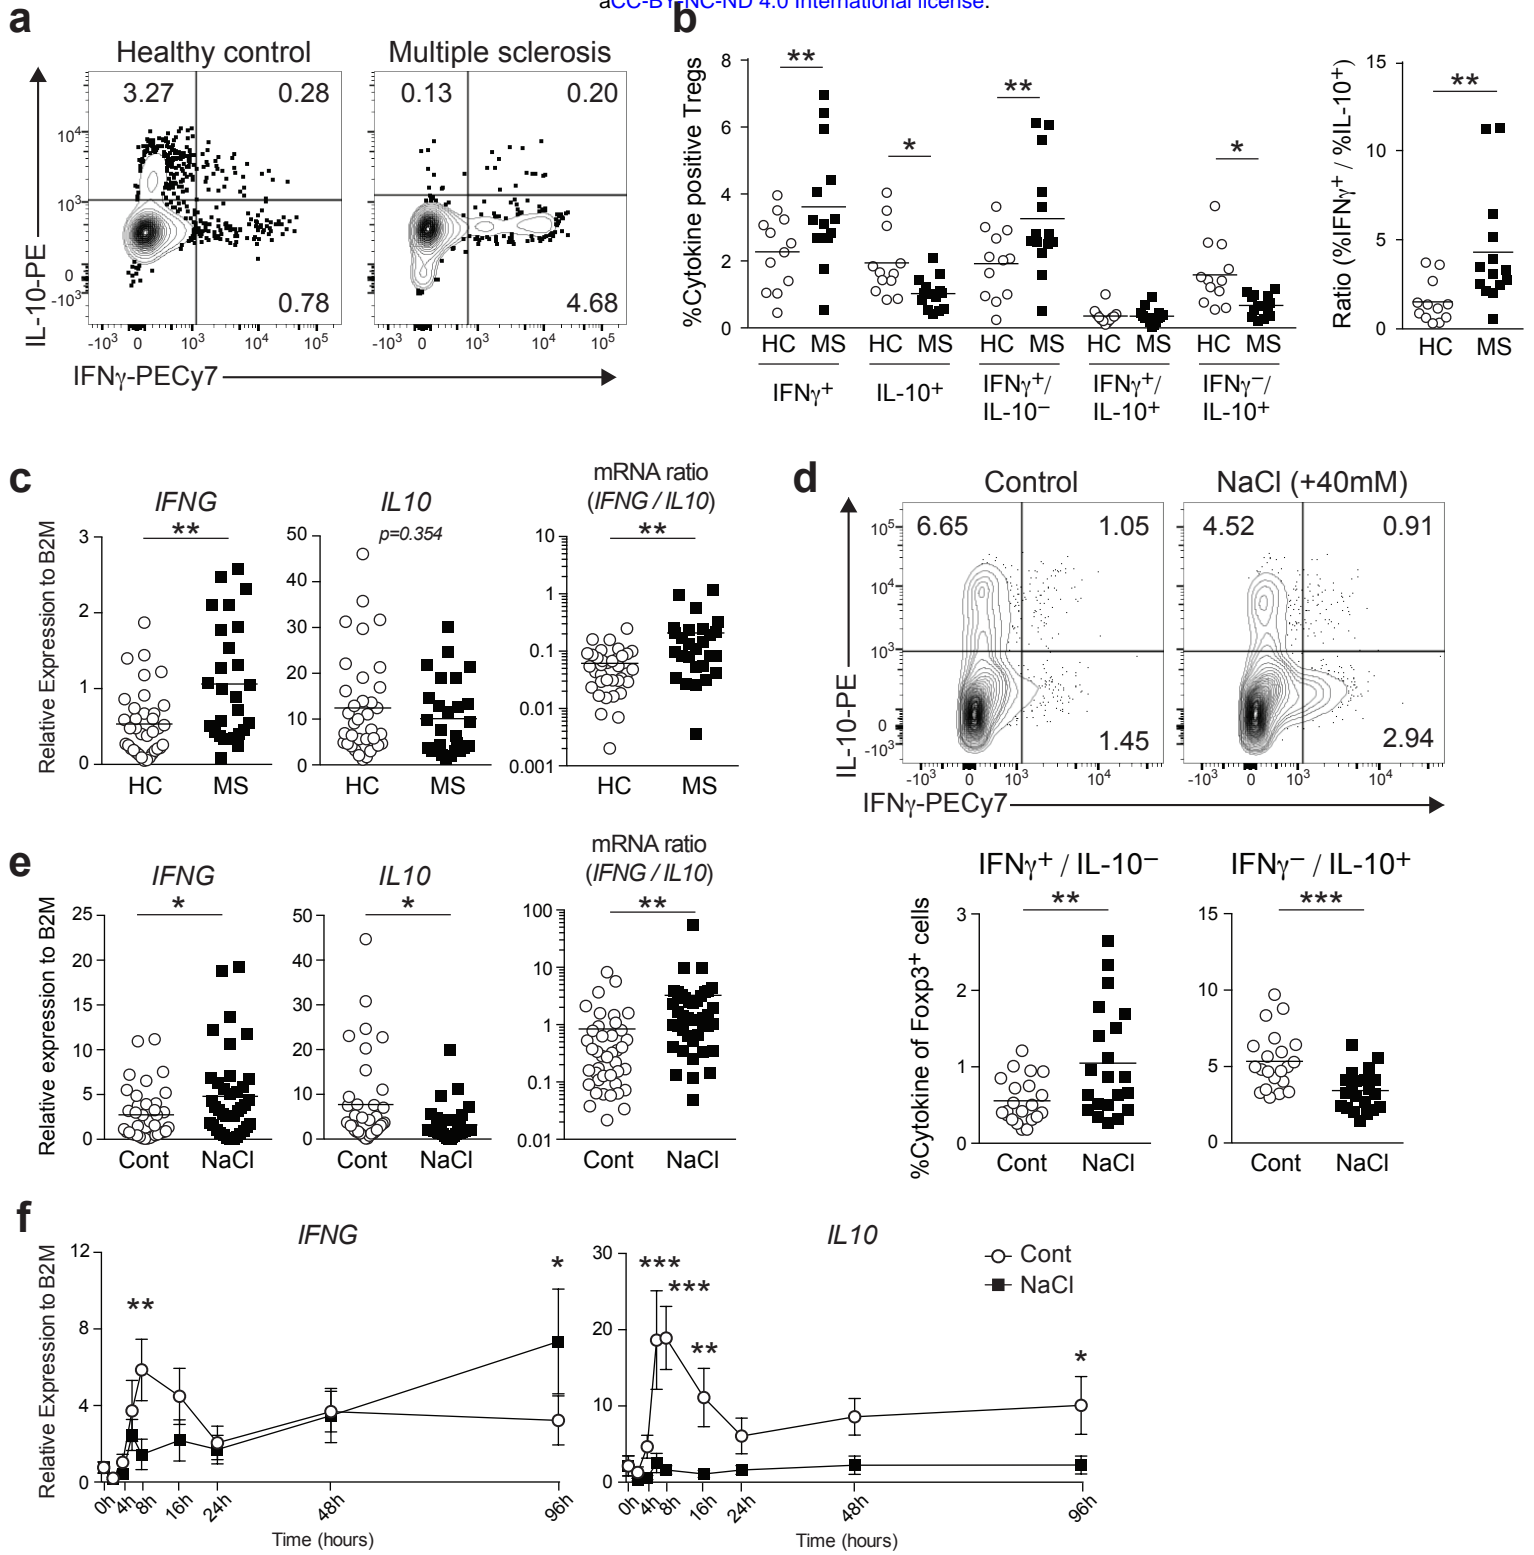



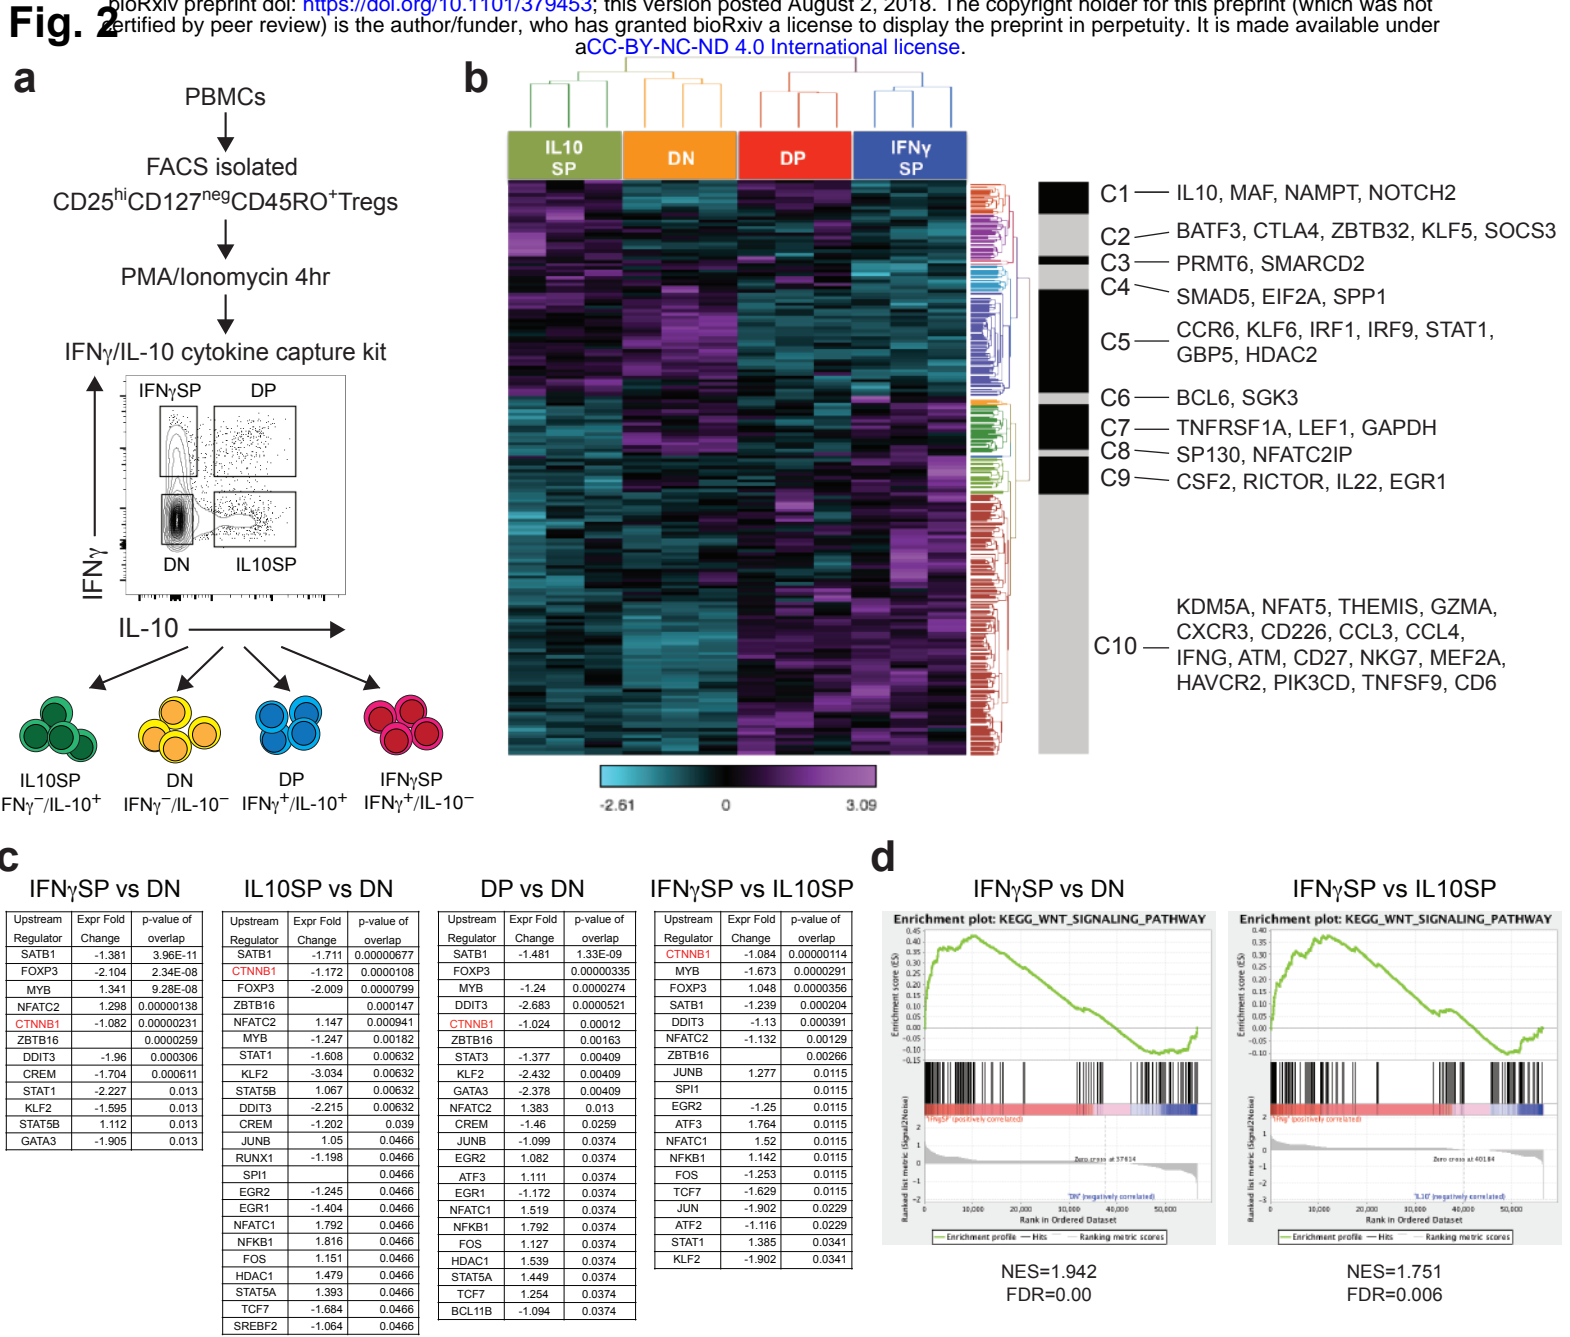



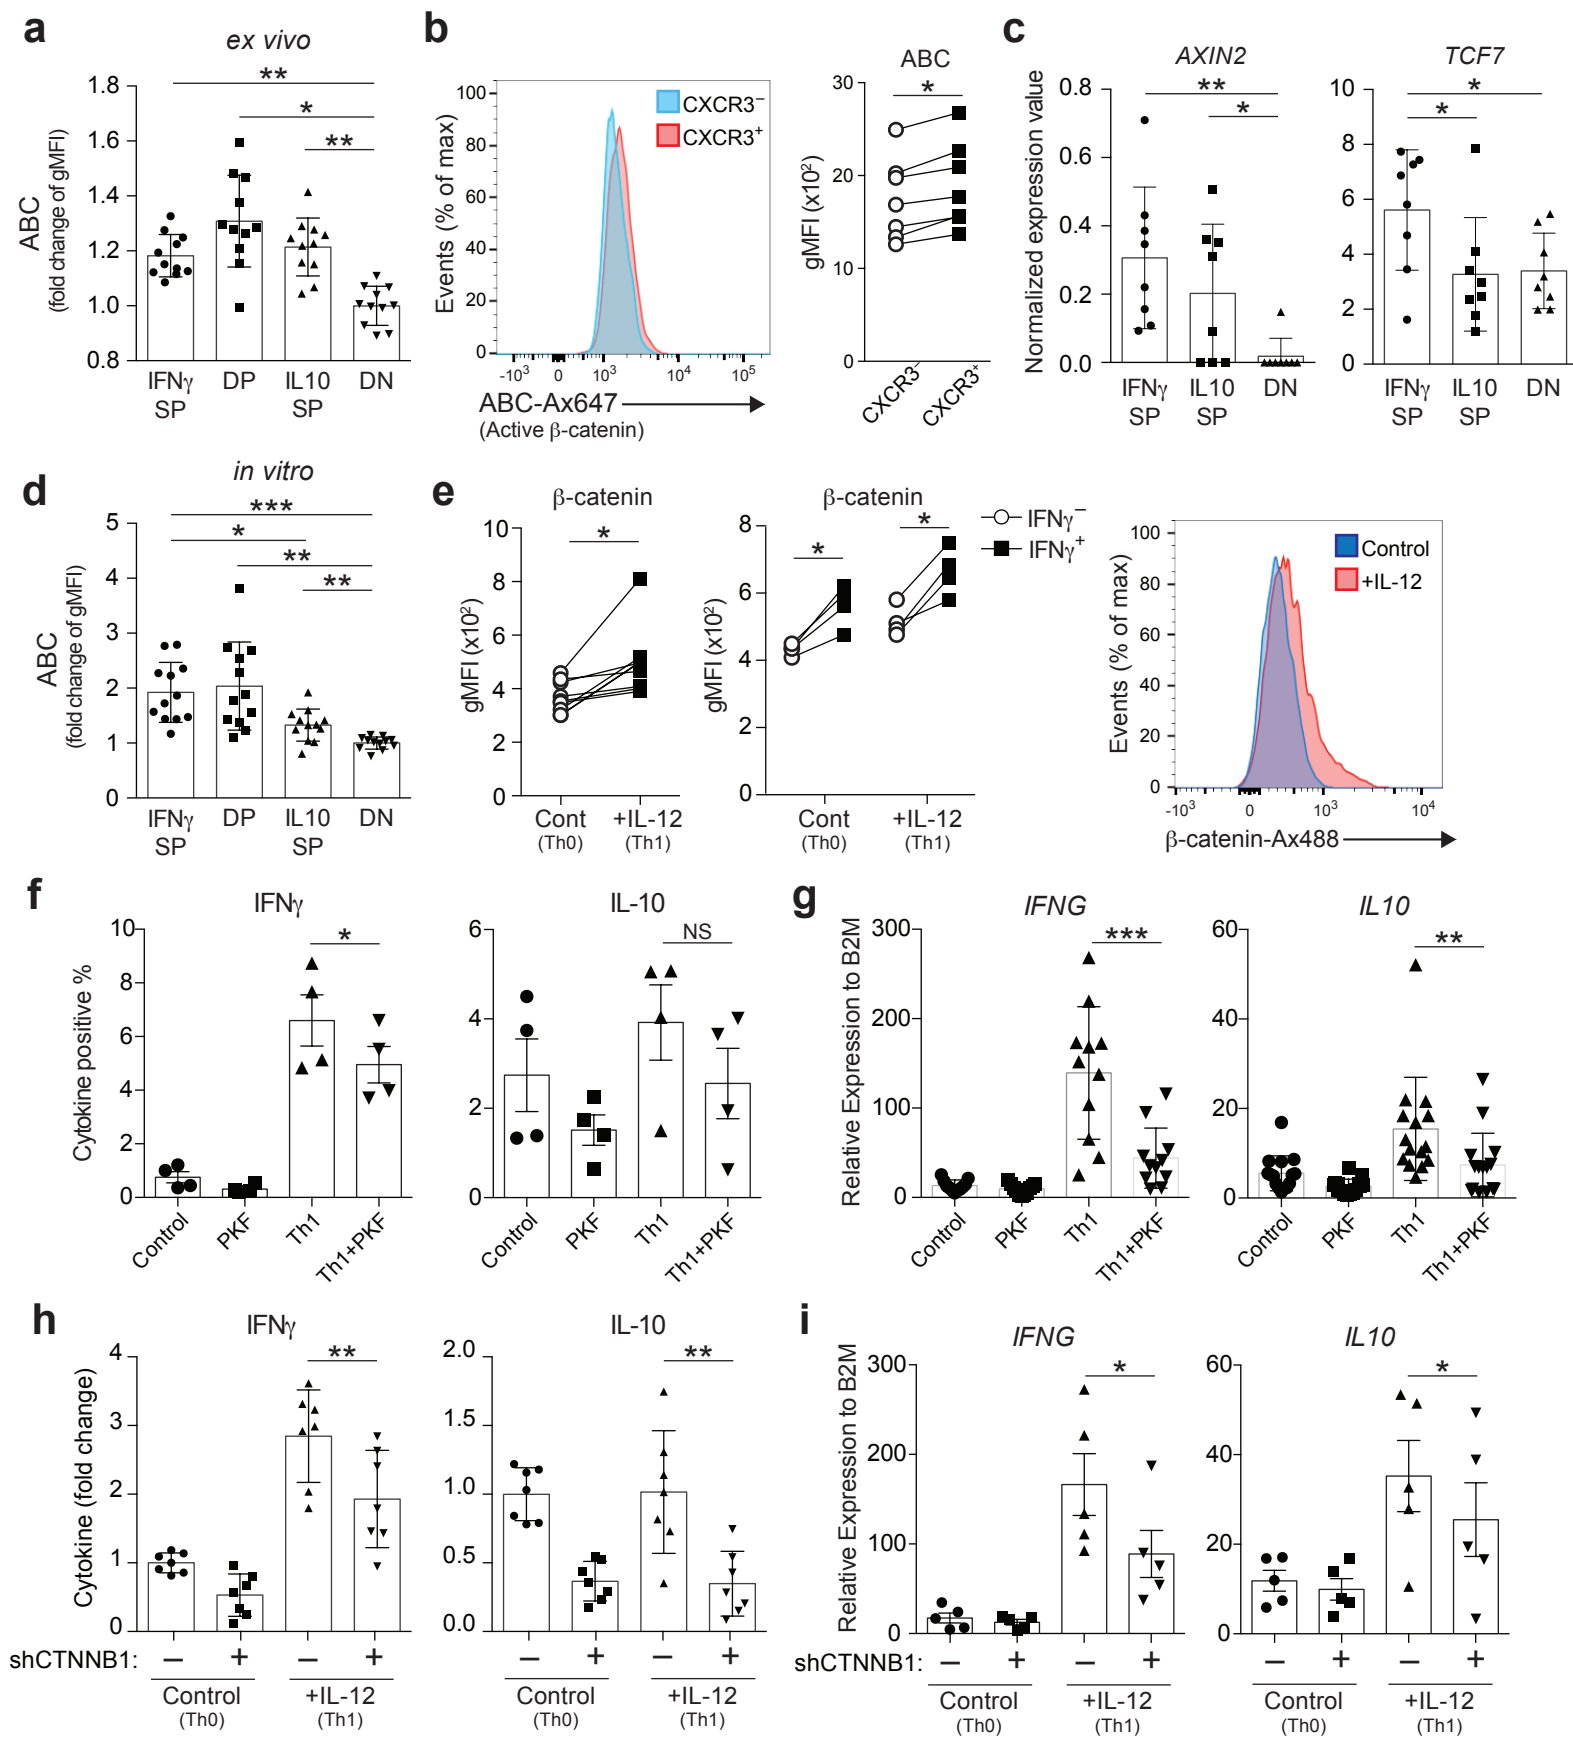

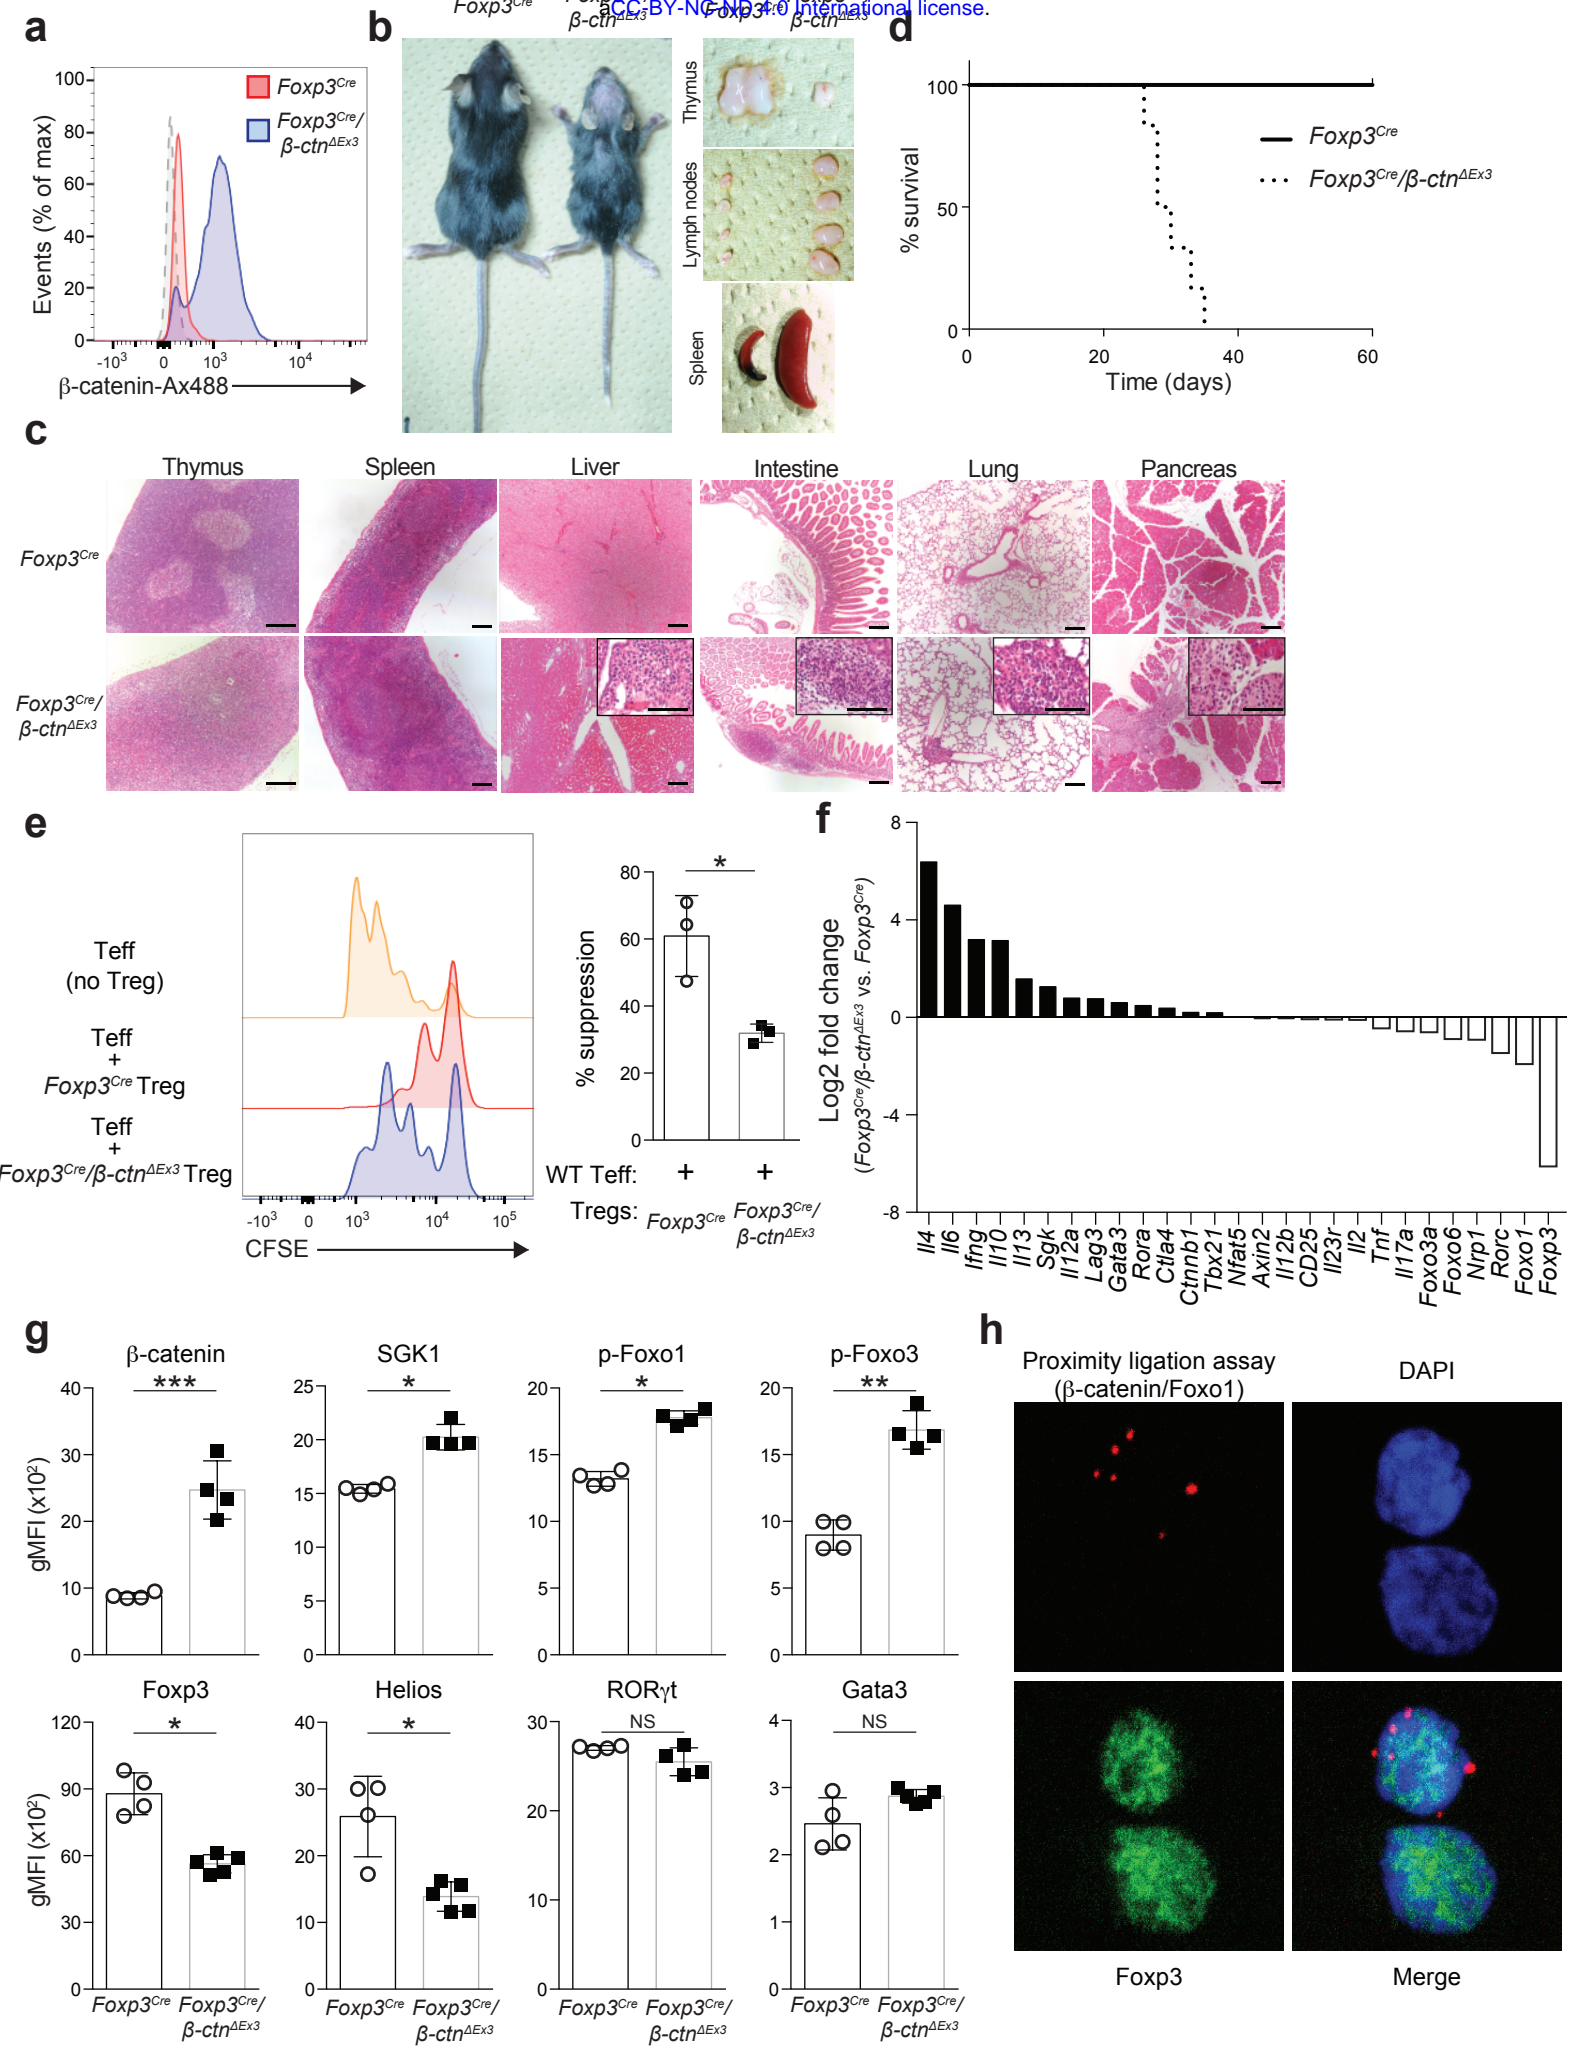

# Fig. 5

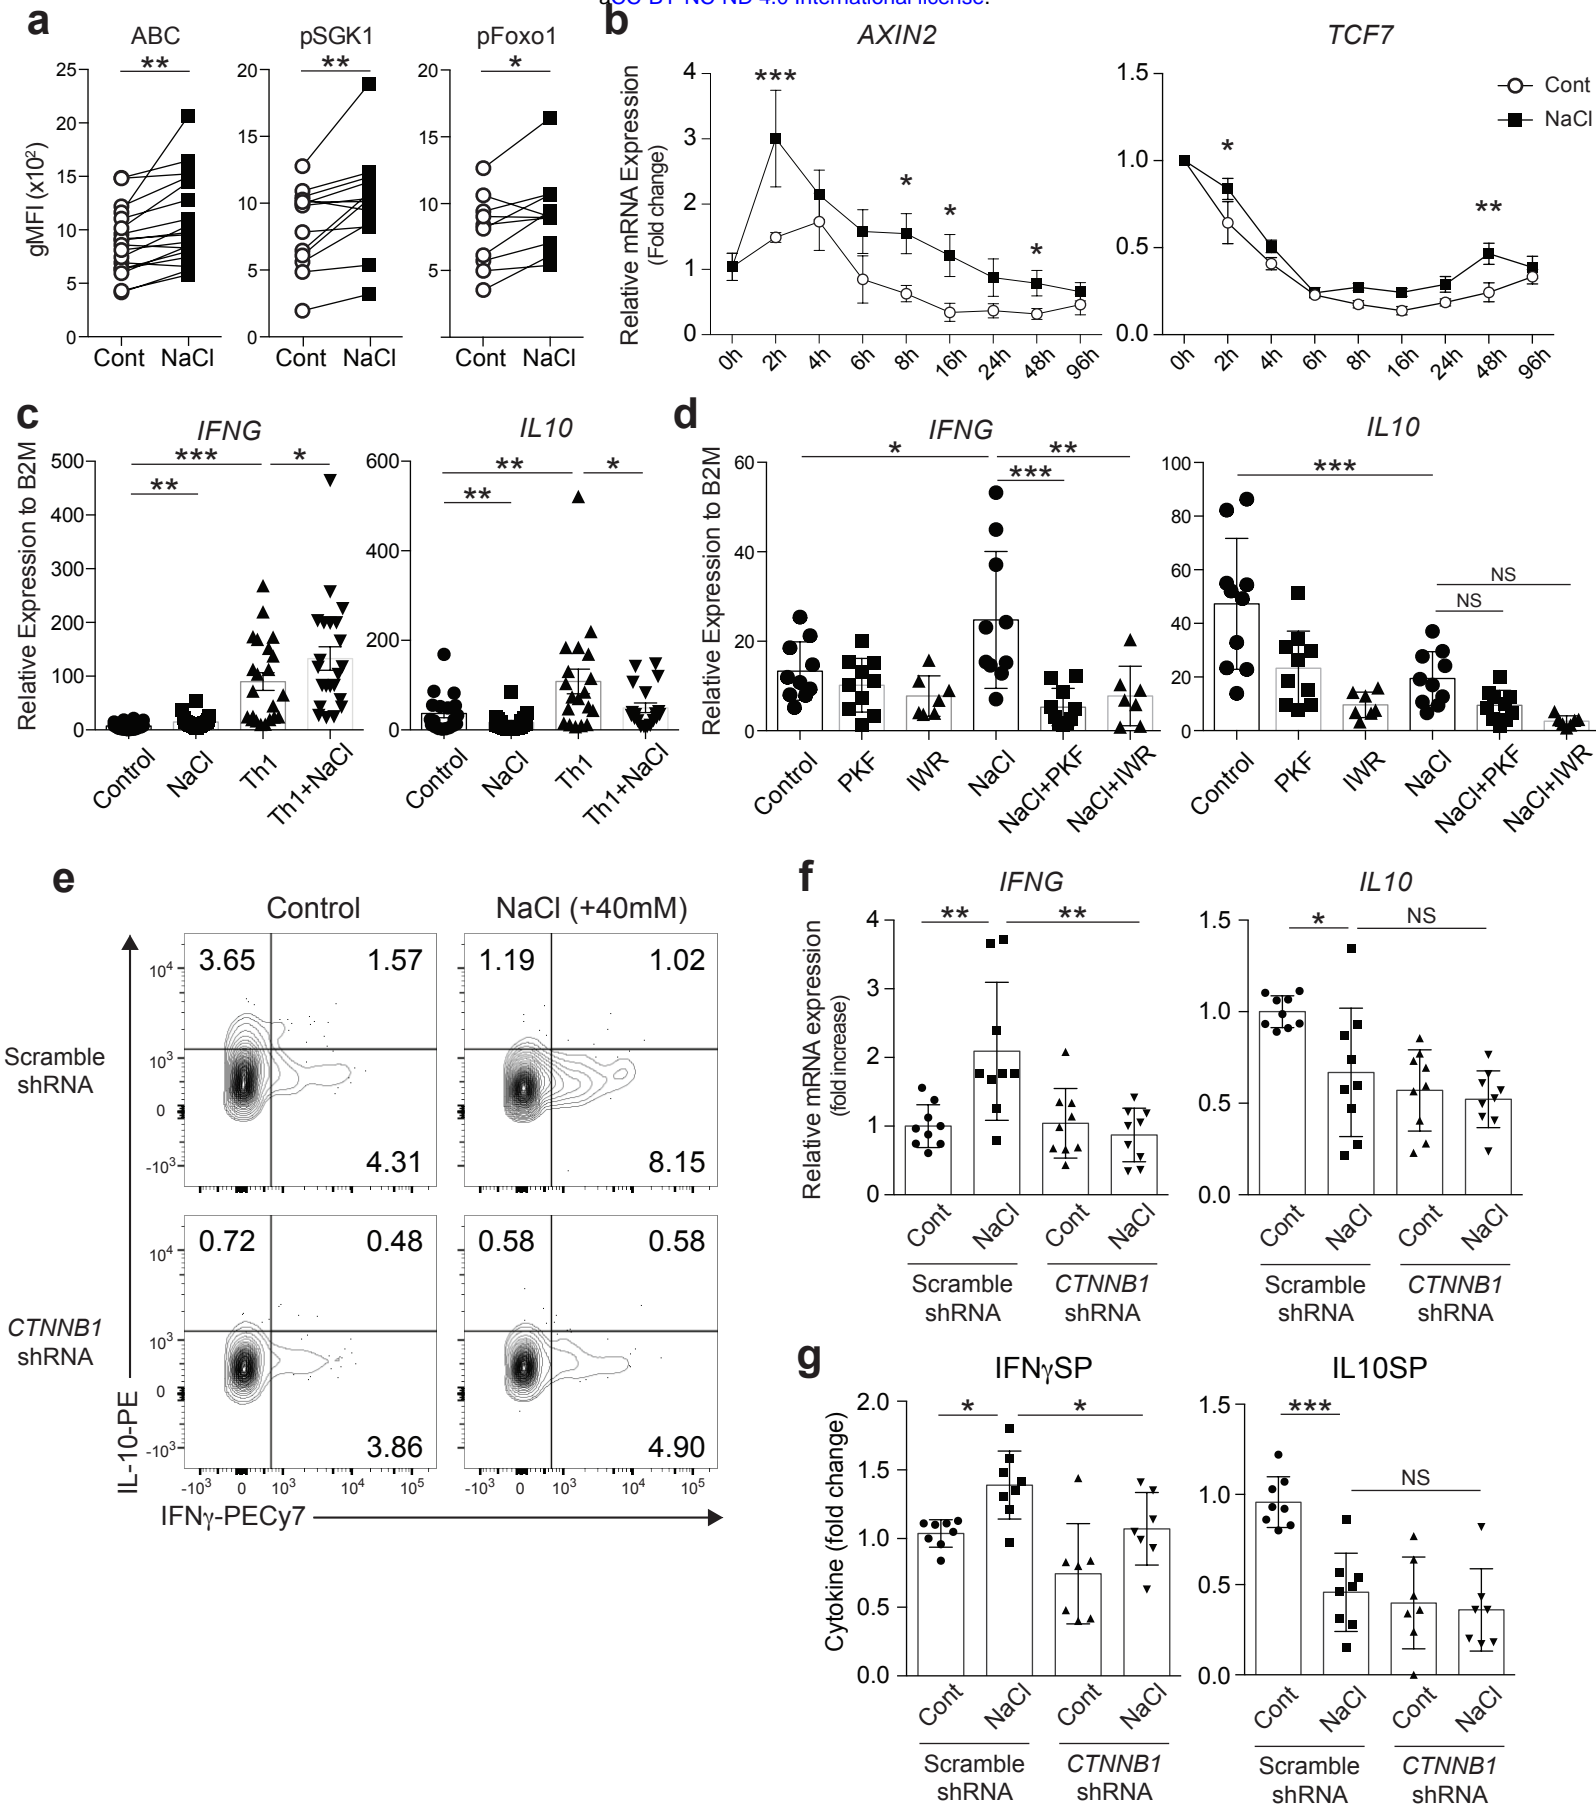

# Fig 6

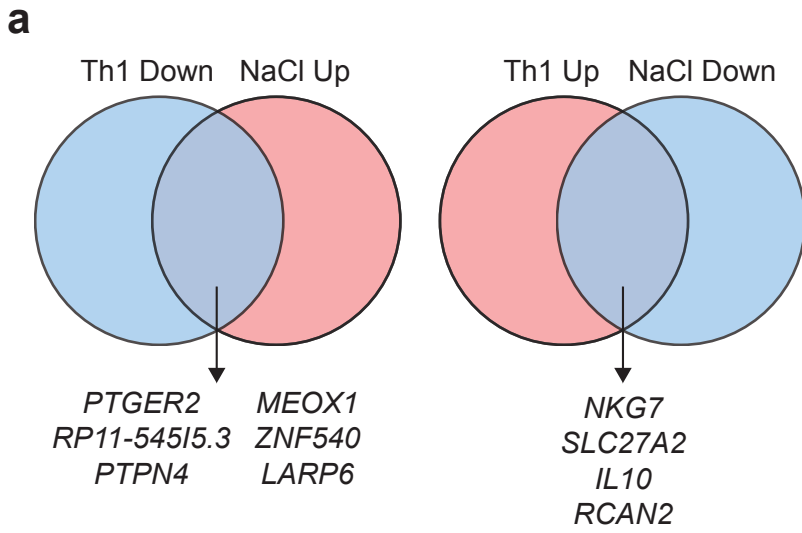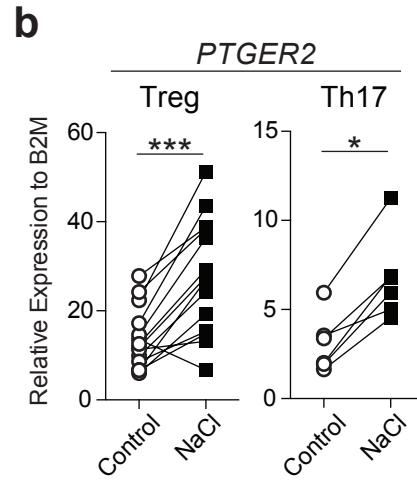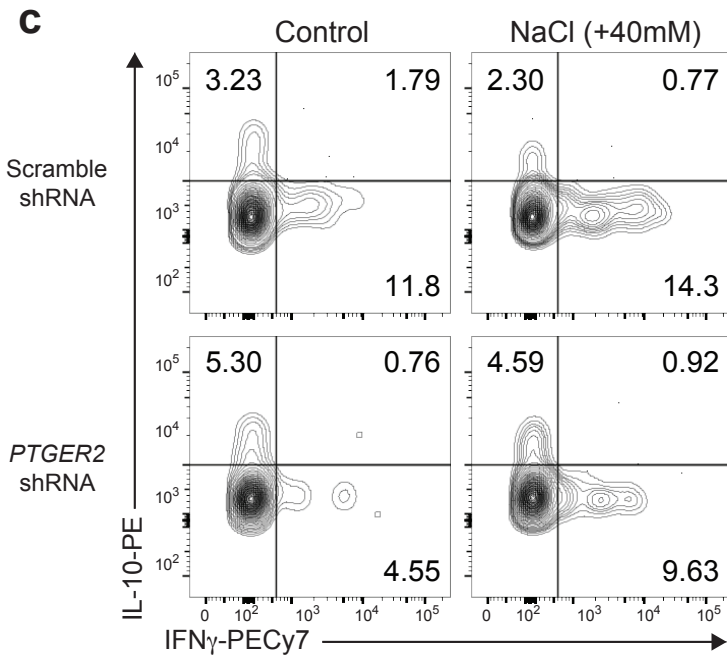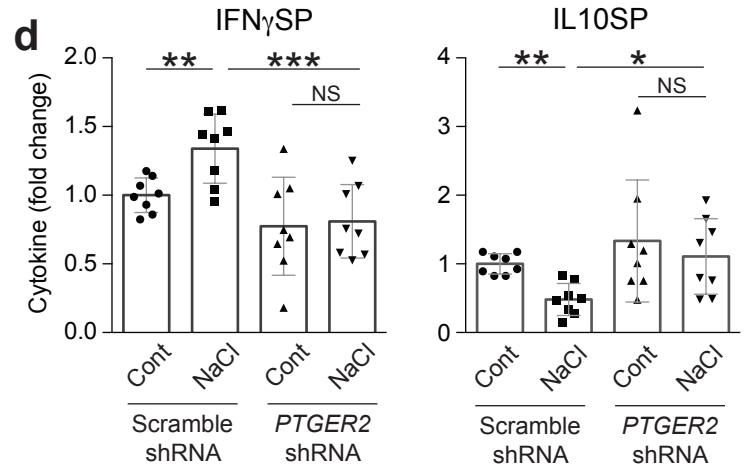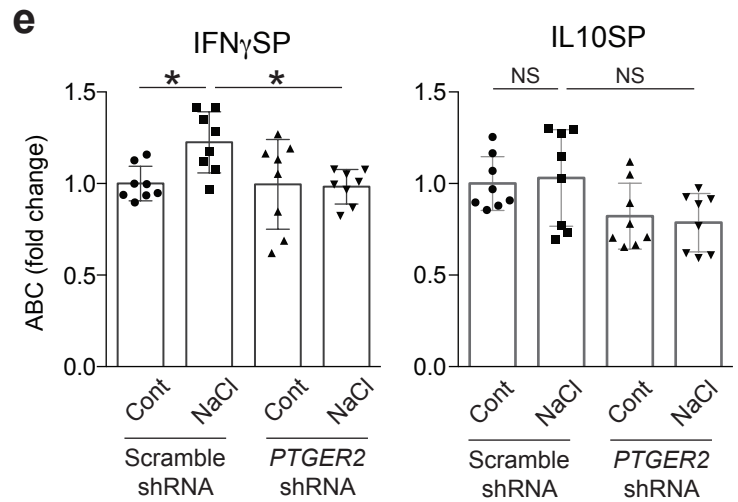

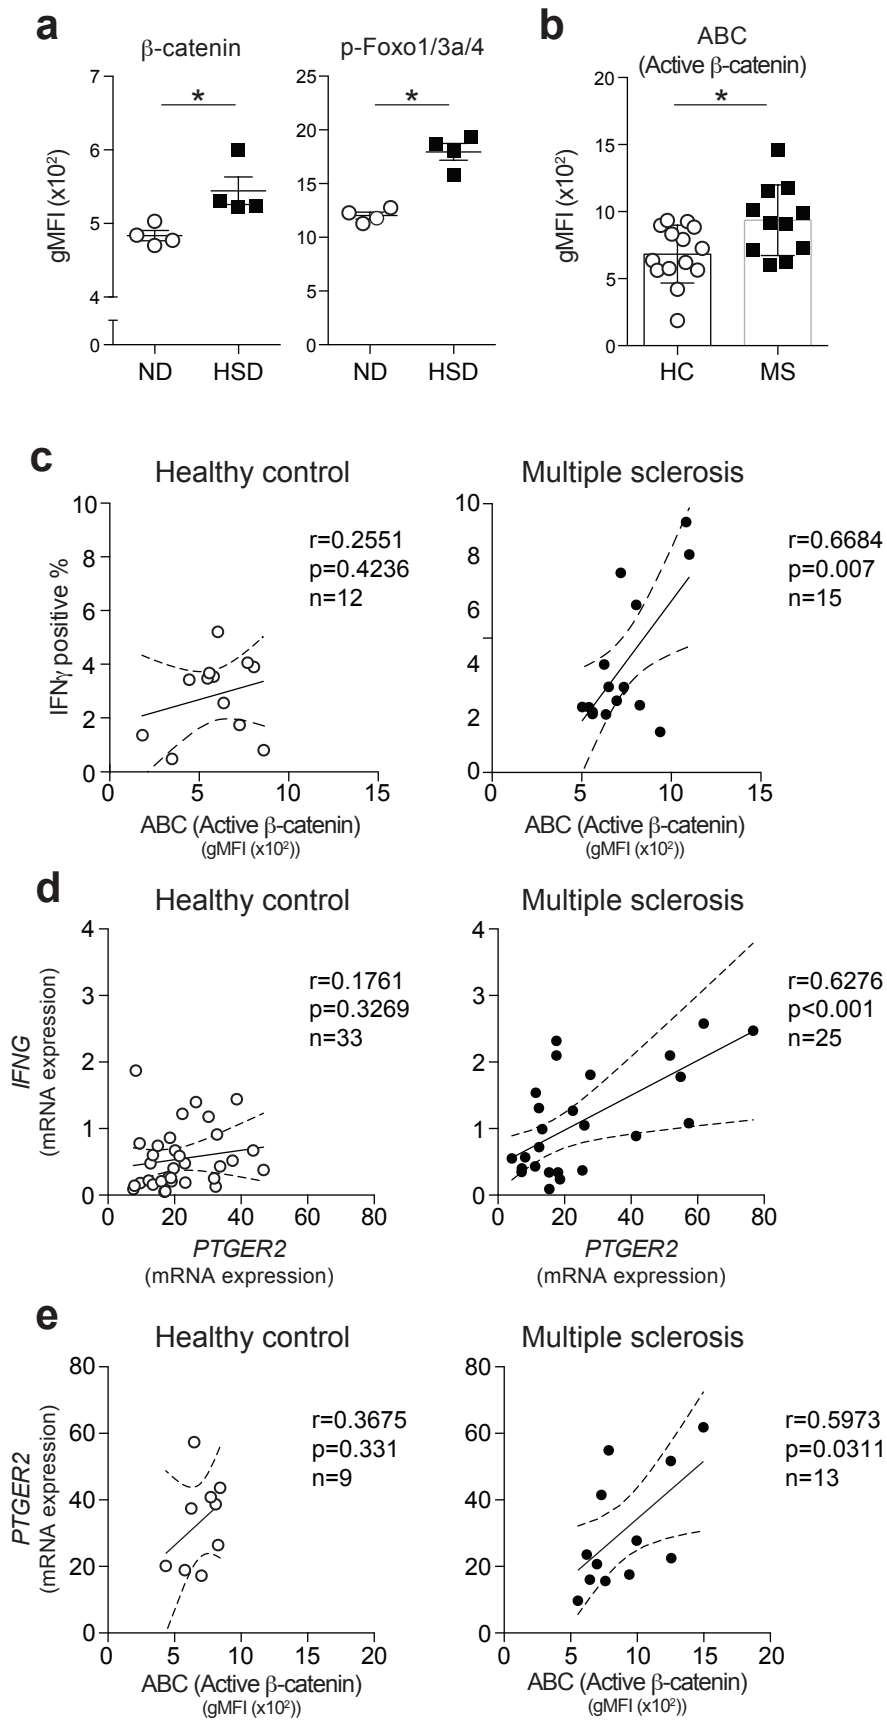

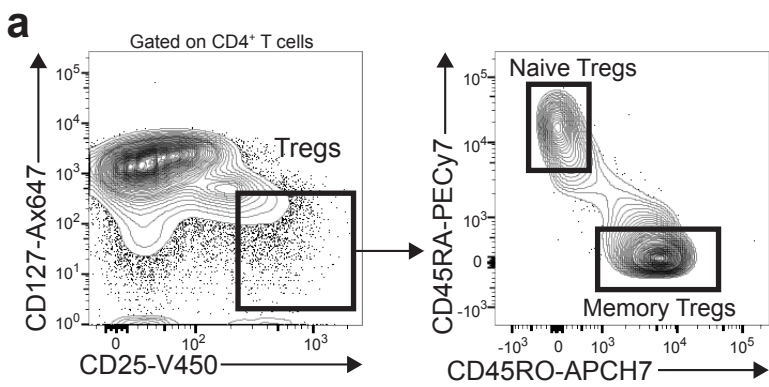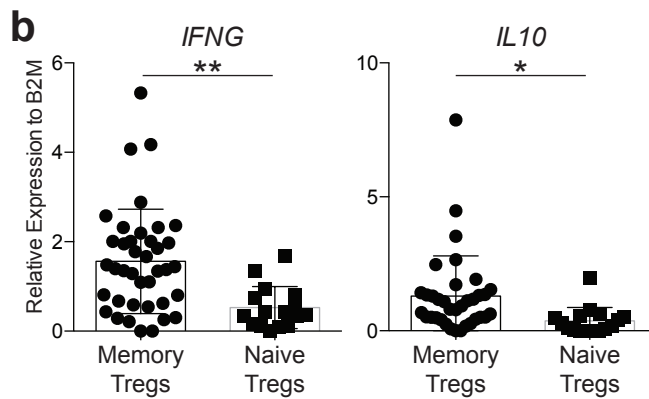

a

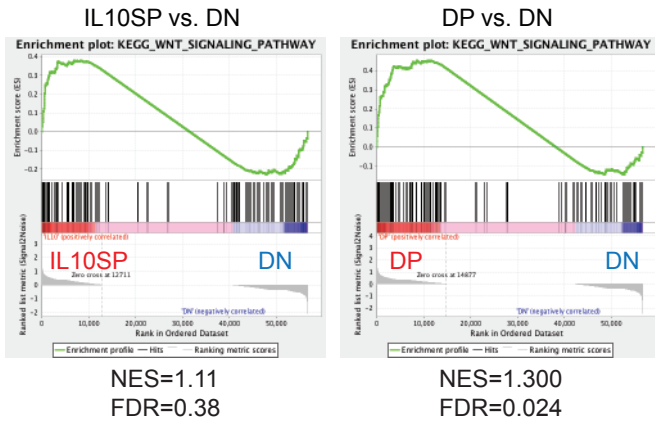

b

IFN $\gamma$ SP vs. DN

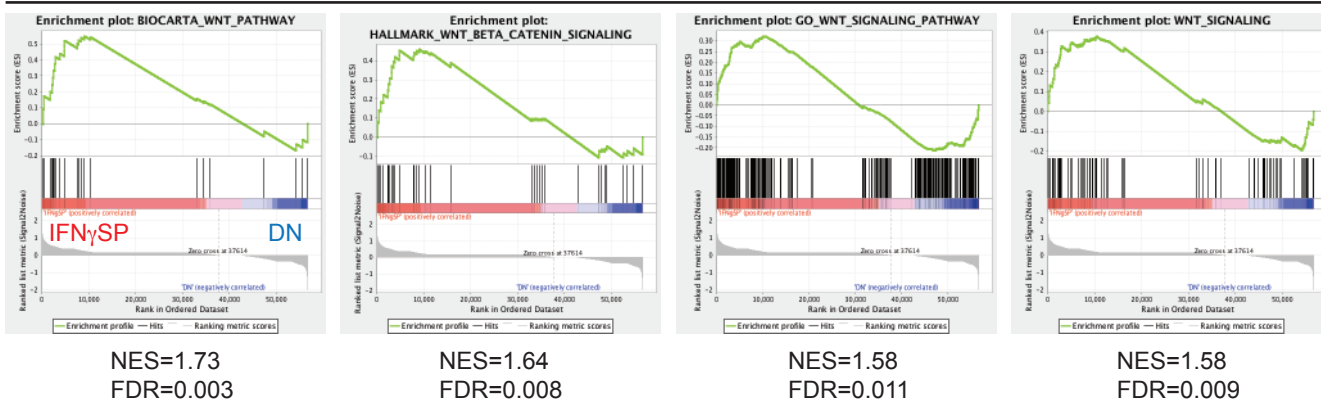



# Supplementary Fig 3

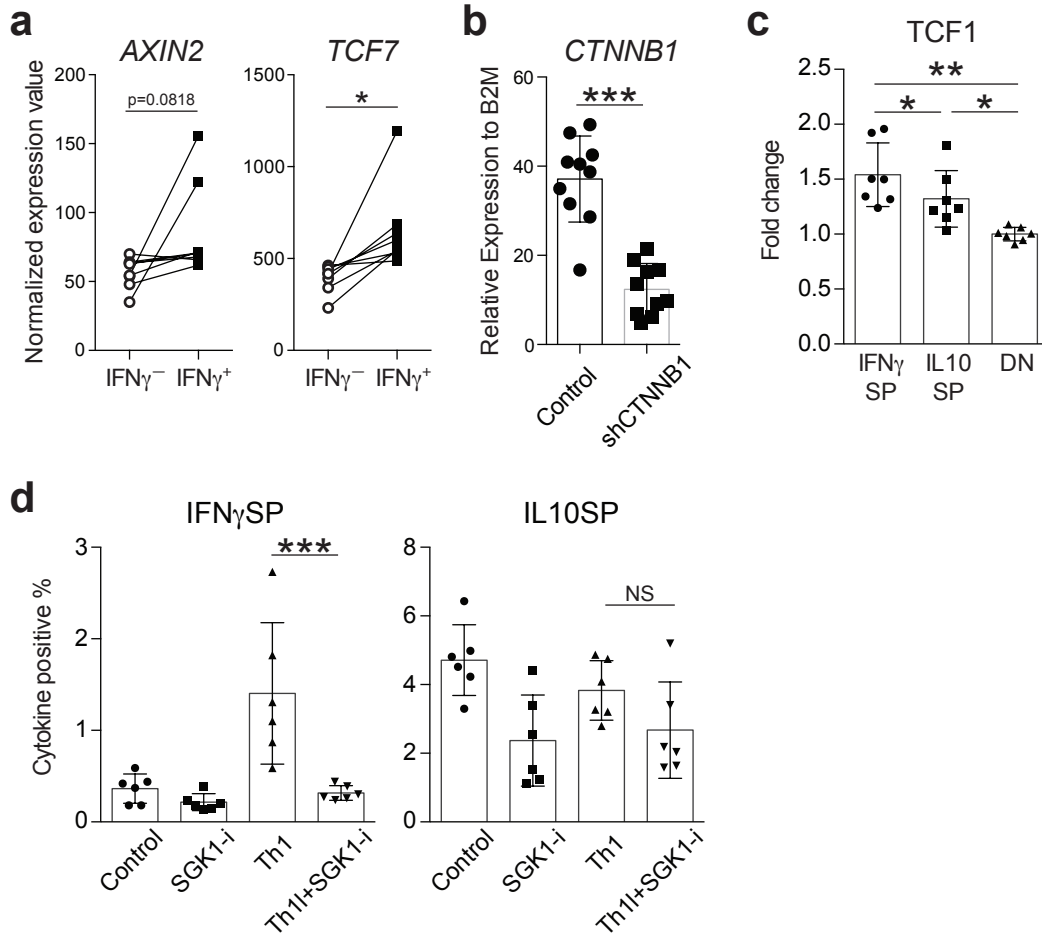

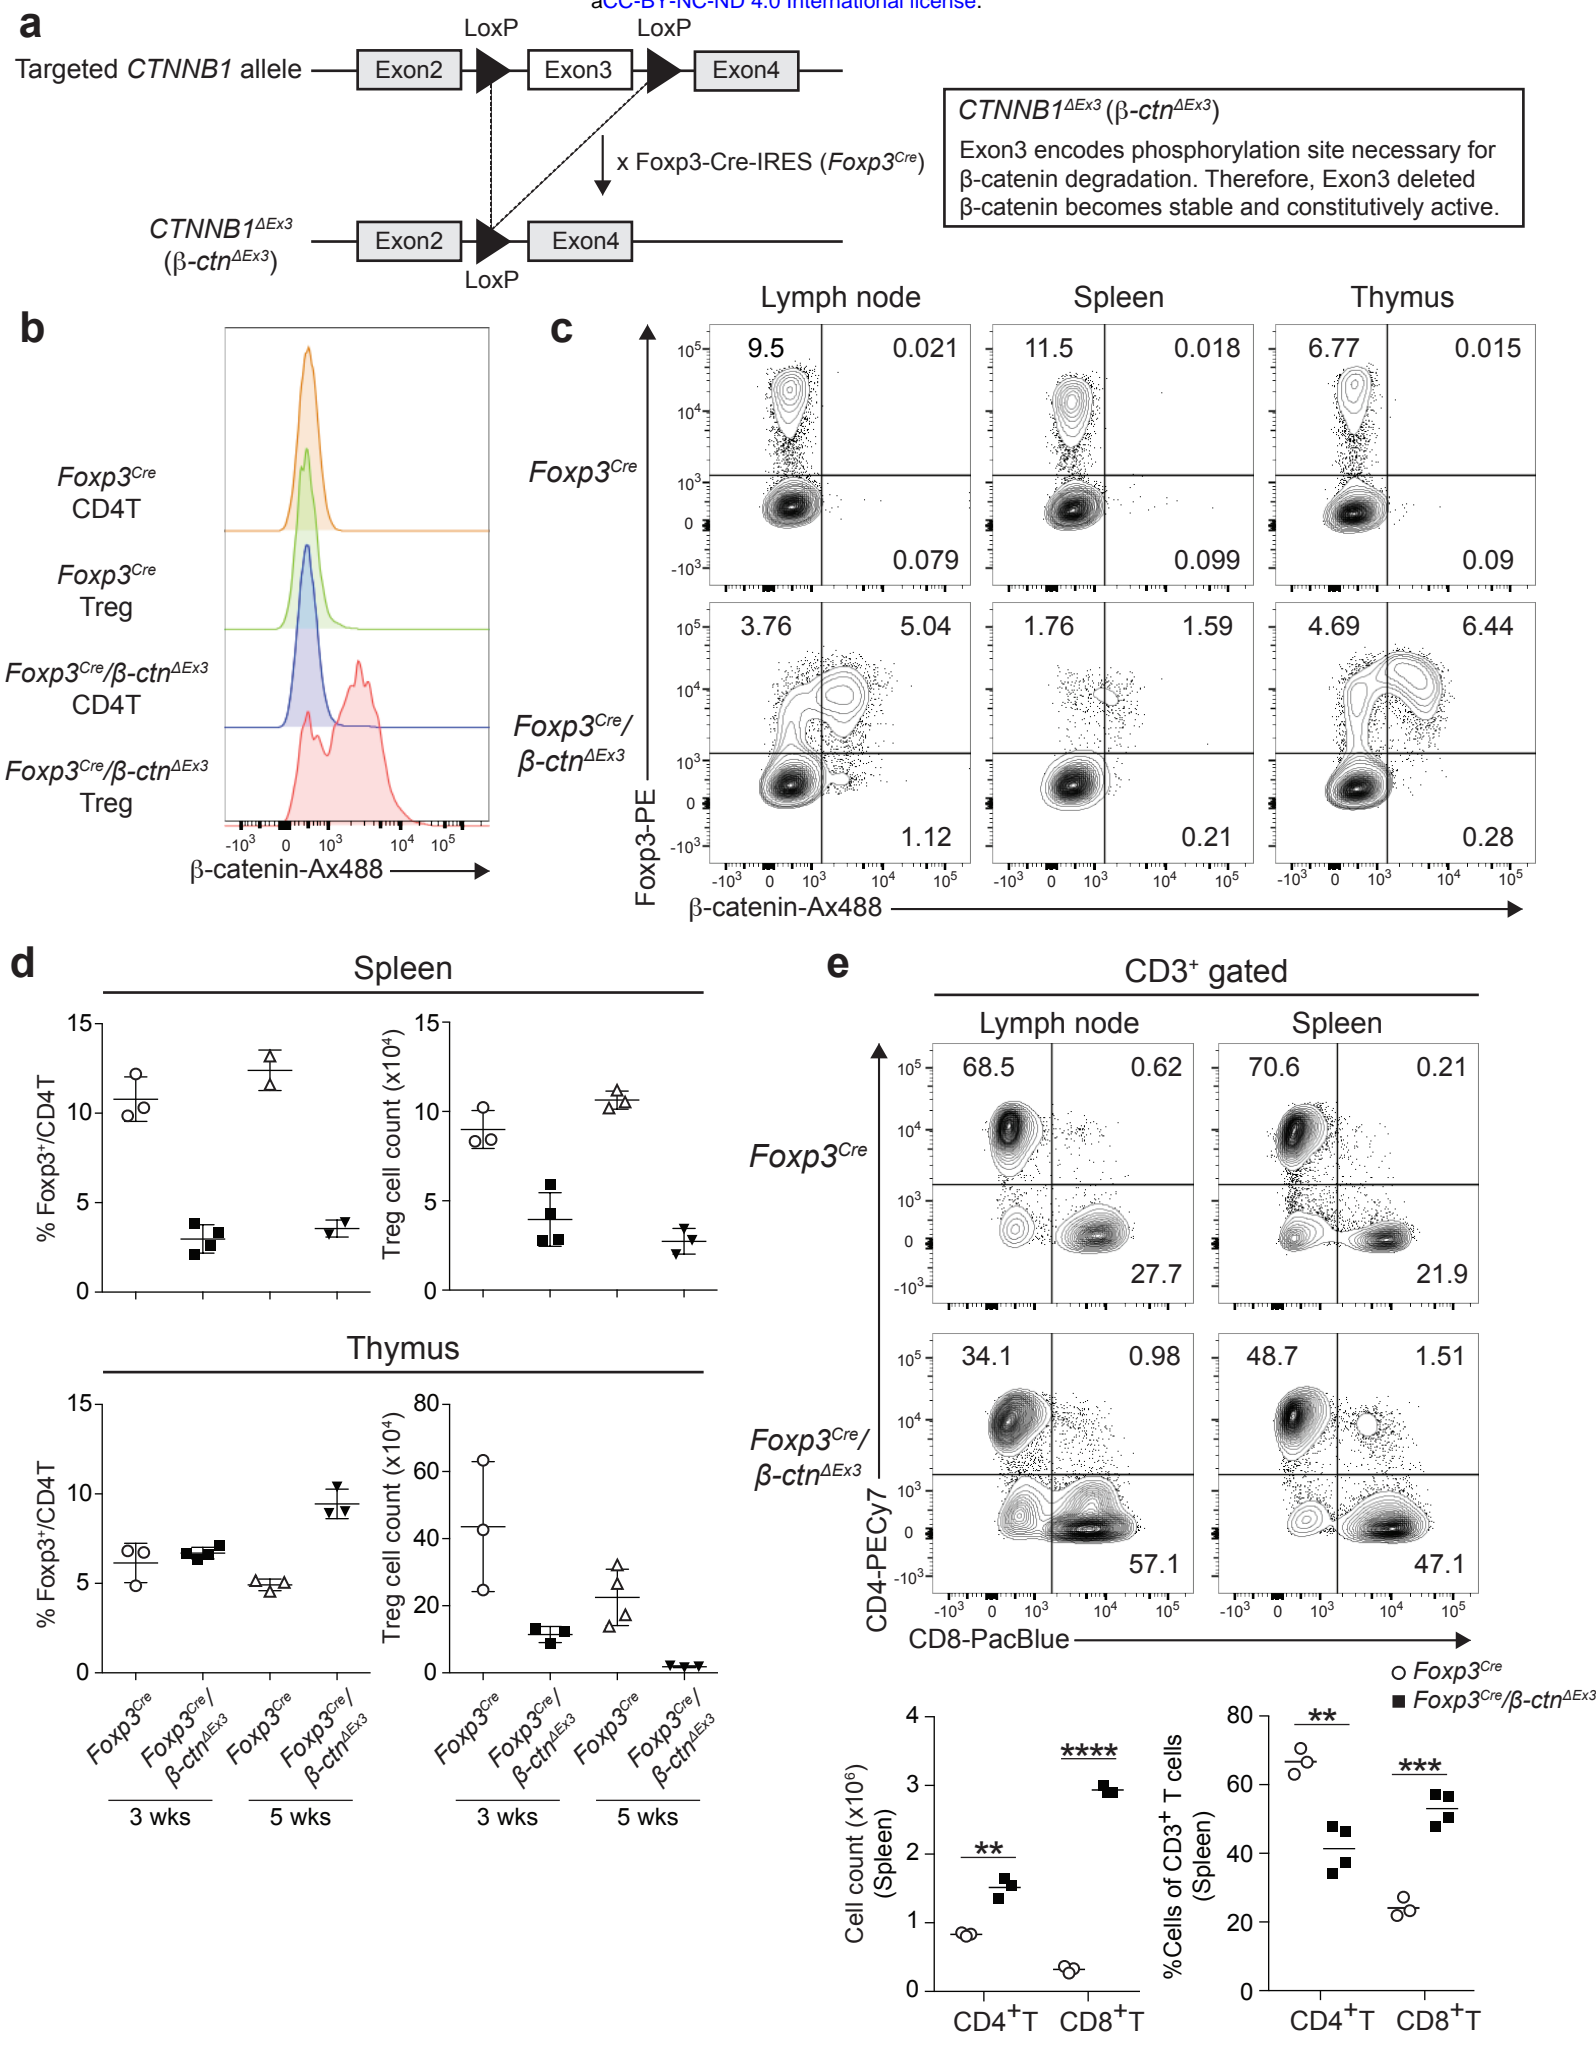

f

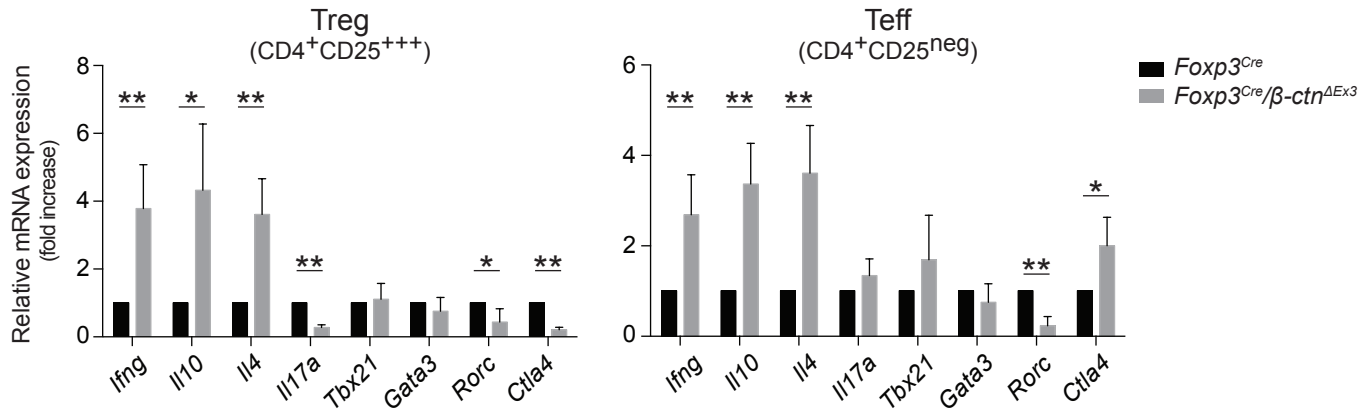

g

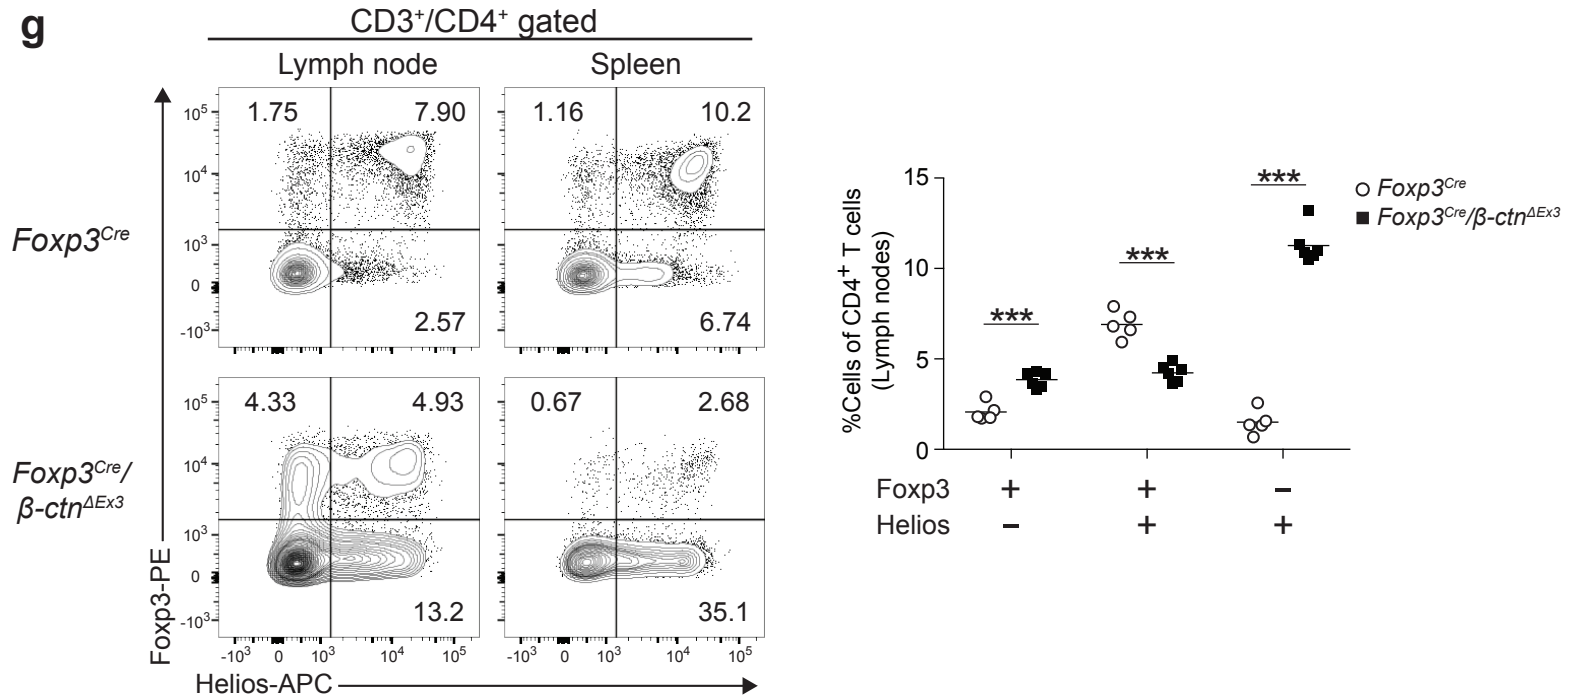

h

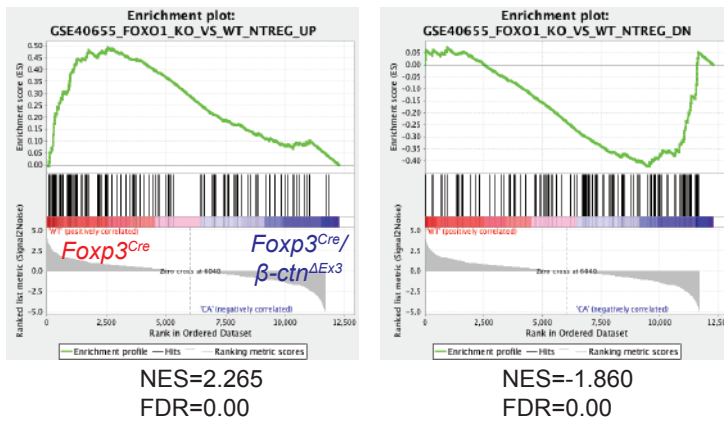

# Supplementary Fig 5

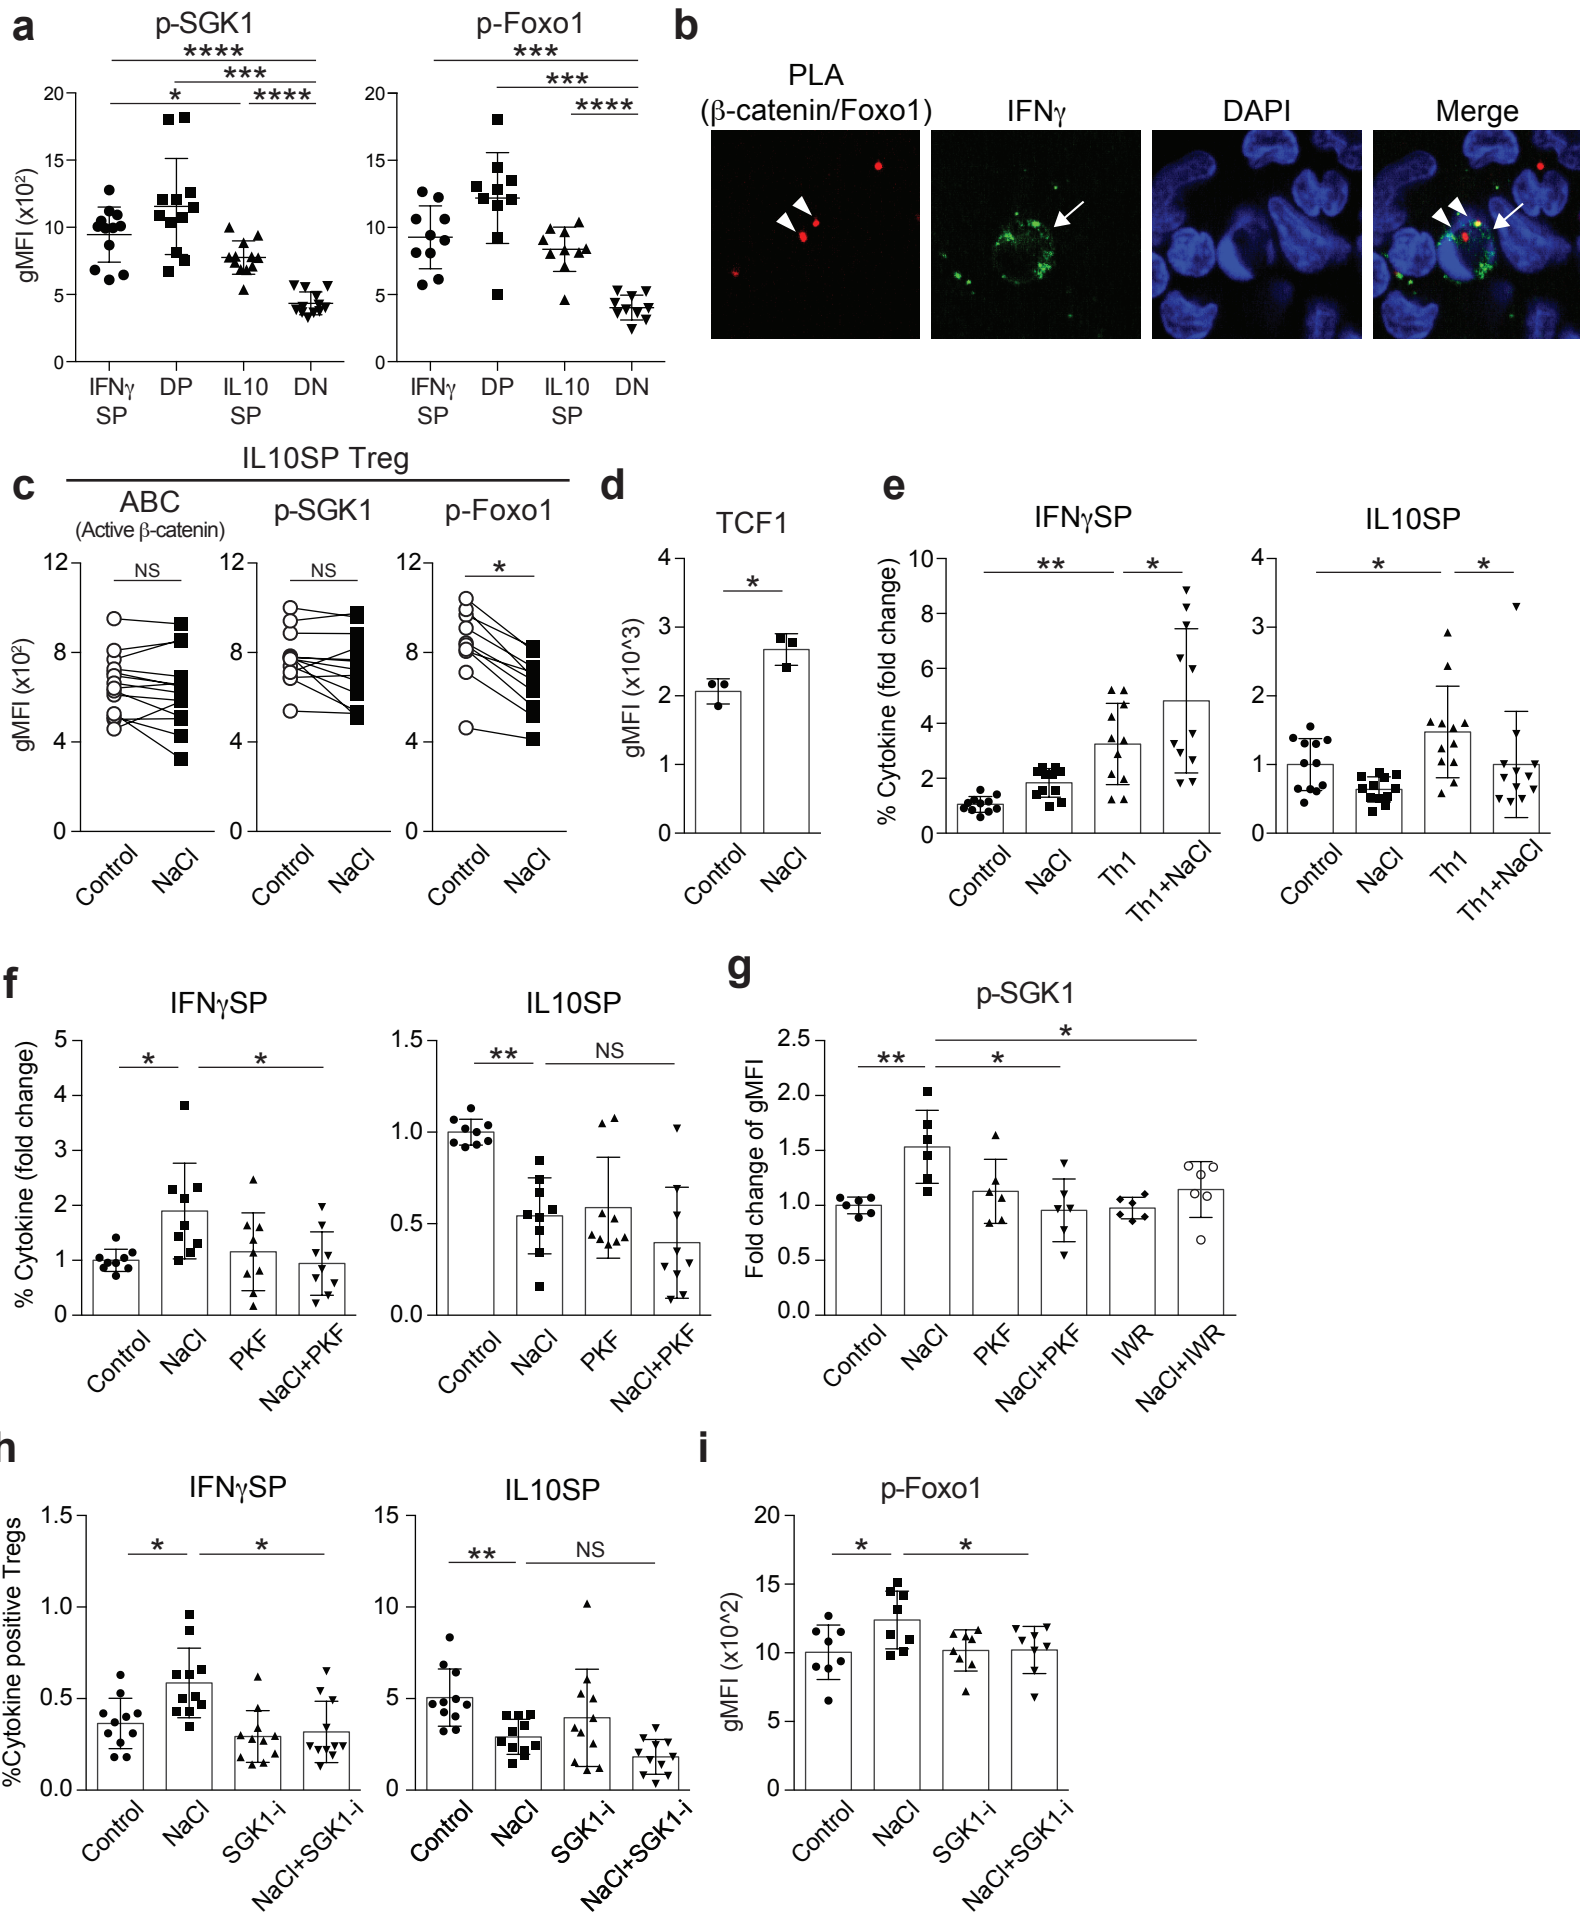

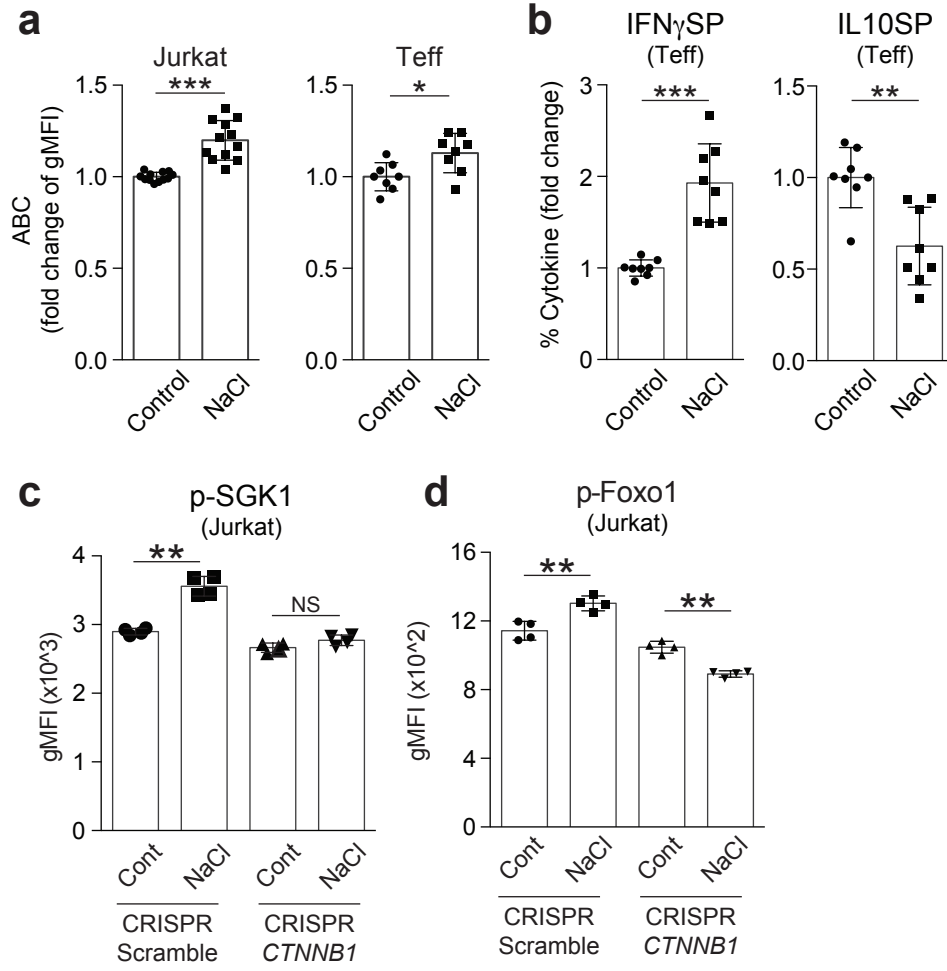

# Supplementary Fig. 7

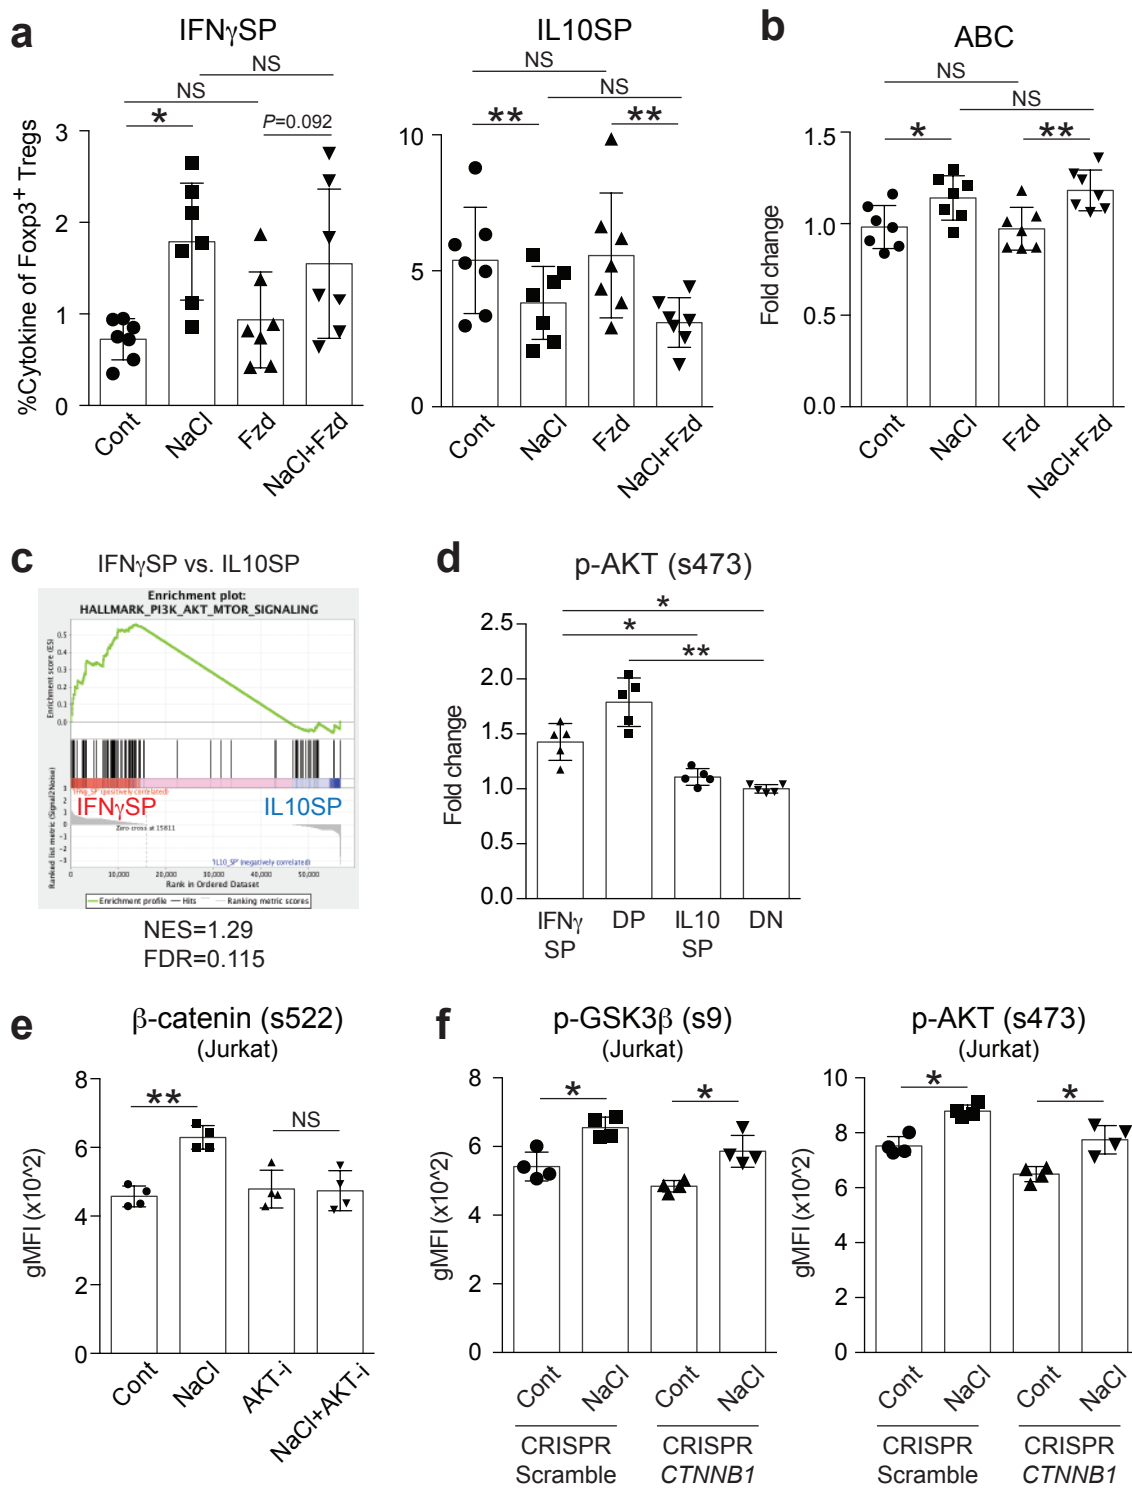

# Supplementary Fig. 8

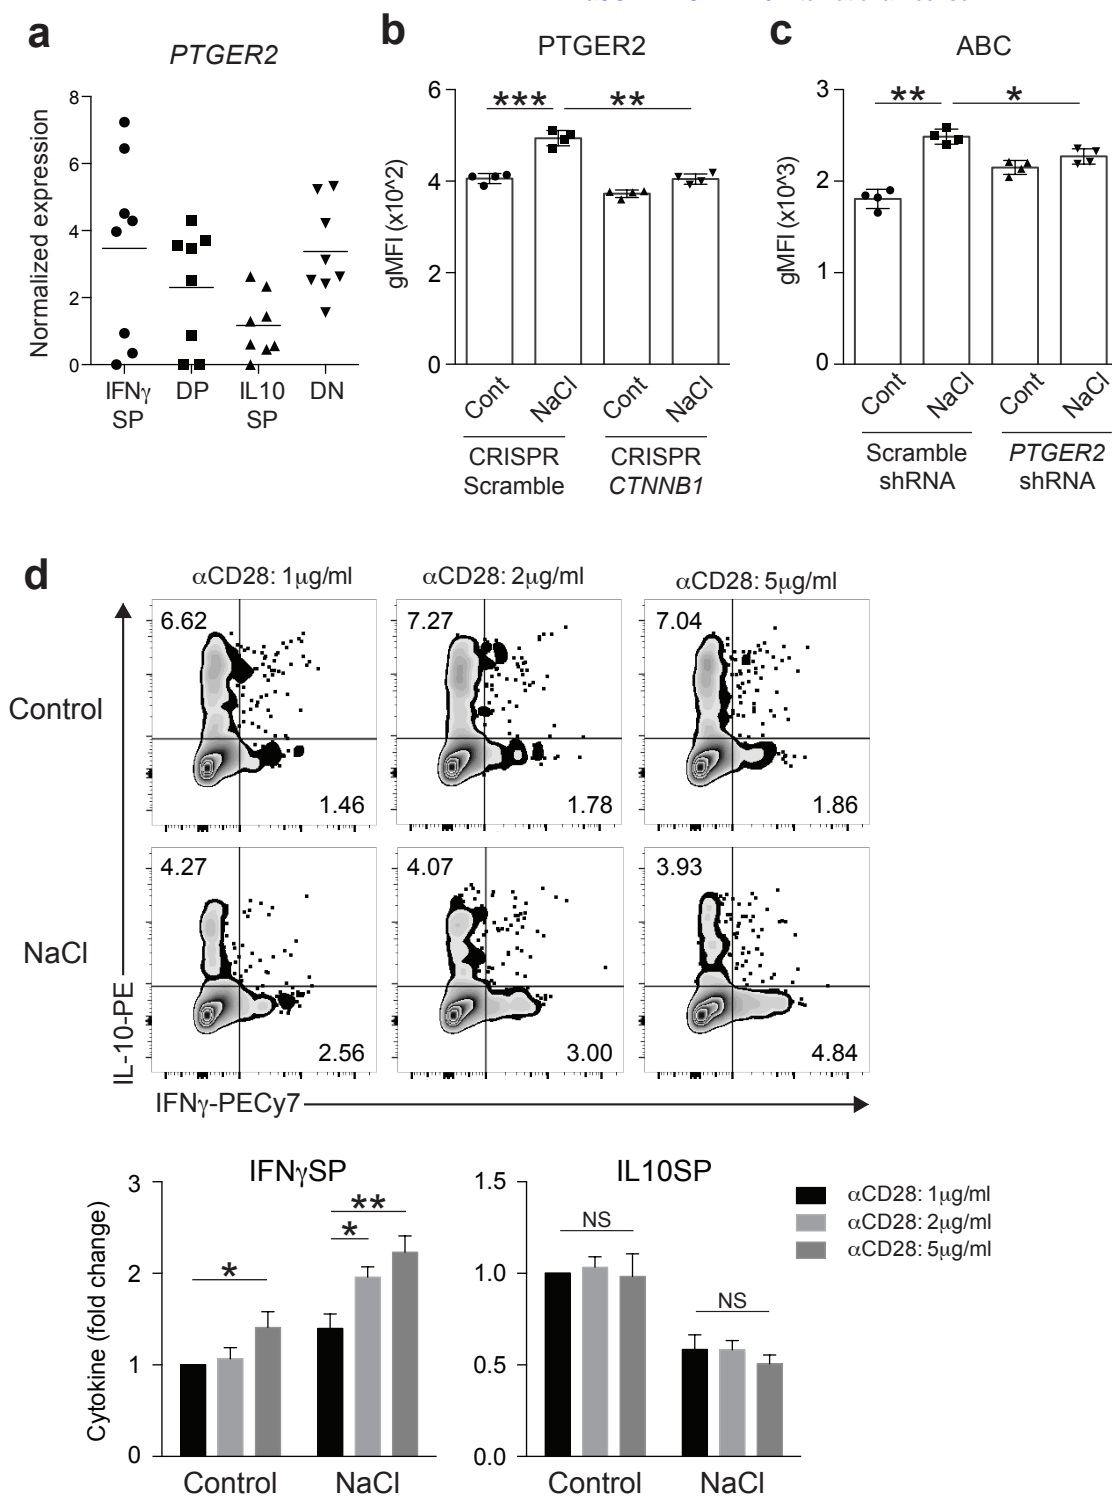



# Supplementary Fig 9

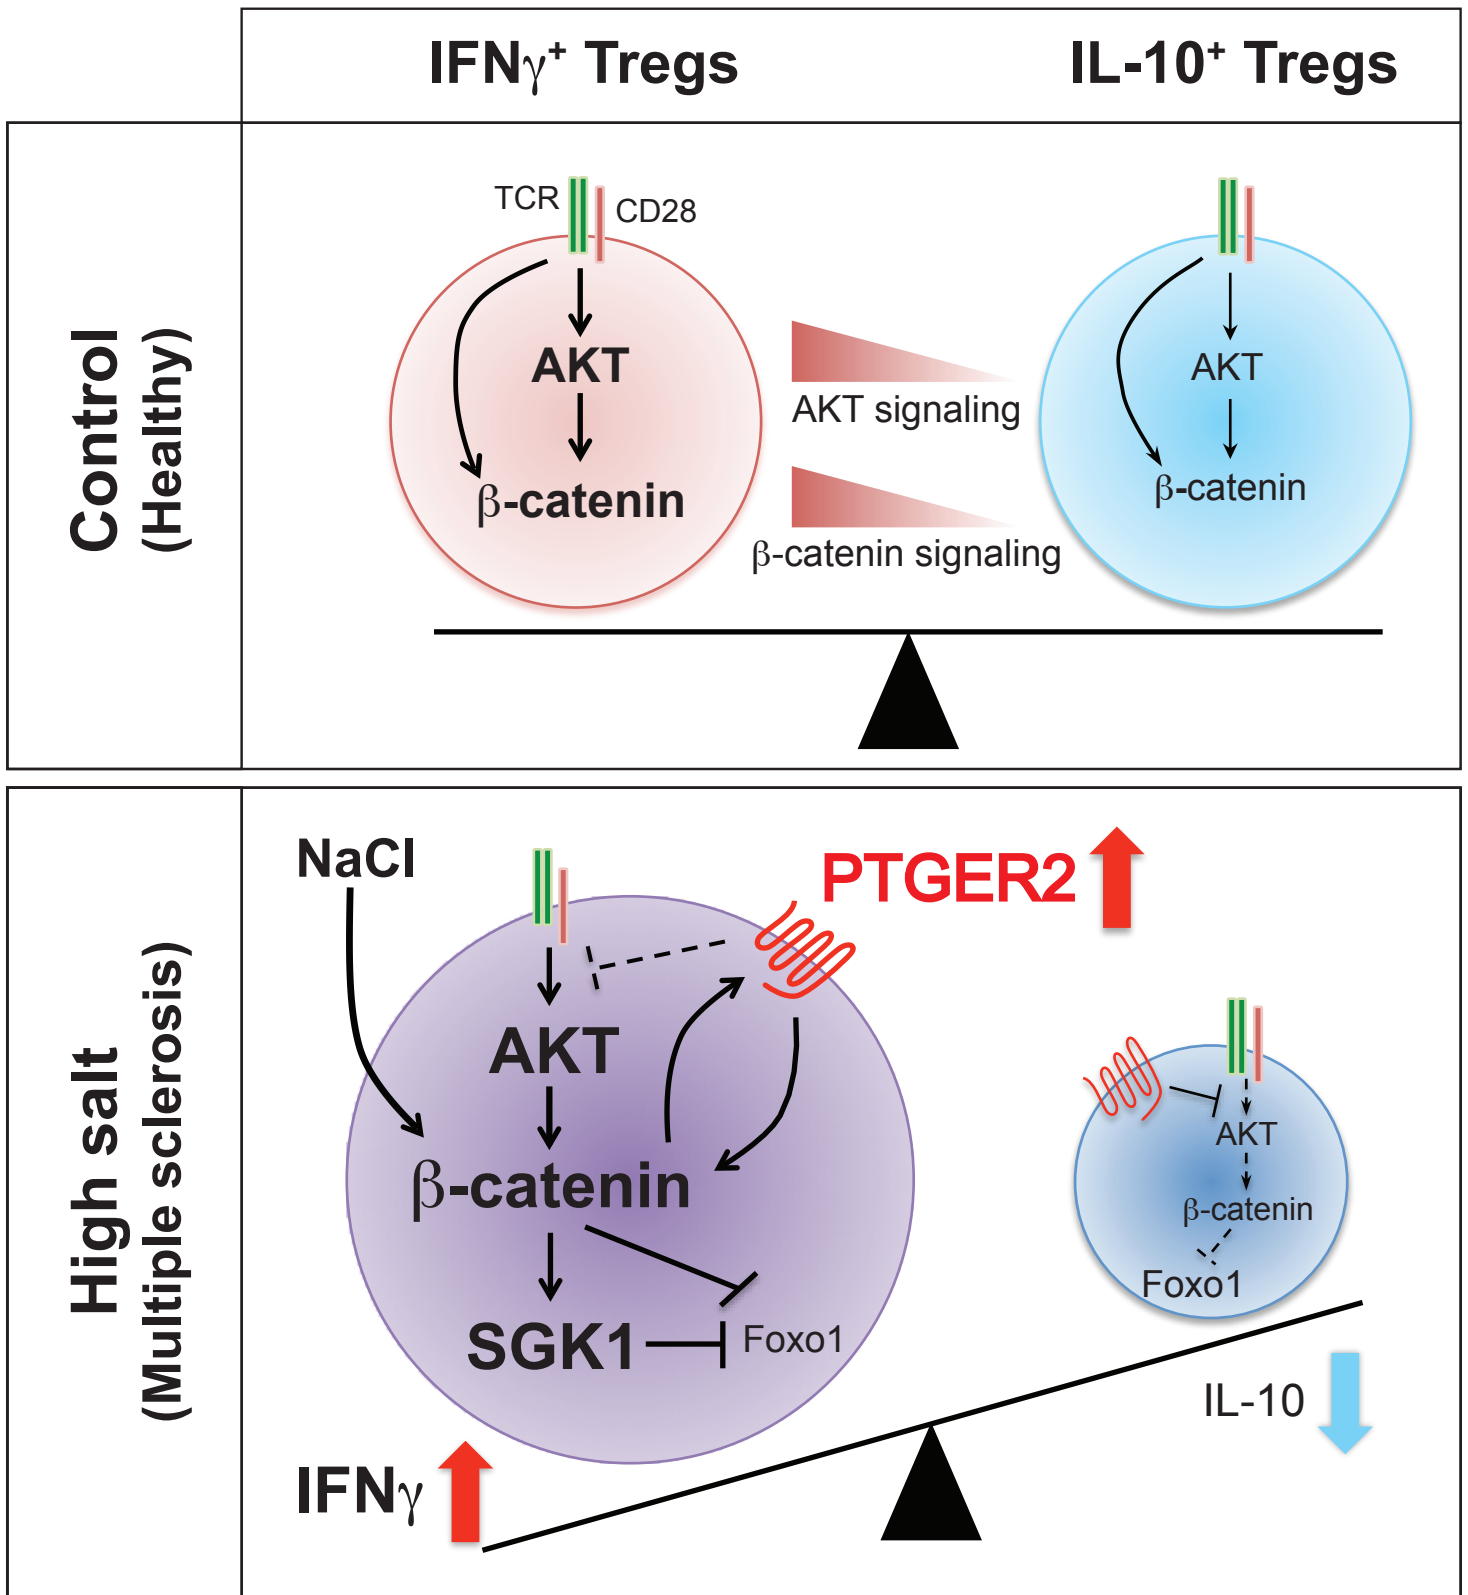

# Supplementary Table 1

| Patients | Age (at time of collection) | Sex | Ethnicity              | Duration of Disease | Treatment | EDSS         | IFNG mRNA expression | IL10 mRNA expression | Ratio of IFNG/IL10 mRNA expression |
|----------|-----------------------------|-----|------------------------|---------------------|-----------|--------------|----------------------|----------------------|------------------------------------|
| #1       | 57                          | M   | African american       | 16 yrs              | untreated | 4.5          | 0.34                 | 1.98                 | 0.172                              |
| #2       | 46                          | F   | Caucasian/Non-Hispanic | 7 yrs               | untreated | 2.5          | 1.54                 | 4.83                 | 0.319                              |
| #3       | 36                          | F   | Caucasian/Hispanic     | 1 mo                | untreated | 3.5          | 0.55                 | 21.44                | 0.026                              |
| #4       | 29                          | F   | Caucasian/Non-Hispanic | 3 yrs               | untreated | 2            | 1.31                 | 6.29                 | 0.208                              |
| #5       | 48                          | F   | Caucasian/Non-Hispanic | 18 yrs              | untreated | 6.5          | 0.72                 | 3.07                 | 0.235                              |
| #6       | 41                          | M   | Caucasian/Non-Hispanic | 10 yrs              | untreated | 1.5          | 2.32                 | 9.37                 | 0.248                              |
| #7       | 31                          | M   | Caucasian/Non-Hispanic | 2 mo                | untreated | 6            | 0.37                 | 3.78                 | 0.098                              |
| #8       | 41                          | F   | Caucasian/Non-Hispanic | 3 mo                | untreated | 3            | 0.09                 | 24.75                | 0.004                              |
| #9       | 42                          | M   | Caucasian/Non-Hispanic | <1 mo               | untreated | 1.5          | 0.4                  | 11.63                | 0.034                              |
| #10      | 34                          | F   | Caucasian/Non-Hispanic | 4 mo                | untreated | 4            | 0.57                 | 2.97                 | 0.192                              |
| #11      | 38                          | M   | Caucasian/Non-Hispanic | <1 mo               | untreated | 0            | 0.35                 | 4.23                 | 0.083                              |
| #12      | 43                          | F   | African american       | 1 yr                | untreated | 1            | 0.24                 | 3                    | 0.080                              |
| #13      | 53                          | F   | Caucasian/Non-Hispanic | 28 yrs              | untreated | 4.5          | 1.27                 | 1.34                 | 0.948                              |
| #14      | 32                          | F   | Caucasian/Non-Hispanic | 1 mo                | untreated | 1.5          | 0.99                 | 18.9                 | 0.052                              |
| #15      | 32                          | F   | Caucasian/Non-Hispanic | 3 yrs               | untreated | not assessed | 0.34                 | 3.15                 | 0.108                              |
| #16      | 28                          | F   | Caucasian/Non-Hispanic | 2 yrs               | untreated | 1            | 0.43                 | 7.69                 | 0.056                              |
| #17      | 50                          | F   | Caucasian/Non-Hispanic | <1 mo               | untreated | 3.5          | 1.81                 | 12.58                | 0.144                              |
| #18      | 43                          | F   | Caucasian/Non-Hispanic | 5 mo                | untreated | 2.5          | 2.1                  | 3.64                 | 0.577                              |
| #19      | 23                          | F   | Caucasian/Non-Hispanic | <1 mo               | untreated | 1            | 1.08                 | 4.3                  | 0.251                              |
| #20      | 58                          | F   | Caucasian/Non-Hispanic | 13 yrs              | untreated | 6            | 2.58                 | 2.23                 | 1.157                              |
| #21      | 34                          | F   | Caucasian/Non-Hispanic | 1 mo                | untreated | 1.5          | 2.1                  | 9.81                 | 0.214                              |
| #22      | 30                          | F   | Caucasian/Non-Hispanic | 12 yrs              | untreated | 2            | 2.47                 | 30.16                | 0.082                              |
| #23      | 27                          | F   | Caucasian/Non-Hispanic | <1 mo               | untreated | 0            | 1.78                 | 13.38                | 0.133                              |
| #24      | 61                          | F   | Caucasian/Non-Hispanic | 20 yrs              | untreated | 4            | 1.05                 | 12.99                | 0.081                              |
| #25      | 35                          | F   | Caucasian/Hispanic     | 1 yr                | untreated | 2            | 0.89                 | 21.71                | 0.041                              |
| #26      | 33                          | F   | Caucasian/Non-Hispanic | 1 mo                | untreated | 1.5          | 0.5                  | 18.97                | 0.026                              |
| #27      | 44                          | F   | Caucasian/Non-Hispanic | 8 yrs               | untreated | 2.5          | 0.46                 | 14.56                | 0.032                              |

## Supplementary Table 2

| <i>Antibodies/Kits</i>                         | <i>Source</i> | <i>Experiments for use</i> |
|------------------------------------------------|---------------|----------------------------|
| <b>Human</b>                                   |               |                            |
| anti-CD4 (RPA-T4)                              | BD Bioscience | Flow cytometry             |
| anti-CD25 (MA251)                              | BD Bioscience | Flow cytometry             |
| anti-CD127 (HIL-7R-M21)                        | BD Bioscience | Flow cytometry             |
| anti-CD45RO (UCHL1)                            | BD Bioscience | Flow cytometry             |
| anti-IL-10 (JES3-9D7)                          | BioLegend     | Flow cytometry             |
| anti-IFN $\gamma$ (B27)                        | BD Bioscience | Flow cytometry             |
| anti-IFN $\gamma$ (4S.B3)                      | eBioscience   | Flow cytometry             |
| anti- $\beta$ -catenin (14/Beta-Catenin)       | BD Bioscience | Flow cytometry, PLA        |
| anti-active $\beta$ -catenin (8E7)             | Millipore     | Flow cytometry             |
| anti-phospho $\beta$ -catenin (Ser522) (D8E11) | CST           | Flow cytometry             |
| anti-phospho AKT (Ser473) (D9E)                | CST           | Flow cytometry             |
| anti-phospho GSK3 $\beta$ (Ser9) (D85E12)      | CST           | Flow cytometry             |
| anti-Foxp3 (PCH101)                            | eBioscience   | Flow cytometry             |
| anti-phospho Foxo1 (S256) polyclonal           | Bioss         | Flow cytometry             |
| anti-phospho SGK1 (T256) polyclonal            | Bioss         | Flow cytometry             |
| IFN $\gamma$ secretion assay (APC)             | Miltenyi      | Flow cytometry             |
| IL-10 secretion assay (PE)                     | Miltenyi      | Flow cytometry             |
| anti-Foxo1 (C29H4)                             | CST           | PLA                        |
| anti-TCF1 (S33-966)                            | BD Bioscience | Flow cytometry             |
| anti-Tbet (4B10)                               | BioLegend     | Flow cytometry             |
| anti-PTGER2 (EPR8030(B))                       | Abcam         | Flow cytometry             |
|                                                |               |                            |
| anti-CD3 (UCHT1)                               | BD Bioscience | Cell culture               |
| anti-CD28 (28.2)                               | BD Bioscience | Cell culture               |

|                                              |             |                |
|----------------------------------------------|-------------|----------------|
| <b>Mouse</b>                                 |             |                |
| anti-Foxp3 (FJK-16s)                         | eBioscience | Flow cytometry |
| anti-CD3 (145-2C11)                          | eBioscience | Flow cytometry |
| anti-CD4 (RM4-5)                             | eBioscience | Flow cytometry |
| anti-CD8 (53-6.7)                            | eBioscience | Flow cytometry |
| anti-Helios (22F6)                           | BioLegend   | Flow cytometry |
| anti-phospho Foxo1 (S256) (E1F7T)            | CST         | Flow cytometry |
| anti-phospho Foxo3a (Ser253) (D18H8)         | CST         | Flow cytometry |
| anti-phospho Foxo1(T24)/3a(T32)/4(T28) (4G6) | CST         | Flow cytometry |
| anti-SGK1 (Y238)                             | Abcam       | Flow cytometry |
| anti-GATA3 (TWAJ)                            | eBioscience | Flow cytometry |
| anti-ROR $\gamma$ t (B2D)                    | eBioscience | Flow cytometry |

|                                      |            |              |
|--------------------------------------|------------|--------------|
|                                      |            |              |
| Dynabeads Mouse T-Activator CD3/CD28 | Invitrogen | Cell culture |

|                                    |               |                |
|------------------------------------|---------------|----------------|
| <b>Human/Mouse</b>                 |               |                |
| PE-Cy™7 Streptavidin               | BD Bioscience | Flow cytometry |
| Zombie Aqua™ Fixable Viability dye | BioLegend     | Flow cytometry |
